# Supplementary material for: The influence of different cations on the structure and spectral properties of Ln3+ tetrakis-complexes with the CAPh-type ligand dimethyl-N-trichloroacetylamidophosphate
Source: Royal Society of Chemistry journal article supplement (doi:10.1039/d4nj01700e), 2024-01-01
Supplement: d4nj01700e1.pdf [file d4nj01700e1.pdf]

**The Influence of Different Cations on the Structure and Spectral Properties of  
Ln<sup>3+</sup> Tetrakis-Complexes with CPh-type Ligand Dimethyl-N-  
trichloroacetylamidophosphate**

Mariia B. Struhatska,<sup>a</sup> Nataliia S. Kariaka,<sup>a\*</sup> Viktoriya V. Dyakonenko,<sup>b</sup> Svitlana V. Shishkina,<sup>b</sup> Sergii S. Smola,<sup>c</sup> Nataliia V. Rusakova,<sup>c</sup> Paula Gawryszewska,<sup>d</sup> Oscar L. Malta,<sup>e</sup> Albano N. Carneiro Neto,<sup>f</sup> Viktor O. Trush,<sup>a</sup> Volodymyr M. Amirkhanov<sup>a,\*</sup>

<sup>a</sup> Inorganic Chemistry Department, Taras Shevchenko National University of Kyiv, 12, Lva Tolstogo str., Kyiv 01601, Ukraine

<sup>b</sup> SSI “Institute for Single Crystals”, National Academy of Sciences of Ukraine Nauky ave. 60, 61001 Kharkiv, Ukraine

<sup>c</sup> A.V. Bogatsky Physicochemical Institute, NAS of Ukraine, 86, Lustdorfska doroga str., Odessa 65080, Ukraine

<sup>d</sup> Faculty of Chemistry, University of Wrocław, 14 F. Joliot-Curie Str., 50-383, Wrocław, Poland

<sup>e</sup> Departamento de Química Fundamental, Universidade Federal de Pernambuco, 50740-560, Recife, Brazil

<sup>f</sup> Physics Department and CICECO – Aveiro Institute of Materials, University of Aveiro, 3810-193, Aveiro, Portugal

## Contents

|                                                      |    |
|------------------------------------------------------|----|
| 1. Theoretical Judd-Ofelt intensity parameters ..... | 3  |
| 2. Tables .....                                      | 4  |
| Table S1 .....                                       | 4  |
| Table S2 .....                                       | 4  |
| Table S4 .....                                       | 6  |
| Table S5 .....                                       | 6  |
| Table S6 .....                                       | 6  |
| Table S7 .....                                       | 8  |
| Table S8 .....                                       | 9  |
| Table S9 .....                                       | 10 |
| Table S10 .....                                      | 11 |
| Table S11 .....                                      | 12 |

|                 |    |
|-----------------|----|
| Table S12.....  | 13 |
| Table S13.....  | 14 |
| Table S14.....  | 16 |
| Table S15.....  | 18 |
| Table S16.....  | 20 |
| Table S17.....  | 22 |
| Table S18.....  | 24 |
| 3. Figures..... | 26 |
| Figure S1.....  | 26 |
| Figure S2.....  | 27 |
| Figure S3.....  | 28 |
| Figure S4.....  | 29 |
| Figure S5.....  | 30 |
| Figure S6.....  | 31 |
| Figure S7.....  | 32 |
| Figure S8.....  | 33 |
| Figure S9.....  | 34 |
| References..... | 35 |

## 1. Theoretical Judd-Ofelt intensity parameters

From the theoretical point of view, the intensity parameters are mainly formed by the forced electric dipole (FED) and dynamic coupling (DC) mechanisms for the 4f-4f intensities when the lanthanide does not occupy a centrosymmetric site [1–4]. The expressions used here for the calculations of the intensity parameters ( $\Omega_{\lambda}^{theo}$ ,  $\lambda = 2, 4, 6$ ) have been described in several references [5–7]. For this reason, a short explanation is given here:

$$\Omega_{\lambda}^{theo} = (2\lambda + 1) \sum_{t,p} \frac{|B_{\lambda tp}|^2}{2t + 1}, \quad B_{\lambda tp} = B_{\lambda tp}^{FED} + B_{\lambda tp}^{DC} \quad S1)$$

where,

$$B_{\lambda tp}^{FED} = \frac{2}{\Delta E} \langle r^{t+1} \rangle \Theta(t, \lambda) \left( \frac{4\pi}{2t+1} \right)^{\frac{1}{2}} \sum_j \frac{e^2 \rho_j g_j (2\beta_j)^{t+1}}{R_j^{t+1}} (Y_p^{t*})_j \quad S2)$$

$$B_{\lambda tp}^{DC} = - \left[ \frac{(\lambda + 1)(2\lambda + 3)}{(2\lambda + 1)} \right]^{\frac{1}{2}} \langle r^{\lambda} \rangle \langle f \| C^{(\lambda)} \| f \rangle \times \left( \frac{4\pi}{2t+1} \right)^{\frac{1}{2}} \sum_j \frac{[(2\beta_j)^{t+1} \alpha_{OPj} + \alpha'_j]}{R_j^{t+1}} (Y_p^{t*})_j \delta_{t, \lambda} \quad S3)$$

with  $t$  and  $p$  being the ranks and components of the spherical harmonics ( $Y_p^{t*}$ ),  $\langle f \| C^{(2)} \| f \rangle = -1.366$ ,  $\langle f \| C^{(4)} \| f \rangle = 1.128$ ,  $\langle f \| C^{(6)} \| f \rangle = -1.27$ ,  $\rho$  is the overlap integral between the valence subshells of the ligating atom and the 4f subshell of the lanthanide ion,  $\beta = 1/(1 \pm \rho)$  is a parameter that defines the centroid of the electronic density of the chemical bond Ln–X (X= ligating atom),  $\alpha'$  is the effective polarizability from each ligand around the Ln<sup>3+</sup> and  $g$  is the charge factor. Both  $\alpha'$  and  $g$  were estimated from fitting procedures in the JOYSpectra program [8]. Eq. S2 stands for the Simple Overlap Model (SOM) [6] for the odd component of the ligand field while Eq. S3 is the Bond Overlap Model (BOM) for the polarizability-dependent term (Dynamic Coupling mechanism) of 4f-4f transitions [7].  $\alpha_{OP}$  are quantities related to the covalent fraction of a chemical bond [7,9–11]. See refs. [7,12,13] for more details on these expressions.

Table S5 summarizes the theoretical intensity parameters and the contribution of the FED mechanism while the values of  $\alpha'$  and  $g$  obtained from the fitting procedure in the JOYSpectra [8] are shown in Table S7.

## 2. Tables

**Table S1.** Crystallographic data and experimental parameters for the NMe<sub>4</sub>[EuL<sub>4</sub>], NEt<sub>4</sub>[EuL<sub>4</sub>], PPh<sub>4</sub>[GdL<sub>4</sub>] structures.

| Compound                                       | NMe <sub>4</sub> [EuL <sub>4</sub> ]                                                             | NEt <sub>4</sub> [EuL <sub>4</sub> ]                                                             | PPh <sub>4</sub> [GdL <sub>4</sub> ]                                                             |
|------------------------------------------------|--------------------------------------------------------------------------------------------------|--------------------------------------------------------------------------------------------------|--------------------------------------------------------------------------------------------------|
| Formula                                        | C <sub>20</sub> H <sub>36</sub> Cl <sub>12</sub> EuN <sub>5</sub> O <sub>16</sub> P <sub>4</sub> | C <sub>24</sub> H <sub>44</sub> Cl <sub>12</sub> EuN <sub>5</sub> O <sub>16</sub> P <sub>4</sub> | C <sub>40</sub> H <sub>44</sub> Cl <sub>12</sub> GdN <sub>4</sub> O <sub>16</sub> P <sub>5</sub> |
| <i>D</i> <sub>calc.</sub> / g cm <sup>-3</sup> | 1.675                                                                                            | 1.684                                                                                            | 1.697                                                                                            |
| <i>m</i> /mm <sup>-1</sup>                     | 2.015                                                                                            | 1.947                                                                                            | 1.789                                                                                            |
| Formula Weight                                 | 1303.78                                                                                          | 1359.88                                                                                          | 1574.29                                                                                          |
| <i>T</i> /K                                    | 294                                                                                              | 294                                                                                              | 173.15                                                                                           |
| Crystal System                                 |                                                                                                  | monoclinic                                                                                       |                                                                                                  |
| Space Group                                    | <i>P</i> 2/ <i>n</i>                                                                             |                                                                                                  | <i>P</i> 2 <sub>1</sub> / <i>c</i>                                                               |
| <i>a</i> /Å                                    | 12.0428(8)                                                                                       | 20.4825(6)                                                                                       | 19.8828(8)                                                                                       |
| <i>b</i> /Å                                    | 10.2128(6)                                                                                       | 12.2546(3)                                                                                       | 19.1092(8)                                                                                       |
| <i>c</i> /Å                                    | 21.0833(11)                                                                                      | 21.3808(6)                                                                                       | 17.3678(6)                                                                                       |
| <i>a</i> <sup>o</sup>                          | 90                                                                                               | 90                                                                                               | 90                                                                                               |
| <i>b</i> <sup>o</sup>                          | 94.501(5)                                                                                        | 92.286(2)                                                                                        | 110.925(3)                                                                                       |
| <i>g</i> <sup>o</sup>                          | 90                                                                                               | 90                                                                                               | 90                                                                                               |
| V/Å <sup>3</sup>                               | 2585.1(3)                                                                                        | 5362.4(2)                                                                                        | 6163.6(4)                                                                                        |
| Z                                              | 2                                                                                                | 4                                                                                                | 4                                                                                                |
| Measured Refl's.                               | 5084                                                                                             | 38874                                                                                            | 97953                                                                                            |
| Indep't Refl's                                 | 5084                                                                                             | 10526                                                                                            | 10860                                                                                            |
| Refl's I ≥ 2 <i>s</i> (I)                      | 4166                                                                                             | 7499                                                                                             | 8571                                                                                             |
| <i>R</i> <sub>int</sub>                        | .                                                                                                | 0.1013                                                                                           | 0.1215                                                                                           |
| Parameters                                     | 297                                                                                              | 624                                                                                              | 711                                                                                              |
| Goof                                           | 1.071                                                                                            | 1.053                                                                                            | 1.102                                                                                            |
| <i>wR</i> <sub>2</sub> (all data)              | 0.1861                                                                                           | 0.2276                                                                                           | 0.1438                                                                                           |
| <i>wR</i> <sub>2</sub>                         | 0.1747                                                                                           | 0.2035                                                                                           | 0.1261                                                                                           |
| <i>R</i> <sub>1</sub> (all data)               | 0.0878                                                                                           | 0.1061                                                                                           | 0.1101                                                                                           |
| <i>R</i> <sub>1</sub>                          | 0.0725                                                                                           | 0.0785                                                                                           | 0.0612                                                                                           |
| CCDC                                           | 2290967                                                                                          | 2290968                                                                                          | 2290969                                                                                          |

**Table S2.** Selected bond lengths (Å) in [EuL<sub>4</sub>]<sup>-</sup> and [GdL<sub>4</sub>]<sup>-</sup> anions.

|     |    | NMe <sub>4</sub> [EuL <sub>4</sub> ] | NEt <sub>4</sub> [EuL <sub>4</sub> ] | PPh <sub>4</sub> [GdL <sub>4</sub> ] |
|-----|----|--------------------------------------|--------------------------------------|--------------------------------------|
| Ln1 | O2 | 2.343(5)                             | 2.343(5)                             | 2.322(5)                             |
| Ln1 | O3 | 2.452(5)                             | 2.492(7)                             | 2.454(5)                             |
| Ln1 | O4 | 2.322(5)                             | 2.333(5)                             | 2.337(5)                             |
| Ln1 | O5 | 2.500(5)                             | 2.459(5)                             | 2.424(5)                             |
| Ln1 | O6 | 2.321(5)                             | 2.351(6)                             | 2.362(5)                             |
| Ln1 | O7 | 2.500(5)                             | 2.482(6)                             | 2.415(5)                             |
| Ln1 | O8 | 2.343(5)                             | 2.338(5)                             | 2.338(5)                             |
| Ln1 | O9 | 2.453(5)                             | 2.433(6)                             | 2.474(5)                             |

The root mean square deviation (RMSD) from the best point group symmetry for the coordination polyhedron of these complexes using the equation:

$$RMSD = \sqrt{\frac{1}{N} \sum_i^N [(x_i - x_i^s)^2 + (y_i - y_i^s)^2 + (z_i - z_i^s)^2]} \quad (S4)$$

where  $N$  is the total number of atoms in the coordination polyhedron (8 for all cases), while  $(x_i, y_i, z_i)$  and  $(x_i^s, y_i^s, z_i^s)$  are the Cartesian coordinates of the actual position of atom  $i$  and its ideal position (exact position within a point group symmetry), respectively.

Table S3 illustrates the deviation to the closest group symmetry for all compounds, as well as the comparison of the coordination polyhedron and the  $[\text{EuL}_4]^-$  unit with each other.

These RMSD values indicate the degree of deviation of the actual coordination polyhedron structures from their idealized symmetries ( $D_{2d}$ ,  $D_2$ , and  $S_4$ ), reflecting how closely the compounds are to their respective point group symmetries. Additionally, these point groups share the  $C_2$  axis symmetry operation. The RMSD for a perfect  $C_2$  operation along the z-axis (Figure S8) shows that larger cations result in higher distortion, which is consistent with the observed hypersensitivity ratios.

**Table S3.** The closest point group symmetry of the coordination polyhedron associated with the number of emission peaks and its deviation (RMSD in Å) from a pure point group symmetry. The RMSD values between structures of the coordination polyhedron and entire  $[\text{EuL}_4]^-$  unit (in parentheses) are also presented.

| Compound                             | Closest point group symmetry         | RMSD (Å)          |
|--------------------------------------|--------------------------------------|-------------------|
| NMe <sub>4</sub> [EuL <sub>4</sub> ] | D <sub>2d</sub>                      | 0.05530           |
| NEt <sub>4</sub> [EuL <sub>4</sub> ] | D <sub>2</sub>                       | 0.05607           |
| PPh <sub>4</sub> [EuL <sub>4</sub> ] | S <sub>4</sub>                       | 0.06189           |
| Compound 1                           | Compound 2                           | RMSD (Å)          |
| NMe <sub>4</sub> [EuL <sub>4</sub> ] | NEt <sub>4</sub> [EuL <sub>4</sub> ] | 0.05075 (0.75405) |
| NMe <sub>4</sub> [EuL <sub>4</sub> ] | PPh <sub>4</sub> [EuL <sub>4</sub> ] | 0.10009 (2.08243) |
| NEt <sub>4</sub> [EuL <sub>4</sub> ] | PPh <sub>4</sub> [EuL <sub>4</sub> ] | 0.11276 (2.07116) |

**Table S4.** Emission decay times (in ms) of Cat[LnL<sub>4</sub>] (Ln = Eu, Tb) measured at

different excitation wavelengths and the deviation of the monoexponential fitting function.

| Temperature                          | 298 K                                |           |           | 77 K      |           |           |
|--------------------------------------|--------------------------------------|-----------|-----------|-----------|-----------|-----------|
|                                      | Excitation wavelength (nm)           | 277 nm    | 300 nm    | 394 nm    | 277 nm    | 300 nm    |
| NMe <sub>4</sub> [EuL <sub>4</sub> ] |                                      | 2.62±0.01 | 2.65±0.01 | -         | 2.72±0.03 | 2.67±0.04 |
| NEt <sub>4</sub> [EuL <sub>4</sub> ] | -                                    | -         | 2.78±0.01 | -         | -         | 2.76±0.01 |
| PPh <sub>4</sub> [EuL <sub>4</sub> ] | 1.45±0.01                            | -         | 1.39±0.01 | 1.43±0.01 | -         | 1.41±0.01 |
| Excitation wavelength (nm)           | 277 nm                               | 300 nm    | 368 nm    | 277 nm    | 300 nm    | 368 nm    |
|                                      | NMe <sub>4</sub> [TbL <sub>4</sub> ] | -         | 2.34±0.01 | 2.44±0.01 | -         | 2.26±0.02 |
| NEt <sub>4</sub> [TbL <sub>4</sub> ] | -                                    | -         | 2.90±0.01 | -         | -         | 2.66±0.03 |
| PPh <sub>4</sub> [TbL <sub>4</sub> ] | -                                    | -         | 1.78±0.03 | 1.58±0.02 | -         | 1.42±0.01 |

**Table S5.** Theoretical  $\Omega_\lambda$  and the contribution of the FED mechanism (both in units of  $10^{-20} \text{ cm}^2$ ) for Q[LnL<sub>4</sub>] (Q = [NMe<sub>4</sub>]<sup>+</sup>, [NEt<sub>4</sub>]<sup>+</sup>, and [PPh<sub>4</sub>]<sup>+</sup>; Ln = Eu<sup>3+</sup> and Tb<sup>3+</sup>).

| [Q] <sup>+</sup>    | Q[EuL <sub>4</sub> ]             |                                  |                                  | Q[TbL <sub>4</sub> ]             |                                  |                                  |
|---------------------|----------------------------------|----------------------------------|----------------------------------|----------------------------------|----------------------------------|----------------------------------|
|                     | [NMe <sub>4</sub> ] <sup>+</sup> | [NEt <sub>4</sub> ] <sup>+</sup> | [PPh <sub>4</sub> ] <sup>+</sup> | [NMe <sub>4</sub> ] <sup>+</sup> | [NEt <sub>4</sub> ] <sup>+</sup> | [PPh <sub>4</sub> ] <sup>+</sup> |
| $\Omega_2$<br>(FED) | 4.264<br>(0.036)                 | 4.556<br>(0.010)                 | 12.858<br>(0.013)                | 3.557<br>(0.023)                 | 3.716<br>(0.022)                 | 10.578<br>(0.008)                |
| $\Omega_4$<br>(FED) | 6.886<br>(0.312)                 | 6.064<br>(0.241)                 | 5.784<br>(0.162)                 | 5.036<br>(0.165)                 | 6.768<br>(0.190)                 | 4.315<br>(0.085)                 |
| $\Omega_6$<br>(FED) | 1.912<br>(0.600)                 | 1.758<br>(0.463)                 | 1.797<br>(0.326)                 | 1.111<br>(0.301)                 | 1.400<br>(0.371)                 | 1.086<br>(0.163)                 |

**Table S6.** Values of effective polarizability ( $\alpha'$  in  $\text{\AA}^3$ ) and charge factors  $g$  (dimensionless) obtained for different coordinated oxygen, O=C (1) and O=P (2), as illustrated in the structure fragment below.

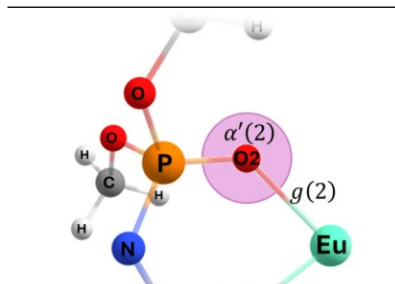

|                                      | $\alpha'(1)$ | $\alpha'(2)$ | $g(1)$ | $g(2)$ |
|--------------------------------------|--------------|--------------|--------|--------|
| NMe <sub>4</sub> [EuL <sub>4</sub> ] | 0.566        | 0.732        | 0.881  | 0.938  |
| NEt <sub>4</sub> [EuL <sub>4</sub> ] | 0.354        | 0.744        | 0.869  | 0.774  |
| PPh <sub>4</sub> [EuL <sub>4</sub> ] | 0.241        | 0.899        | 0.705  | 0.639  |

Tables S7–S18 present the energy transfer rates calculated using the JOYSpectra web platform [8] (<http://www.joyspectra.website>). In these tables,  $\Delta$  represents the donor–acceptor energy difference between donor and acceptor transitions.  $W_{d-d}$ ,  $W_{d-m}$ , and  $W_{ex}$  denote the energy transfer by the dipole–dipole, dipole–multipole, and exchange mechanisms, respectively.  $W$  is the sum of all mechanisms for a given pathway ( $p$ ). The forward (ligand-to-Ln) rates perspective,  $W^S$  represents the sum over  $W$  involving the S<sub>1</sub> as a donor, while  $W^T$  is the sum over  $W$  involving the T<sub>1</sub> as a donor state. From the backward (Ln-to-ligand) rates,  $W_b^S$  is the sum over  $W_b$  involving the S<sub>1</sub> as an acceptor, while  $W_b^T$  is the sum over  $W_b$  involving the T<sub>1</sub> as the acceptor state.

**Table S7.** Forward (ligand-to-Eu) IET rates for  $\text{NMe}_4[\text{EuL}_4]$ .

| $p$ | donor                 | acceptor                      | contr. (%) | $\Delta$ (cm <sup>-1</sup> ) | $W$ (s <sup>-1</sup> )       | $W_{d-d}$ (s <sup>-1</sup> ) | $W_{d-m}$ (s <sup>-1</sup> ) | $W_{ex}$ (s <sup>-1</sup> ) |
|-----|-----------------------|-------------------------------|------------|------------------------------|------------------------------|------------------------------|------------------------------|-----------------------------|
| 1   | $S_1 \rightarrow S_0$ | ${}^7F_0 \rightarrow {}^5D_0$ | 0.0        | 20707                        | 2.6E-01                      | 1.6E-05                      | 2.6E-01                      | 0.0E+00                     |
| 2   | $S_1 \rightarrow S_0$ | ${}^7F_0 \rightarrow {}^5D_1$ | 0.2        | 18973                        | 1.2E+03                      | 0.0E+00                      | 0.0E+00                      | 1.2E+03                     |
| 3   | $S_1 \rightarrow S_0$ | ${}^7F_0 \rightarrow {}^5D_2$ | 0.0        | 16517                        | 0.0E+00                      | 0.0E+00                      | 0.0E+00                      | 0.0E+00                     |
| 4   | $S_1 \rightarrow S_0$ | ${}^7F_0 \rightarrow {}^5L_6$ | 1.0        | 12675                        | 4.7E+03                      | 4.4E+03                      | 3.0E+02                      | 0.0E+00                     |
| 5   | $S_1 \rightarrow S_0$ | ${}^7F_0 \rightarrow {}^5G_6$ | 1.1        | 11248                        | 5.0E+03                      | 4.6E+03                      | 3.2E+02                      | 0.0E+00                     |
| 6   | $S_1 \rightarrow S_0$ | ${}^7F_0 \rightarrow {}^5D_4$ | 3.2        | 10414                        | 1.5E+04                      | 1.6E+03                      | 1.3E+04                      | 0.0E+00                     |
| 7   | $S_1 \rightarrow S_0$ | ${}^7F_1 \rightarrow {}^5D_0$ | 0.0        | 21079                        | 8.5E+00                      | 0.0E+00                      | 0.0E+00                      | 8.5E+00                     |
| 8   | $S_1 \rightarrow S_0$ | ${}^7F_1 \rightarrow {}^5D_1$ | 0.0        | 19345                        | 4.6E+00                      | 2.8E-04                      | 4.6E+00                      | 4.2E-02                     |
| 9   | $S_1 \rightarrow S_0$ | ${}^7F_1 \rightarrow {}^5D_2$ | 0.1        | 16889                        | 3.3E+02                      | 0.0E+00                      | 0.0E+00                      | 3.3E+02                     |
| 10  | $S_1 \rightarrow S_0$ | ${}^7F_1 \rightarrow {}^5D_3$ | 0.4        | 14017                        | 1.6E+03                      | 2.6E+00                      | 1.6E+03                      | 0.0E+00                     |
| 11  | $S_1 \rightarrow S_0$ | ${}^7F_1 \rightarrow {}^5L_6$ | 0.0        | 13047                        | 1.2E+02                      | 1.1E+02                      | 7.9E+00                      | 0.0E+00                     |
| 12  | $S_1 \rightarrow S_0$ | ${}^7F_1 \rightarrow {}^5L_7$ | 0.2        | 12015                        | 7.4E+02                      | 7.0E+02                      | 4.8E+01                      | 0.0E+00                     |
| 13  | $S_1 \rightarrow S_0$ | ${}^7F_1 \rightarrow {}^5G_2$ | 91.3       | 11980                        | 4.2E+05                      | 0.0E+00                      | 0.0E+00                      | 4.2E+05                     |
| 14  | $S_1 \rightarrow S_0$ | ${}^7F_1 \rightarrow {}^5G_3$ | 2.3        | 11750                        | 1.0E+04                      | 3.2E+01                      | 1.0E+04                      | 0.0E+00                     |
| 15  | $S_1 \rightarrow S_0$ | ${}^7F_1 \rightarrow {}^5G_6$ | 0.1        | 11620                        | 3.0E+02                      | 2.8E+02                      | 1.9E+01                      | 0.0E+00                     |
| 16  | $S_1 \rightarrow S_0$ | ${}^7F_1 \rightarrow {}^5G_5$ | 0.2        | 11609                        | 7.2E+02                      | 5.8E+02                      | 1.4E+02                      | 0.0E+00                     |
|     |                       |                               |            | $W^S$                        | 4.6 $\times$ 10 <sup>5</sup> |                              |                              |                             |
| 17  | $T_1 \rightarrow S_0$ | ${}^7F_0 \rightarrow {}^5D_0$ | 0.0        | 5296                         | 3.6E+02                      | 2.2E-02                      | 3.6E+02                      | 0.0E+00                     |
| 18  | $T_1 \rightarrow S_0$ | ${}^7F_0 \rightarrow {}^5D_1$ | 84.6       | 3562                         | 1.2E+09                      | 0.0E+00                      | 0.0E+00                      | 1.2E+09                     |
| 19  | $T_1 \rightarrow S_0$ | ${}^7F_0 \rightarrow {}^5D_2$ | 0.0        | 1106                         | 0.0E+00                      | 0.0E+00                      | 0.0E+00                      | 0.0E+00                     |
| 20  | $T_1 \rightarrow S_0$ | ${}^7F_0 \rightarrow {}^5L_6$ | 0.0        | -2736                        | 1.9E-04                      | 1.8E-04                      | 1.2E-05                      | 0.0E+00                     |
| 21  | $T_1 \rightarrow S_0$ | ${}^7F_0 \rightarrow {}^5G_6$ | 0.0        | -4163                        | 3.6E-08                      | 3.4E-08                      | 2.3E-09                      | 0.0E+00                     |
| 22  | $T_1 \rightarrow S_0$ | ${}^7F_0 \rightarrow {}^5D_4$ | 0.0        | -4997                        | 7.2E-10                      | 7.6E-11                      | 6.4E-10                      | 0.0E+00                     |
| 23  | $T_1 \rightarrow S_0$ | ${}^7F_1 \rightarrow {}^5D_0$ | 14.1       | 5668                         | 2.1E+08                      | 0.0E+00                      | 0.0E+00                      | 2.1E+08                     |
| 24  | $T_1 \rightarrow S_0$ | ${}^7F_1 \rightarrow {}^5D_1$ | 0.0        | 3934                         | 7.9E+04                      | 5.2E-02                      | 8.5E+02                      | 7.8E+04                     |
| 25  | $T_1 \rightarrow S_0$ | ${}^7F_1 \rightarrow {}^5D_2$ | 1.3        | 1478                         | 1.8E+07                      | 0.0E+00                      | 0.0E+00                      | 1.8E+07                     |
| 26  | $T_1 \rightarrow S_0$ | ${}^7F_1 \rightarrow {}^5D_3$ | 0.0        | -1394                        | 2.4E-01                      | 3.9E-04                      | 2.4E-01                      | 0.0E+00                     |
| 27  | $T_1 \rightarrow S_0$ | ${}^7F_1 \rightarrow {}^5L_6$ | 0.0        | -2364                        | 4.8E-05                      | 4.5E-05                      | 3.0E-06                      | 0.0E+00                     |
| 28  | $T_1 \rightarrow S_0$ | ${}^7F_1 \rightarrow {}^5L_7$ | 0.0        | -3396                        | 5.6E-07                      | 5.3E-07                      | 3.5E-08                      | 0.0E+00                     |
| 29  | $T_1 \rightarrow S_0$ | ${}^7F_1 \rightarrow {}^5G_2$ | 0.0        | -3431                        | 2.6E+00                      | 0.0E+00                      | 0.0E+00                      | 2.6E+00                     |
| 30  | $T_1 \rightarrow S_0$ | ${}^7F_1 \rightarrow {}^5G_3$ | 0.0        | -3661                        | 1.6E-06                      | 4.9E-09                      | 1.6E-06                      | 0.0E+00                     |
| 31  | $T_1 \rightarrow S_0$ | ${}^7F_1 \rightarrow {}^5G_6$ | 0.0        | -3791                        | 2.1E-08                      | 2.0E-08                      | 1.3E-09                      | 0.0E+00                     |
| 32  | $T_1 \rightarrow S_0$ | ${}^7F_1 \rightarrow {}^5G_5$ | 0.0        | -3802                        | 4.7E-08                      | 3.7E-08                      | 9.1E-09                      | 0.0E+00                     |
|     |                       |                               |            | $W^T$                        | 1.5 $\times$ 10 <sup>9</sup> |                              |                              |                             |



**Table S8.** Backward (Eu-to-ligand) IET rates for **NMe<sub>4</sub>[EuL<sub>4</sub>]**.

| <i>p</i> | donor                                                     | acceptor                       | contr. (%) | $\Delta$ (cm <sup>-1</sup> ) | $W_b$ (s <sup>-1</sup> ) | $W_{d-d}$ (s <sup>-1</sup> ) | $W_{d-m}$ (s <sup>-1</sup> ) | $W_{ex}$ (s <sup>-1</sup> ) |
|----------|-----------------------------------------------------------|--------------------------------|------------|------------------------------|--------------------------|------------------------------|------------------------------|-----------------------------|
| 1        | <sup>5</sup> D <sub>0</sub> → <sup>7</sup> F <sub>0</sub> | S <sub>0</sub> →S <sub>1</sub> | 0.0        | -20707                       | 1.3E-44                  | 7.6E-49                      | 1.3E-44                      | 0.0E+00                     |
| 2        | <sup>5</sup> D <sub>1</sub> → <sup>7</sup> F <sub>0</sub> | S <sub>0</sub> →S <sub>1</sub> | 0.0        | -18973                       | 8.0E-38                  | 0.0E+00                      | 0.0E+00                      | 8.0E-38                     |
| 3        | <sup>5</sup> D <sub>2</sub> → <sup>7</sup> F <sub>0</sub> | S <sub>0</sub> →S <sub>1</sub> | 0.0        | -16517                       | 0.0E+00                  | 0.0E+00                      | 0.0E+00                      | 0.0E+00                     |
| 4        | <sup>5</sup> L <sub>6</sub> → <sup>7</sup> F <sub>0</sub> | S <sub>0</sub> →S <sub>1</sub> | 0.0        | -12675                       | 1.2E-24                  | 1.1E-24                      | 7.6E-26                      | 0.0E+00                     |
| 5        | <sup>5</sup> G <sub>6</sub> → <sup>7</sup> F <sub>0</sub> | S <sub>0</sub> →S <sub>1</sub> | 0.3        | -11248                       | 1.2E-21                  | 1.1E-21                      | 7.9E-23                      | 0.0E+00                     |
| 6        | <sup>5</sup> D <sub>4</sub> → <sup>7</sup> F <sub>0</sub> | S <sub>0</sub> →S <sub>1</sub> | 70.0       | -10414                       | 3.0E-19                  | 3.1E-20                      | 2.7E-19                      | 0.0E+00                     |
| 7        | <sup>5</sup> D <sub>0</sub> → <sup>7</sup> F <sub>1</sub> | S <sub>0</sub> →S <sub>1</sub> | 0.0        | -21079                       | 1.0E-42                  | 0.0E+00                      | 0.0E+00                      | 1.0E-42                     |
| 8        | <sup>5</sup> D <sub>1</sub> → <sup>7</sup> F <sub>1</sub> | S <sub>0</sub> →S <sub>1</sub> | 0.0        | -19345                       | 8.0E-40                  | 4.8E-44                      | 7.9E-40                      | 7.3E-42                     |
| 9        | <sup>5</sup> D <sub>2</sub> → <sup>7</sup> F <sub>1</sub> | S <sub>0</sub> →S <sub>1</sub> | 0.0        | -16889                       | 4.8E-33                  | 0.0E+00                      | 0.0E+00                      | 4.8E-33                     |
| 10       | <sup>5</sup> D <sub>3</sub> → <sup>7</sup> F <sub>1</sub> | S <sub>0</sub> →S <sub>1</sub> | 0.0        | -14017                       | 1.8E-26                  | 2.8E-29                      | 1.8E-26                      | 0.0E+00                     |
| 11       | <sup>5</sup> L <sub>6</sub> → <sup>7</sup> F <sub>1</sub> | S <sub>0</sub> →S <sub>1</sub> | 0.0        | -13047                       | 7.7E-26                  | 7.2E-26                      | 5.0E-27                      | 0.0E+00                     |
| 12       | <sup>5</sup> L <sub>7</sub> → <sup>7</sup> F <sub>1</sub> | S <sub>0</sub> →S <sub>1</sub> | 0.0        | -12015                       | 5.9E-23                  | 5.5E-23                      | 3.8E-24                      | 0.0E+00                     |
| 13       | <sup>5</sup> G <sub>2</sub> → <sup>7</sup> F <sub>1</sub> | S <sub>0</sub> →S <sub>1</sub> | 28.0       | -11980                       | 1.2E-19                  | 0.0E+00                      | 0.0E+00                      | 1.2E-19                     |
| 14       | <sup>5</sup> G <sub>3</sub> → <sup>7</sup> F <sub>1</sub> | S <sub>0</sub> →S <sub>1</sub> | 1.5        | -11750                       | 6.4E-21                  | 2.0E-23                      | 6.4E-21                      | 0.0E+00                     |
| 15       | <sup>5</sup> G <sub>6</sub> → <sup>7</sup> F <sub>1</sub> | S <sub>0</sub> →S <sub>1</sub> | 0.0        | -11620                       | 1.9E-22                  | 1.7E-22                      | 1.2E-23                      | 0.0E+00                     |
| 16       | <sup>5</sup> G <sub>5</sub> → <sup>7</sup> F <sub>1</sub> | S <sub>0</sub> →S <sub>1</sub> | 0.1        | -11609                       | 5.5E-22                  | 4.4E-22                      | 1.1E-22                      | 0.0E+00                     |
|          |                                                           |                                |            | $W_b^S$                      | 4×10 <sup>-19</sup>      |                              |                              |                             |
| 17       | <sup>5</sup> D <sub>0</sub> → <sup>7</sup> F <sub>0</sub> | S <sub>0</sub> →T <sub>1</sub> | 0.0        | -5296                        | 3.5E-09                  | 2.1E-13                      | 3.5E-09                      | 0.0E+00                     |
| 18       | <sup>5</sup> D <sub>1</sub> → <sup>7</sup> F <sub>0</sub> | S <sub>0</sub> →T <sub>1</sub> | 0.0        | -3562                        | 1.7E+01                  | 0.0E+00                      | 0.0E+00                      | 1.7E+01                     |
| 19       | <sup>5</sup> D <sub>2</sub> → <sup>7</sup> F <sub>0</sub> | S <sub>0</sub> →T <sub>1</sub> | 0.0        | -1106                        | 0.0E+00                  | 0.0E+00                      | 0.0E+00                      | 0.0E+00                     |
| 20       | <sup>5</sup> L <sub>6</sub> → <sup>7</sup> F <sub>0</sub> | S <sub>0</sub> →T <sub>1</sub> | 0.0        | 2736                         | 9.6E+00                  | 9.0E+00                      | 6.1E-01                      | 0.0E+00                     |
| 21       | <sup>5</sup> G <sub>6</sub> → <sup>7</sup> F <sub>0</sub> | S <sub>0</sub> →T <sub>1</sub> | 0.0        | 4163                         | 1.8E+00                  | 1.7E+00                      | 1.1E-01                      | 0.0E+00                     |
| 22       | <sup>5</sup> D <sub>4</sub> → <sup>7</sup> F <sub>0</sub> | S <sub>0</sub> →T <sub>1</sub> | 0.0        | 4997                         | 2.8E+00                  | 3.0E-01                      | 2.5E+00                      | 0.0E+00                     |
| 23       | <sup>5</sup> D <sub>0</sub> → <sup>7</sup> F <sub>1</sub> | S <sub>0</sub> →T <sub>1</sub> | 0.0        | -5668                        | 4.9E-03                  | 0.0E+00                      | 0.0E+00                      | 4.9E-03                     |
| 24       | <sup>5</sup> D <sub>1</sub> → <sup>7</sup> F <sub>1</sub> | S <sub>0</sub> →T <sub>1</sub> | 0.0        | -3934                        | 2.7E-03                  | 1.8E-09                      | 2.9E-05                      | 2.7E-03                     |
| 25       | <sup>5</sup> D <sub>2</sub> → <sup>7</sup> F <sub>1</sub> | S <sub>0</sub> →T <sub>1</sub> | 0.0        | -1478                        | 5.3E+04                  | 0.0E+00                      | 0.0E+00                      | 5.3E+04                     |
| 26       | <sup>5</sup> D <sub>3</sub> → <sup>7</sup> F <sub>1</sub> | S <sub>0</sub> →T <sub>1</sub> | 0.0        | 1394                         | 5.2E+02                  | 8.3E-01                      | 5.2E+02                      | 0.0E+00                     |
| 27       | <sup>5</sup> L <sub>6</sub> → <sup>7</sup> F <sub>1</sub> | S <sub>0</sub> →T <sub>1</sub> | 0.0        | 2364                         | 6.0E+00                  | 5.7E+00                      | 3.8E-01                      | 0.0E+00                     |
| 28       | <sup>5</sup> L <sub>7</sub> → <sup>7</sup> F <sub>1</sub> | S <sub>0</sub> →T <sub>1</sub> | 0.0        | 3396                         | 8.8E+00                  | 8.3E+00                      | 5.6E-01                      | 0.0E+00                     |
| 29       | <sup>5</sup> G <sub>2</sub> → <sup>7</sup> F <sub>1</sub> | S <sub>0</sub> →T <sub>1</sub> | 100.0      | 3431                         | 1.4E+08                  | 0.0E+00                      | 0.0E+00                      | 1.4E+08                     |
| 30       | <sup>5</sup> G <sub>3</sub> → <sup>7</sup> F <sub>1</sub> | S <sub>0</sub> →T <sub>1</sub> | 0.0        | 3661                         | 1.9E+02                  | 5.9E-01                      | 1.9E+02                      | 0.0E+00                     |
| 31       | <sup>5</sup> G <sub>6</sub> → <sup>7</sup> F <sub>1</sub> | S <sub>0</sub> →T <sub>1</sub> | 0.0        | 3791                         | 2.6E+00                  | 2.4E+00                      | 1.6E-01                      | 0.0E+00                     |
| 32       | <sup>5</sup> G <sub>5</sub> → <sup>7</sup> F <sub>1</sub> | S <sub>0</sub> →T <sub>1</sub> | 0.0        | 3802                         | 7.1E+00                  | 5.7E+00                      | 1.4E+00                      | 0.0E+00                     |
|          |                                                           |                                |            | $W_b^T$                      | 1.4×10 <sup>8</sup>      |                              |                              |                             |

**Table S9.** Forward (ligand-to-Eu) IET rates for  $\text{NEt}_4[\text{EuL}_4]$ .

| $p$ | donor                          | acceptor                                                  | contr. (%) | $\Delta$ (cm <sup>-1</sup> ) | $W$ (s <sup>-1</sup> ) | $W_{d-d}$ (s <sup>-1</sup> ) | $W_{d-m}$ (s <sup>-1</sup> ) | $W_{ex}$ (s <sup>-1</sup> ) |
|-----|--------------------------------|-----------------------------------------------------------|------------|------------------------------|------------------------|------------------------------|------------------------------|-----------------------------|
| 1   | S <sub>1</sub> →S <sub>0</sub> | <sup>7</sup> F <sub>0</sub> → <sup>5</sup> D <sub>0</sub> | 0.0        | 20707                        | 6.6E-02                | 5.2E-06                      | 6.6E-02                      | 0.0E+00                     |
| 2   | S <sub>1</sub> →S <sub>0</sub> | <sup>7</sup> F <sub>0</sub> → <sup>5</sup> D <sub>1</sub> | 0.2        | 18973                        | 1.8E+02                | 0.0E+00                      | 0.0E+00                      | 1.8E+02                     |
| 3   | S <sub>1</sub> →S <sub>0</sub> | <sup>7</sup> F <sub>0</sub> → <sup>5</sup> D <sub>2</sub> | 0.0        | 16517                        | 0.0E+00                | 0.0E+00                      | 0.0E+00                      | 0.0E+00                     |
| 4   | S <sub>1</sub> →S <sub>0</sub> | <sup>7</sup> F <sub>0</sub> → <sup>5</sup> L <sub>6</sub> | 2.5        | 12675                        | 1.9E+03                | 1.9E+03                      | 2.0E+01                      | 0.0E+00                     |
| 5   | S <sub>1</sub> →S <sub>0</sub> | <sup>7</sup> F <sub>0</sub> → <sup>5</sup> G <sub>6</sub> | 2.7        | 11248                        | 2.1E+03                | 2.0E+03                      | 2.1E+01                      | 0.0E+00                     |
| 6   | S <sub>1</sub> →S <sub>0</sub> | <sup>7</sup> F <sub>0</sub> → <sup>5</sup> D <sub>4</sub> | 3.2        | 10414                        | 2.4E+03                | 6.5E+02                      | 1.8E+03                      | 0.0E+00                     |
| 7   | S <sub>1</sub> →S <sub>0</sub> | <sup>7</sup> F <sub>1</sub> → <sup>5</sup> D <sub>0</sub> | 0.0        | 21079                        | 1.3E+00                | 0.0E+00                      | 0.0E+00                      | 1.3E+00                     |
| 8   | S <sub>1</sub> →S <sub>0</sub> | <sup>7</sup> F <sub>1</sub> → <sup>5</sup> D <sub>1</sub> | 0.0        | 19345                        | 1.2E+00                | 9.2E-05                      | 1.2E+00                      | 6.6E-03                     |
| 9   | S <sub>1</sub> →S <sub>0</sub> | <sup>7</sup> F <sub>1</sub> → <sup>5</sup> D <sub>2</sub> | 0.1        | 16889                        | 5.1E+01                | 0.0E+00                      | 0.0E+00                      | 5.1E+01                     |
| 10  | S <sub>1</sub> →S <sub>0</sub> | <sup>7</sup> F <sub>1</sub> → <sup>5</sup> D <sub>3</sub> | 0.5        | 14017                        | 4.2E+02                | 1.1E+00                      | 4.1E+02                      | 0.0E+00                     |
| 11  | S <sub>1</sub> →S <sub>0</sub> | <sup>7</sup> F <sub>1</sub> → <sup>5</sup> L <sub>6</sub> | 0.1        | 13047                        | 5.1E+01                | 5.0E+01                      | 5.3E-01                      | 0.0E+00                     |
| 12  | S <sub>1</sub> →S <sub>0</sub> | <sup>7</sup> F <sub>1</sub> → <sup>5</sup> L <sub>7</sub> | 0.4        | 12015                        | 3.1E+02                | 3.1E+02                      | 3.2E+00                      | 0.0E+00                     |
| 13  | S <sub>1</sub> →S <sub>0</sub> | <sup>7</sup> F <sub>1</sub> → <sup>5</sup> G <sub>2</sub> | 86.3       | 11980                        | 6.6E+04                | 0.0E+00                      | 0.0E+00                      | 6.6E+04                     |
| 14  | S <sub>1</sub> →S <sub>0</sub> | <sup>7</sup> F <sub>1</sub> → <sup>5</sup> G <sub>3</sub> | 3.4        | 11750                        | 2.6E+03                | 1.3E+01                      | 2.6E+03                      | 0.0E+00                     |
| 15  | S <sub>1</sub> →S <sub>0</sub> | <sup>7</sup> F <sub>1</sub> → <sup>5</sup> G <sub>6</sub> | 0.2        | 11620                        | 1.3E+02                | 1.2E+02                      | 1.3E+00                      | 0.0E+00                     |
| 16  | S <sub>1</sub> →S <sub>0</sub> | <sup>7</sup> F <sub>1</sub> → <sup>5</sup> G <sub>5</sub> | 0.4        | 11609                        | 2.7E+02                | 2.5E+02                      | 1.6E+01                      | 0.0E+00                     |
|     |                                |                                                           |            | $W^S$                        | 7.6×10 <sup>4</sup>    |                              |                              |                             |
| 17  | T <sub>1</sub> →S <sub>0</sub> | <sup>7</sup> F <sub>0</sub> → <sup>5</sup> D <sub>0</sub> | 0.0        | 4918                         | 9.4E+01                | 7.6E-03                      | 9.4E+01                      | 0.0E+00                     |
| 18  | T <sub>1</sub> →S <sub>0</sub> | <sup>7</sup> F <sub>0</sub> → <sup>5</sup> D <sub>1</sub> | 84.9       | 3184                         | 1.9E+08                | 0.0E+00                      | 0.0E+00                      | 1.9E+08                     |
| 19  | T <sub>1</sub> →S <sub>0</sub> | <sup>7</sup> F <sub>0</sub> → <sup>5</sup> D <sub>2</sub> | 0.0        | 728                          | 0.0E+00                | 0.0E+00                      | 0.0E+00                      | 0.0E+00                     |
| 20  | T <sub>1</sub> →S <sub>0</sub> | <sup>7</sup> F <sub>0</sub> → <sup>5</sup> L <sub>6</sub> | 0.0        | -3114                        | 1.2E-05                | 1.2E-05                      | 1.1E-07                      | 0.0E+00                     |
| 21  | T <sub>1</sub> →S <sub>0</sub> | <sup>7</sup> F <sub>0</sub> → <sup>5</sup> G <sub>6</sub> | 0.0        | -4541                        | 2.1E-09                | 2.1E-09                      | 2.0E-11                      | 0.0E+00                     |
| 22  | T <sub>1</sub> →S <sub>0</sub> | <sup>7</sup> F <sub>0</sub> → <sup>5</sup> D <sub>4</sub> | 0.0        | -5375                        | 1.5E-11                | 4.2E-12                      | 1.1E-11                      | 0.0E+00                     |
| 23  | T <sub>1</sub> →S <sub>0</sub> | <sup>7</sup> F <sub>1</sub> → <sup>5</sup> D <sub>0</sub> | 13.8       | 5290                         | 3.2E+07                | 0.0E+00                      | 0.0E+00                      | 3.2E+07                     |
| 24  | T <sub>1</sub> →S <sub>0</sub> | <sup>7</sup> F <sub>1</sub> → <sup>5</sup> D <sub>1</sub> | 0.0        | 3556                         | 1.2E+04                | 1.8E-02                      | 2.2E+02                      | 1.2E+04                     |
| 25  | T <sub>1</sub> →S <sub>0</sub> | <sup>7</sup> F <sub>1</sub> → <sup>5</sup> D <sub>2</sub> | 1.2        | 1100                         | 2.9E+06                | 0.0E+00                      | 0.0E+00                      | 2.9E+06                     |
| 26  | T <sub>1</sub> →S <sub>0</sub> | <sup>7</sup> F <sub>1</sub> → <sup>5</sup> D <sub>3</sub> | 0.0        | -1772                        | 9.4E-03                | 2.5E-05                      | 9.3E-03                      | 0.0E+00                     |
| 27  | T <sub>1</sub> →S <sub>0</sub> | <sup>7</sup> F <sub>1</sub> → <sup>5</sup> L <sub>6</sub> | 0.0        | -2742                        | 3.0E-06                | 3.0E-06                      | 2.8E-08                      | 0.0E+00                     |
| 28  | T <sub>1</sub> →S <sub>0</sub> | <sup>7</sup> F <sub>1</sub> → <sup>5</sup> L <sub>7</sub> | 0.0        | -3774                        | 3.4E-08                | 3.3E-08                      | 3.1E-10                      | 0.0E+00                     |
| 29  | T <sub>1</sub> →S <sub>0</sub> | <sup>7</sup> F <sub>1</sub> → <sup>5</sup> G <sub>2</sub> | 0.0        | -3809                        | 5.5E-02                | 0.0E+00                      | 0.0E+00                      | 5.5E-02                     |
| 30  | T <sub>1</sub> →S <sub>0</sub> | <sup>7</sup> F <sub>1</sub> → <sup>5</sup> G <sub>3</sub> | 0.0        | -4039                        | 5.6E-08                | 2.9E-10                      | 5.5E-08                      | 0.0E+00                     |
| 31  | T <sub>1</sub> →S <sub>0</sub> | <sup>7</sup> F <sub>1</sub> → <sup>5</sup> G <sub>6</sub> | 0.0        | -4169                        | 1.2E-09                | 1.2E-09                      | 1.1E-11                      | 0.0E+00                     |
| 32  | T <sub>1</sub> →S <sub>0</sub> | <sup>7</sup> F <sub>1</sub> → <sup>5</sup> G <sub>5</sub> | 0.0        | -4180                        | 2.5E-09                | 2.3E-09                      | 1.4E-10                      | 0.0E+00                     |
|     |                                |                                                           |            | $W^T$                        | 2.3×10 <sup>8</sup>    |                              |                              |                             |

**Table S10.** Backward (Eu-to-ligand) IET rates for **NEt<sub>4</sub>[EuL<sub>4</sub>]**.

| <i>p</i> | donor                                                     | acceptor                       | contr. (%) | $\Delta$ (cm <sup>-1</sup> ) | $W_b$ (s <sup>-1</sup> ) | $W_{d-d}$ (s <sup>-1</sup> ) | $W_{d-m}$ (s <sup>-1</sup> ) | $W_{ex}$ (s <sup>-1</sup> ) |
|----------|-----------------------------------------------------------|--------------------------------|------------|------------------------------|--------------------------|------------------------------|------------------------------|-----------------------------|
| 1        | <sup>5</sup> D <sub>0</sub> → <sup>7</sup> F <sub>0</sub> | S <sub>0</sub> →S <sub>1</sub> | 0.0        | -20707                       | 3.2E-45                  | 2.5E-49                      | 3.2E-45                      | 0.0E+00                     |
| 2        | <sup>5</sup> D <sub>1</sub> → <sup>7</sup> F <sub>0</sub> | S <sub>0</sub> →S <sub>1</sub> | 0.0        | -18973                       | 1.2E-38                  | 0.0E+00                      | 0.0E+00                      | 1.2E-38                     |
| 3        | <sup>5</sup> D <sub>2</sub> → <sup>7</sup> F <sub>0</sub> | S <sub>0</sub> →S <sub>1</sub> | 0.0        | -16517                       | 0.0E+00                  | 0.0E+00                      | 0.0E+00                      | 0.0E+00                     |
| 4        | <sup>5</sup> L <sub>6</sub> → <sup>7</sup> F <sub>0</sub> | S <sub>0</sub> →S <sub>1</sub> | 0.0        | -12675                       | 4.9E-25                  | 4.9E-25                      | 5.1E-27                      | 0.0E+00                     |
| 5        | <sup>5</sup> G <sub>6</sub> → <sup>7</sup> F <sub>0</sub> | S <sub>0</sub> →S <sub>1</sub> | 0.7        | -11248                       | 5.1E-22                  | 5.1E-22                      | 5.3E-24                      | 0.0E+00                     |
| 6        | <sup>5</sup> D <sub>4</sub> → <sup>7</sup> F <sub>0</sub> | S <sub>0</sub> →S <sub>1</sub> | 69.6       | -10414                       | 4.8E-20                  | 1.3E-20                      | 3.5E-20                      | 0.0E+00                     |
| 7        | <sup>5</sup> D <sub>0</sub> → <sup>7</sup> F <sub>1</sub> | S <sub>0</sub> →S <sub>1</sub> | 0.0        | -21079                       | 1.6E-43                  | 0.0E+00                      | 0.0E+00                      | 1.6E-43                     |
| 8        | <sup>5</sup> D <sub>1</sub> → <sup>7</sup> F <sub>1</sub> | S <sub>0</sub> →S <sub>1</sub> | 0.0        | -19345                       | 2.0E-40                  | 1.6E-44                      | 2.0E-40                      | 1.1E-42                     |
| 9        | <sup>5</sup> D <sub>2</sub> → <sup>7</sup> F <sub>1</sub> | S <sub>0</sub> →S <sub>1</sub> | 0.0        | -16889                       | 7.4E-34                  | 0.0E+00                      | 0.0E+00                      | 7.4E-34                     |
| 10       | <sup>5</sup> D <sub>3</sub> → <sup>7</sup> F <sub>1</sub> | S <sub>0</sub> →S <sub>1</sub> | 0.0        | -14017                       | 4.5E-27                  | 1.2E-29                      | 4.5E-27                      | 0.0E+00                     |
| 11       | <sup>5</sup> L <sub>6</sub> → <sup>7</sup> F <sub>1</sub> | S <sub>0</sub> →S <sub>1</sub> | 0.0        | -13047                       | 3.2E-26                  | 3.2E-26                      | 3.3E-28                      | 0.0E+00                     |
| 12       | <sup>5</sup> L <sub>7</sub> → <sup>7</sup> F <sub>1</sub> | S <sub>0</sub> →S <sub>1</sub> | 0.0        | -12015                       | 2.5E-23                  | 2.4E-23                      | 2.6E-25                      | 0.0E+00                     |
| 13       | <sup>5</sup> G <sub>2</sub> → <sup>7</sup> F <sub>1</sub> | S <sub>0</sub> →S <sub>1</sub> | 26.9       | -11980                       | 1.9E-20                  | 0.0E+00                      | 0.0E+00                      | 1.9E-20                     |
| 14       | <sup>5</sup> G <sub>3</sub> → <sup>7</sup> F <sub>1</sub> | S <sub>0</sub> →S <sub>1</sub> | 2.3        | -11750                       | 1.6E-21                  | 8.1E-24                      | 1.6E-21                      | 0.0E+00                     |
| 15       | <sup>5</sup> G <sub>6</sub> → <sup>7</sup> F <sub>1</sub> | S <sub>0</sub> →S <sub>1</sub> | 0.1        | -11620                       | 7.8E-23                  | 7.7E-23                      | 8.1E-25                      | 0.0E+00                     |
| 16       | <sup>5</sup> G <sub>5</sub> → <sup>7</sup> F <sub>1</sub> | S <sub>0</sub> →S <sub>1</sub> | 0.3        | -11609                       | 2.1E-22                  | 2.0E-22                      | 1.3E-23                      | 0.0E+00                     |
|          |                                                           |                                |            | $W_b^S$                      | $7\times 10^{-20}$       |                              |                              |                             |
| 17       | <sup>5</sup> D <sub>0</sub> → <sup>7</sup> F <sub>0</sub> | S <sub>0</sub> →T <sub>1</sub> | 0.0        | -4918                        | 5.5E-09                  | 4.5E-13                      | 5.5E-09                      | 0.0E+00                     |
| 18       | <sup>5</sup> D <sub>1</sub> → <sup>7</sup> F <sub>0</sub> | S <sub>0</sub> →T <sub>1</sub> | 0.0        | -3184                        | 1.6E+01                  | 0.0E+00                      | 0.0E+00                      | 1.6E+01                     |
| 19       | <sup>5</sup> D <sub>2</sub> → <sup>7</sup> F <sub>0</sub> | S <sub>0</sub> →T <sub>1</sub> | 0.0        | -728                         | 0.0E+00                  | 0.0E+00                      | 0.0E+00                      | 0.0E+00                     |
| 20       | <sup>5</sup> L <sub>6</sub> → <sup>7</sup> F <sub>0</sub> | S <sub>0</sub> →T <sub>1</sub> | 0.0        | 3114                         | 3.7E+00                  | 3.7E+00                      | 3.4E-02                      | 0.0E+00                     |
| 21       | <sup>5</sup> G <sub>6</sub> → <sup>7</sup> F <sub>0</sub> | S <sub>0</sub> →T <sub>1</sub> | 0.0        | 4541                         | 6.4E-01                  | 6.3E-01                      | 5.9E-03                      | 0.0E+00                     |
| 22       | <sup>5</sup> D <sub>4</sub> → <sup>7</sup> F <sub>0</sub> | S <sub>0</sub> →T <sub>1</sub> | 0.0        | 5375                         | 3.6E-01                  | 1.0E-01                      | 2.6E-01                      | 0.0E+00                     |
| 23       | <sup>5</sup> D <sub>0</sub> → <sup>7</sup> F <sub>1</sub> | S <sub>0</sub> →T <sub>1</sub> | 0.0        | -5290                        | 4.7E-03                  | 0.0E+00                      | 0.0E+00                      | 4.7E-03                     |
| 24       | <sup>5</sup> D <sub>1</sub> → <sup>7</sup> F <sub>1</sub> | S <sub>0</sub> →T <sub>1</sub> | 0.0        | -3556                        | 2.6E-03                  | 3.8E-09                      | 4.7E-05                      | 2.6E-03                     |
| 25       | <sup>5</sup> D <sub>2</sub> → <sup>7</sup> F <sub>1</sub> | S <sub>0</sub> →T <sub>1</sub> | 0.3        | -1100                        | 5.1E+04                  | 0.0E+00                      | 0.0E+00                      | 5.1E+04                     |
| 26       | <sup>5</sup> D <sub>3</sub> → <sup>7</sup> F <sub>1</sub> | S <sub>0</sub> →T <sub>1</sub> | 0.0        | 1772                         | 1.2E+02                  | 3.3E-01                      | 1.2E+02                      | 0.0E+00                     |
| 27       | <sup>5</sup> L <sub>6</sub> → <sup>7</sup> F <sub>1</sub> | S <sub>0</sub> →T <sub>1</sub> | 0.0        | 2742                         | 2.4E+00                  | 2.3E+00                      | 2.2E-02                      | 0.0E+00                     |
| 28       | <sup>5</sup> L <sub>7</sub> → <sup>7</sup> F <sub>1</sub> | S <sub>0</sub> →T <sub>1</sub> | 0.0        | 3774                         | 3.3E+00                  | 3.3E+00                      | 3.1E-02                      | 0.0E+00                     |
| 29       | <sup>5</sup> G <sub>2</sub> → <sup>7</sup> F <sub>1</sub> | S <sub>0</sub> →T <sub>1</sub> | 99.7       | 3809                         | 1.9E+07                  | 0.0E+00                      | 0.0E+00                      | 1.9E+07                     |
| 30       | <sup>5</sup> G <sub>3</sub> → <sup>7</sup> F <sub>1</sub> | S <sub>0</sub> →T <sub>1</sub> | 0.0        | 4039                         | 4.2E+01                  | 2.1E-01                      | 4.2E+01                      | 0.0E+00                     |
| 31       | <sup>5</sup> G <sub>6</sub> → <sup>7</sup> F <sub>1</sub> | S <sub>0</sub> →T <sub>1</sub> | 0.0        | 4169                         | 9.3E-01                  | 9.2E-01                      | 8.7E-03                      | 0.0E+00                     |
| 32       | <sup>5</sup> G <sub>5</sub> → <sup>7</sup> F <sub>1</sub> | S <sub>0</sub> →T <sub>1</sub> | 0.0        | 4180                         | 2.3E+00                  | 2.2E+00                      | 1.3E-01                      | 0.0E+00                     |
|          |                                                           |                                |            | $W_b^T$                      | $1.9\times 10^7$         |                              |                              |                             |

**Table S11.** Forward (ligand-to-Eu) IET rates for **PPh<sub>4</sub>[EuL<sub>4</sub>]**.

| <i>p</i> | donor                          | acceptor                                                  | contr. (%) | $\Delta$ (cm <sup>-1</sup> ) | <i>W</i> (s <sup>-1</sup> ) | <i>W</i> <sub><i>d-d</i></sub> (s <sup>-1</sup> ) | <i>W</i> <sub><i>d-m</i></sub> (s <sup>-1</sup> ) | <i>W</i> <sub><i>ex</i></sub> (s <sup>-1</sup> ) |
|----------|--------------------------------|-----------------------------------------------------------|------------|------------------------------|-----------------------------|---------------------------------------------------|---------------------------------------------------|--------------------------------------------------|
| 1        | S <sub>1</sub> →S <sub>0</sub> | <sup>7</sup> F <sub>0</sub> → <sup>5</sup> D <sub>0</sub> | 0.0        | 17207                        | 6.4E-01                     | 4.5E-05                                           | 6.4E-01                                           | 0.0E+00                                          |
| 2        | S <sub>1</sub> →S <sub>0</sub> | <sup>7</sup> F <sub>0</sub> → <sup>5</sup> D <sub>1</sub> | 1.5        | 15473                        | 2.7E+02                     | 0.0E+00                                           | 0.0E+00                                           | 2.7E+02                                          |
| 3        | S <sub>1</sub> →S <sub>0</sub> | <sup>7</sup> F <sub>0</sub> → <sup>5</sup> D <sub>2</sub> | 0.0        | 13017                        | 0.0E+00                     | 0.0E+00                                           | 0.0E+00                                           | 0.0E+00                                          |
| 4        | S <sub>1</sub> →S <sub>0</sub> | <sup>7</sup> F <sub>0</sub> → <sup>5</sup> L <sub>6</sub> | 9.3        | 9175                         | 1.7E+03                     | 1.7E+03                                           | 5.2E-01                                           | 0.0E+00                                          |
| 5        | S <sub>1</sub> →S <sub>0</sub> | <sup>7</sup> F <sub>0</sub> → <sup>5</sup> G <sub>6</sub> | 6.4        | 7748                         | 1.2E+03                     | 1.2E+03                                           | 3.5E-01                                           | 0.0E+00                                          |
| 6        | S <sub>1</sub> →S <sub>0</sub> | <sup>7</sup> F <sub>0</sub> → <sup>5</sup> D <sub>4</sub> | 2.3        | 6914                         | 4.3E+02                     | 3.0E+02                                           | 1.3E+02                                           | 0.0E+00                                          |
| 7        | S <sub>1</sub> →S <sub>0</sub> | <sup>7</sup> F <sub>1</sub> → <sup>5</sup> D <sub>0</sub> | 0.0        | 17579                        | 3.8E+00                     | 0.0E+00                                           | 0.0E+00                                           | 3.8E+00                                          |
| 8        | S <sub>1</sub> →S <sub>0</sub> | <sup>7</sup> F <sub>1</sub> → <sup>5</sup> D <sub>1</sub> | 0.0        | 15845                        | 7.4E+00                     | 5.2E-04                                           | 7.4E+00                                           | 1.1E-02                                          |
| 9        | S <sub>1</sub> →S <sub>0</sub> | <sup>7</sup> F <sub>1</sub> → <sup>5</sup> D <sub>2</sub> | 0.2        | 13389                        | 4.1E+01                     | 0.0E+00                                           | 0.0E+00                                           | 4.1E+01                                          |
| 10       | S <sub>1</sub> →S <sub>0</sub> | <sup>7</sup> F <sub>1</sub> → <sup>5</sup> D <sub>3</sub> | 2.8        | 10517                        | 5.2E+02                     | 1.4E+00                                           | 5.2E+02                                           | 0.0E+00                                          |
| 11       | S <sub>1</sub> →S <sub>0</sub> | <sup>7</sup> F <sub>1</sub> → <sup>5</sup> L <sub>6</sub> | 0.3        | 9547                         | 5.0E+01                     | 5.0E+01                                           | 1.5E-02                                           | 0.0E+00                                          |
| 12       | S <sub>1</sub> →S <sub>0</sub> | <sup>7</sup> F <sub>1</sub> → <sup>5</sup> L <sub>7</sub> | 1.2        | 8515                         | 2.2E+02                     | 2.2E+02                                           | 6.7E-02                                           | 0.0E+00                                          |
| 13       | S <sub>1</sub> →S <sub>0</sub> | <sup>7</sup> F <sub>1</sub> → <sup>5</sup> G <sub>2</sub> | 65.5       | 8480                         | 1.2E+04                     | 0.0E+00                                           | 0.0E+00                                           | 1.2E+04                                          |
| 14       | S <sub>1</sub> →S <sub>0</sub> | <sup>7</sup> F <sub>1</sub> → <sup>5</sup> G <sub>3</sub> | 9.0        | 8250                         | 1.7E+03                     | 9.0E+00                                           | 1.7E+03                                           | 0.0E+00                                          |
| 15       | S <sub>1</sub> →S <sub>0</sub> | <sup>7</sup> F <sub>1</sub> → <sup>5</sup> G <sub>6</sub> | 0.4        | 8120                         | 8.0E+01                     | 8.0E+01                                           | 2.4E-02                                           | 0.0E+00                                          |
| 16       | S <sub>1</sub> →S <sub>0</sub> | <sup>7</sup> F <sub>1</sub> → <sup>5</sup> G <sub>5</sub> | 0.9        | 8109                         | 1.7E+02                     | 1.6E+02                                           | 1.5E+00                                           | 0.0E+00                                          |
|          |                                |                                                           |            | <i>W</i> <sup>S</sup>        | 1.8×10 <sup>4</sup>         |                                                   |                                                   |                                                  |
| 17       | T <sub>1</sub> →S <sub>0</sub> | <sup>7</sup> F <sub>0</sub> → <sup>5</sup> D <sub>0</sub> | 0.0        | 5497                         | 2.6E+00                     | 1.9E-04                                           | 2.6E+00                                           | 0.0E+00                                          |
| 18       | T <sub>1</sub> →S <sub>0</sub> | <sup>7</sup> F <sub>0</sub> → <sup>5</sup> D <sub>1</sub> | 84.9       | 3763                         | 1.5E+06                     | 0.0E+00                                           | 0.0E+00                                           | 1.5E+06                                          |
| 19       | T <sub>1</sub> →S <sub>0</sub> | <sup>7</sup> F <sub>0</sub> → <sup>5</sup> D <sub>2</sub> | 0.0        | 1307                         | 0.0E+00                     | 0.0E+00                                           | 0.0E+00                                           | 0.0E+00                                          |
| 20       | T <sub>1</sub> →S <sub>0</sub> | <sup>7</sup> F <sub>0</sub> → <sup>5</sup> L <sub>6</sub> | 0.0        | -2535                        | 7.0E-06                     | 7.0E-06                                           | 2.0E-09                                           | 0.0E+00                                          |
| 21       | T <sub>1</sub> →S <sub>0</sub> | <sup>7</sup> F <sub>0</sub> → <sup>5</sup> G <sub>6</sub> | 0.0        | -3962                        | 1.3E-09                     | 1.3E-09                                           | 3.8E-13                                           | 0.0E+00                                          |
| 22       | T <sub>1</sub> →S <sub>0</sub> | <sup>7</sup> F <sub>0</sub> → <sup>5</sup> D <sub>4</sub> | 0.0        | -4796                        | 4.1E-12                     | 2.9E-12                                           | 1.2E-12                                           | 0.0E+00                                          |
| 23       | T <sub>1</sub> →S <sub>0</sub> | <sup>7</sup> F <sub>1</sub> → <sup>5</sup> D <sub>0</sub> | 13.8       | 5869                         | 2.4E+05                     | 0.0E+00                                           | 0.0E+00                                           | 2.4E+05                                          |
| 24       | T <sub>1</sub> →S <sub>0</sub> | <sup>7</sup> F <sub>1</sub> → <sup>5</sup> D <sub>1</sub> | 0.0        | 4135                         | 1.0E+02                     | 4.5E-04                                           | 6.3E+00                                           | 9.4E+01                                          |
| 25       | T <sub>1</sub> →S <sub>0</sub> | <sup>7</sup> F <sub>1</sub> → <sup>5</sup> D <sub>2</sub> | 1.3        | 1679                         | 2.3E+04                     | 0.0E+00                                           | 0.0E+00                                           | 2.3E+04                                          |
| 26       | T <sub>1</sub> →S <sub>0</sub> | <sup>7</sup> F <sub>1</sub> → <sup>5</sup> D <sub>3</sub> | 0.0        | -1193                        | 4.9E-03                     | 1.4E-05                                           | 4.9E-03                                           | 0.0E+00                                          |
| 27       | T <sub>1</sub> →S <sub>0</sub> | <sup>7</sup> F <sub>1</sub> → <sup>5</sup> L <sub>6</sub> | 0.0        | -2163                        | 1.7E-06                     | 1.7E-06                                           | 5.0E-10                                           | 0.0E+00                                          |
| 28       | T <sub>1</sub> →S <sub>0</sub> | <sup>7</sup> F <sub>1</sub> → <sup>5</sup> L <sub>7</sub> | 0.0        | -3195                        | 2.0E-08                     | 2.0E-08                                           | 5.9E-12                                           | 0.0E+00                                          |
| 29       | T <sub>1</sub> →S <sub>0</sub> | <sup>7</sup> F <sub>1</sub> → <sup>5</sup> G <sub>2</sub> | 0.0        | -3230                        | 8.8E-03                     | 0.0E+00                                           | 0.0E+00                                           | 8.8E-03                                          |
| 30       | T <sub>1</sub> →S <sub>0</sub> | <sup>7</sup> F <sub>1</sub> → <sup>5</sup> G <sub>3</sub> | 0.0        | -3460                        | 3.3E-08                     | 1.8E-10                                           | 3.3E-08                                           | 0.0E+00                                          |
| 31       | T <sub>1</sub> →S <sub>0</sub> | <sup>7</sup> F <sub>1</sub> → <sup>5</sup> G <sub>6</sub> | 0.0        | -3590                        | 7.6E-10                     | 7.6E-10                                           | 2.2E-13                                           | 0.0E+00                                          |
| 32       | T <sub>1</sub> →S <sub>0</sub> | <sup>7</sup> F <sub>1</sub> → <sup>5</sup> G <sub>5</sub> | 0.0        | -3601                        | 1.5E-09                     | 1.5E-09                                           | 1.3E-11                                           | 0.0E+00                                          |
|          |                                |                                                           |            | <i>W</i> <sup>T</sup>        | 1.8×10 <sup>6</sup>         |                                                   |                                                   |                                                  |

**Table S12.** Backward (Eu-to-ligand) IET rates for **PPh<sub>4</sub>[EuL<sub>4</sub>]**.

| <i>p</i> | donor                                                     | acceptor                       | contr. (%) | $\Delta$ (cm <sup>-1</sup> ) | $W_b$ (s <sup>-1</sup> ) | $W_{d-d}$ (s <sup>-1</sup> ) | $W_{d-m}$ (s <sup>-1</sup> ) | $W_{ex}$ (s <sup>-1</sup> ) |
|----------|-----------------------------------------------------------|--------------------------------|------------|------------------------------|--------------------------|------------------------------|------------------------------|-----------------------------|
| 1        | <sup>5</sup> D <sub>0</sub> → <sup>7</sup> F <sub>0</sub> | S <sub>0</sub> →S <sub>1</sub> | 0.0        | -17207                       | 6.6E-37                  | 4.7E-41                      | 6.6E-37                      | 0.0E+00                     |
| 2        | <sup>5</sup> D <sub>1</sub> → <sup>7</sup> F <sub>0</sub> | S <sub>0</sub> →S <sub>1</sub> | 0.0        | -15473                       | 4.1E-31                  | 0.0E+00                      | 0.0E+00                      | 4.1E-31                     |
| 3        | <sup>5</sup> D <sub>2</sub> → <sup>7</sup> F <sub>0</sub> | S <sub>0</sub> →S <sub>1</sub> | 0.0        | -13017                       | 0.0E+00                  | 0.0E+00                      | 0.0E+00                      | 0.0E+00                     |
| 4        | <sup>5</sup> L <sub>6</sub> → <sup>7</sup> F <sub>0</sub> | S <sub>0</sub> →S <sub>1</sub> | 0.0        | -9175                        | 9.4E-18                  | 9.4E-18                      | 2.8E-21                      | 0.0E+00                     |
| 5        | <sup>5</sup> G <sub>6</sub> → <sup>7</sup> F <sub>0</sub> | S <sub>0</sub> →S <sub>1</sub> | 2.2        | -7748                        | 6.3E-15                  | 6.3E-15                      | 1.9E-18                      | 0.0E+00                     |
| 6        | <sup>5</sup> D <sub>4</sub> → <sup>7</sup> F <sub>0</sub> | S <sub>0</sub> →S <sub>1</sub> | 63.3       | -6914                        | 1.8E-13                  | 1.3E-13                      | 5.6E-14                      | 0.0E+00                     |
| 7        | <sup>5</sup> D <sub>0</sub> → <sup>7</sup> F <sub>1</sub> | S <sub>0</sub> →S <sub>1</sub> | 0.0        | -17579                       | 9.9E-36                  | 0.0E+00                      | 0.0E+00                      | 9.9E-36                     |
| 8        | <sup>5</sup> D <sub>1</sub> → <sup>7</sup> F <sub>1</sub> | S <sub>0</sub> →S <sub>1</sub> | 0.0        | -15845                       | 2.8E-32                  | 2.0E-36                      | 2.8E-32                      | 4.2E-35                     |
| 9        | <sup>5</sup> D <sub>2</sub> → <sup>7</sup> F <sub>1</sub> | S <sub>0</sub> →S <sub>1</sub> | 0.0        | -13389                       | 1.3E-26                  | 0.0E+00                      | 0.0E+00                      | 1.3E-26                     |
| 10       | <sup>5</sup> D <sub>3</sub> → <sup>7</sup> F <sub>1</sub> | S <sub>0</sub> →S <sub>1</sub> | 0.0        | -10517                       | 1.2E-19                  | 3.4E-22                      | 1.2E-19                      | 0.0E+00                     |
| 11       | <sup>5</sup> L <sub>6</sub> → <sup>7</sup> F <sub>1</sub> | S <sub>0</sub> →S <sub>1</sub> | 0.0        | -9547                        | 6.8E-19                  | 6.8E-19                      | 2.1E-22                      | 0.0E+00                     |
| 12       | <sup>5</sup> L <sub>7</sub> → <sup>7</sup> F <sub>1</sub> | S <sub>0</sub> →S <sub>1</sub> | 0.1        | -8515                        | 3.8E-16                  | 3.8E-16                      | 1.2E-19                      | 0.0E+00                     |
| 13       | <sup>5</sup> G <sub>2</sub> → <sup>7</sup> F <sub>1</sub> | S <sub>0</sub> →S <sub>1</sub> | 25.4       | -8480                        | 7.4E-14                  | 0.0E+00                      | 0.0E+00                      | 7.4E-14                     |
| 14       | <sup>5</sup> G <sub>3</sub> → <sup>7</sup> F <sub>1</sub> | S <sub>0</sub> →S <sub>1</sub> | 7.6        | -8250                        | 2.2E-14                  | 1.2E-16                      | 2.2E-14                      | 0.0E+00                     |
| 15       | <sup>5</sup> G <sub>6</sub> → <sup>7</sup> F <sub>1</sub> | S <sub>0</sub> →S <sub>1</sub> | 0.4        | -8120                        | 1.1E-15                  | 1.1E-15                      | 3.2E-19                      | 0.0E+00                     |
| 16       | <sup>5</sup> G <sub>5</sub> → <sup>7</sup> F <sub>1</sub> | S <sub>0</sub> →S <sub>1</sub> | 0.9        | -8109                        | 2.7E-15                  | 2.7E-15                      | 2.5E-17                      | 0.0E+00                     |
|          |                                                           |                                |            | $W_b^S$                      | 3×10 <sup>-13</sup>      |                              |                              |                             |
| 17       | <sup>5</sup> D <sub>0</sub> → <sup>7</sup> F <sub>0</sub> | S <sub>0</sub> →T <sub>1</sub> | 0.0        | -5497                        | 9.6E-12                  | 6.8E-16                      | 9.6E-12                      | 0.0E+00                     |
| 18       | <sup>5</sup> D <sub>1</sub> → <sup>7</sup> F <sub>0</sub> | S <sub>0</sub> →T <sub>1</sub> | 0.0        | -3763                        | 7.8E-03                  | 0.0E+00                      | 0.0E+00                      | 7.8E-03                     |
| 19       | <sup>5</sup> D <sub>2</sub> → <sup>7</sup> F <sub>0</sub> | S <sub>0</sub> →T <sub>1</sub> | 0.0        | -1307                        | 0.0E+00                  | 0.0E+00                      | 0.0E+00                      | 0.0E+00                     |
| 20       | <sup>5</sup> L <sub>6</sub> → <sup>7</sup> F <sub>0</sub> | S <sub>0</sub> →T <sub>1</sub> | 0.0        | 2535                         | 1.3E-01                  | 1.3E-01                      | 3.8E-05                      | 0.0E+00                     |
| 21       | <sup>5</sup> G <sub>6</sub> → <sup>7</sup> F <sub>0</sub> | S <sub>0</sub> →T <sub>1</sub> | 0.0        | 3962                         | 2.5E-02                  | 2.5E-02                      | 7.1E-06                      | 0.0E+00                     |
| 22       | <sup>5</sup> D <sub>4</sub> → <sup>7</sup> F <sub>0</sub> | S <sub>0</sub> →T <sub>1</sub> | 0.0        | 4796                         | 6.1E-03                  | 4.3E-03                      | 1.8E-03                      | 0.0E+00                     |
| 23       | <sup>5</sup> D <sub>0</sub> → <sup>7</sup> F <sub>1</sub> | S <sub>0</sub> →T <sub>1</sub> | 0.0        | -5869                        | 2.2E-06                  | 0.0E+00                      | 0.0E+00                      | 2.2E-06                     |
| 24       | <sup>5</sup> D <sub>1</sub> → <sup>7</sup> F <sub>1</sub> | S <sub>0</sub> →T <sub>1</sub> | 0.0        | -4135                        | 1.3E-06                  | 5.8E-12                      | 8.2E-08                      | 1.2E-06                     |
| 25       | <sup>5</sup> D <sub>2</sub> → <sup>7</sup> F <sub>1</sub> | S <sub>0</sub> →T <sub>1</sub> | 0.0        | -1679                        | 2.5E+01                  | 0.0E+00                      | 0.0E+00                      | 2.5E+01                     |
| 26       | <sup>5</sup> D <sub>3</sub> → <sup>7</sup> F <sub>1</sub> | S <sub>0</sub> →T <sub>1</sub> | 0.0        | 1193                         | 4.0E+00                  | 1.1E-02                      | 4.0E+00                      | 0.0E+00                     |
| 27       | <sup>5</sup> L <sub>6</sub> → <sup>7</sup> F <sub>1</sub> | S <sub>0</sub> →T <sub>1</sub> | 0.0        | 2163                         | 8.2E-02                  | 8.2E-02                      | 2.4E-05                      | 0.0E+00                     |
| 28       | <sup>5</sup> L <sub>7</sub> → <sup>7</sup> F <sub>1</sub> | S <sub>0</sub> →T <sub>1</sub> | 0.0        | 3195                         | 1.2E-01                  | 1.2E-01                      | 3.5E-05                      | 0.0E+00                     |
| 29       | <sup>5</sup> G <sub>2</sub> → <sup>7</sup> F <sub>1</sub> | S <sub>0</sub> →T <sub>1</sub> | 100.0      | 3230                         | 1.9E+05                  | 0.0E+00                      | 0.0E+00                      | 1.9E+05                     |
| 30       | <sup>5</sup> G <sub>3</sub> → <sup>7</sup> F <sub>1</sub> | S <sub>0</sub> →T <sub>1</sub> | 0.0        | 3460                         | 1.5E+00                  | 8.3E-03                      | 1.5E+00                      | 0.0E+00                     |
| 31       | <sup>5</sup> G <sub>6</sub> → <sup>7</sup> F <sub>1</sub> | S <sub>0</sub> →T <sub>1</sub> | 0.0        | 3590                         | 3.5E-02                  | 3.5E-02                      | 1.0E-05                      | 0.0E+00                     |
| 32       | <sup>5</sup> G <sub>5</sub> → <sup>7</sup> F <sub>1</sub> | S <sub>0</sub> →T <sub>1</sub> | 0.0        | 3601                         | 8.5E-02                  | 8.4E-02                      | 7.4E-04                      | 0.0E+00                     |
|          |                                                           |                                |            | $W_b^T$                      | 1.7×10 <sup>5</sup>      |                              |                              |                             |

**Table S13.** Forward (ligand-to-Tb) IET rates for **NMe<sub>4</sub>[TbL<sub>4</sub>]**.

| <i>p</i> | donor                          | acceptor                                                   | contr. (%) | $\Delta$ (cm <sup>-1</sup> ) | $W$ (s <sup>-1</sup> ) | $W_{d-d}$ (s <sup>-1</sup> ) | $W_{d-m}$ (s <sup>-1</sup> ) | $W_{ex}$ (s <sup>-1</sup> ) |
|----------|--------------------------------|------------------------------------------------------------|------------|------------------------------|------------------------|------------------------------|------------------------------|-----------------------------|
| 1        | S <sub>1</sub> →S <sub>0</sub> | <sup>7</sup> F <sub>6</sub> → <sup>5</sup> D <sub>4</sub>  | 0.0        | 17556                        | 3.9E+01                | 4.7E-02                      | 3.9E+01                      | 0.0E+00                     |
| 2        | S <sub>1</sub> →S <sub>0</sub> | <sup>7</sup> F <sub>6</sub> → <sup>5</sup> D <sub>3</sub>  | 0.0        | 11764                        | 1.1E+02                | 6.2E+01                      | 4.5E+01                      | 0.0E+00                     |
| 3        | S <sub>1</sub> →S <sub>0</sub> | <sup>7</sup> F <sub>6</sub> → <sup>5</sup> G <sub>6</sub>  | 0.2        | 11577                        | 4.5E+07                | 5.9E+03                      | 1.3E+05                      | 4.5E+07                     |
| 4        | S <sub>1</sub> →S <sub>0</sub> | <sup>7</sup> F <sub>6</sub> → <sup>5</sup> L <sub>10</sub> | 0.0        | 11029                        | 5.4E+03                | 5.0E+03                      | 4.6E+02                      | 0.0E+00                     |
| 5        | S <sub>1</sub> →S <sub>0</sub> | <sup>7</sup> F <sub>6</sub> → <sup>5</sup> G <sub>5</sub>  | 0.1        | 10233                        | 1.1E+07                | 2.5E+03                      | 3.5E+05                      | 1.1E+07                     |
| 6        | S <sub>1</sub> →S <sub>0</sub> | <sup>7</sup> F <sub>6</sub> → <sup>5</sup> G <sub>4</sub>  | 0.0        | 9713                         | 4.8E+04                | 2.5E+03                      | 4.6E+04                      | 0.0E+00                     |
| 7        | S <sub>1</sub> →S <sub>0</sub> | <sup>7</sup> F <sub>6</sub> → <sup>5</sup> L <sub>9</sub>  | 0.0        | 9592                         | 1.8E+04                | 1.4E+04                      | 3.8E+03                      | 0.0E+00                     |
| 8        | S <sub>1</sub> →S <sub>0</sub> | <sup>7</sup> F <sub>6</sub> → <sup>5</sup> G <sub>3</sub>  | 0.0        | 9023                         | 1.3E+03                | 7.3E+02                      | 5.3E+02                      | 0.0E+00                     |
| 9        | S <sub>1</sub> →S <sub>0</sub> | <sup>7</sup> F <sub>6</sub> → <sup>5</sup> L <sub>8</sub>  | 0.0        | 8810                         | 1.4E+04                | 1.3E+04                      | 1.2E+03                      | 0.0E+00                     |
| 10       | S <sub>1</sub> →S <sub>0</sub> | <sup>7</sup> F <sub>6</sub> → <sup>5</sup> L <sub>7</sub>  | 0.0        | 8543                         | 7.0E+05                | 8.5E+03                      | 6.9E+05                      | 4.4E+02                     |
| 11       | S <sub>1</sub> →S <sub>0</sub> | <sup>7</sup> F <sub>6</sub> → <sup>5</sup> L <sub>6</sub>  | 0.1        | 8330                         | 1.2E+07                | 0.0E+00                      | 0.0E+00                      | 1.2E+07                     |
| 12       | S <sub>1</sub> →S <sub>0</sub> | <sup>7</sup> F <sub>6</sub> → <sup>5</sup> H <sub>7</sub>  | 0.2        | 6621                         | 4.0E+07                | 0.0E+00                      | 0.0E+00                      | 4.0E+07                     |
| 13       | S <sub>1</sub> →S <sub>0</sub> | <sup>7</sup> F <sub>6</sub> → <sup>5</sup> H <sub>6</sub>  | 3.7        | 5109                         | 6.9E+08                | 0.0E+00                      | 0.0E+00                      | 6.9E+08                     |
| 14       | S <sub>1</sub> →S <sub>0</sub> | <sup>7</sup> F <sub>6</sub> → <sup>5</sup> H <sub>5</sub>  | 0.0        | 4233                         | 1.1E+01                | 0.0E+00                      | 0.0E+00                      | 1.1E+01                     |
| 15       | S <sub>1</sub> →S <sub>0</sub> | <sup>7</sup> F <sub>6</sub> → <sup>5</sup> F <sub>5</sub>  | 15.8       | 3066                         | 2.9E+09                | 0.0E+00                      | 0.0E+00                      | 2.9E+09                     |
| 16       | S <sub>1</sub> →S <sub>0</sub> | <sup>7</sup> F <sub>6</sub> → <sup>5</sup> I <sub>7</sub>  | 1.0        | 1411                         | 1.8E+08                | 0.0E+00                      | 0.0E+00                      | 1.8E+08                     |
| 17       | S <sub>1</sub> →S <sub>0</sub> | <sup>7</sup> F <sub>6</sub> → <sup>5</sup> I <sub>6</sub>  | 15.1       | 402                          | 2.8E+09                | 0.0E+00                      | 0.0E+00                      | 2.8E+09                     |
| 18       | S <sub>1</sub> →S <sub>0</sub> | <sup>7</sup> F <sub>6</sub> → <sup>5</sup> I <sub>5</sub>  | 1.3        | 14                           | 2.4E+08                | 0.0E+00                      | 0.0E+00                      | 2.4E+08                     |
| 19       | S <sub>1</sub> →S <sub>0</sub> | <sup>7</sup> F <sub>6</sub> → <sup>5</sup> K <sub>5</sub>  | 0.0        | -3334                        | 7.8E-01                | 0.0E+00                      | 0.0E+00                      | 7.8E-01                     |
| 20       | S <sub>1</sub> →S <sub>0</sub> | <sup>7</sup> F <sub>6</sub> → <sup>5</sup> K <sub>7</sub>  | 0.0        | -3693                        | 1.5E-08                | 0.0E+00                      | 0.0E+00                      | 1.5E-08                     |
| 21       | S <sub>1</sub> →S <sub>0</sub> | <sup>7</sup> F <sub>5</sub> → <sup>5</sup> D <sub>4</sub>  | 0.0        | 19604                        | 1.2E+02                | 4.6E-03                      | 2.7E+01                      | 9.5E+01                     |
| 22       | S <sub>1</sub> →S <sub>0</sub> | <sup>7</sup> F <sub>5</sub> → <sup>5</sup> D <sub>3</sub>  | 0.0        | 13812                        | 4.2E+03                | 1.6E+01                      | 4.2E+03                      | 0.0E+00                     |
| 23       | S <sub>1</sub> →S <sub>0</sub> | <sup>7</sup> F <sub>5</sub> → <sup>5</sup> G <sub>6</sub>  | 0.0        | 13625                        | 7.8E+05                | 7.0E+01                      | 4.1E+04                      | 7.4E+05                     |
| 24       | S <sub>1</sub> →S <sub>0</sub> | <sup>7</sup> F <sub>5</sub> → <sup>5</sup> L <sub>10</sub> | 0.0        | 13077                        | 1.9E+01                | 1.8E+01                      | 1.2E+00                      | 0.0E+00                     |
| 25       | S <sub>1</sub> →S <sub>0</sub> | <sup>7</sup> F <sub>5</sub> → <sup>5</sup> G <sub>5</sub>  | 0.1        | 12281                        | 1.1E+07                | 1.9E+02                      | 4.7E+03                      | 1.1E+07                     |
| 26       | S <sub>1</sub> →S <sub>0</sub> | <sup>7</sup> F <sub>5</sub> → <sup>5</sup> D <sub>2</sub>  | 0.0        | 11941                        | 6.3E+02                | 8.4E+01                      | 5.5E+02                      | 0.0E+00                     |
| 27       | S <sub>1</sub> →S <sub>0</sub> | <sup>7</sup> F <sub>5</sub> → <sup>5</sup> G <sub>4</sub>  | 0.0        | 11761                        | 2.5E+06                | 1.0E+02                      | 4.0E+04                      | 2.4E+06                     |
| 28       | S <sub>1</sub> →S <sub>0</sub> | <sup>7</sup> F <sub>5</sub> → <sup>5</sup> L <sub>9</sub>  | 0.0        | 11640                        | 1.0E+03                | 7.7E+02                      | 2.4E+02                      | 0.0E+00                     |
| 29       | S <sub>1</sub> →S <sub>0</sub> | <sup>7</sup> F <sub>5</sub> → <sup>5</sup> L <sub>8</sub>  | 0.0        | 10858                        | 3.9E+03                | 2.6E+03                      | 1.3E+03                      | 0.0E+00                     |
| 30       | S <sub>1</sub> →S <sub>0</sub> | <sup>7</sup> F <sub>5</sub> → <sup>5</sup> L <sub>7</sub>  | 0.0        | 10591                        | 5.1E+04                | 1.0E+03                      | 5.0E+04                      | 0.0E+00                     |
| 31       | S <sub>1</sub> →S <sub>0</sub> | <sup>7</sup> F <sub>5</sub> → <sup>5</sup> I <sub>6</sub>  | 0.0        | 10378                        | 3.6E+05                | 0.0E+00                      | 0.0E+00                      | 3.6E+05                     |
| 32       | S <sub>1</sub> →S <sub>0</sub> | <sup>7</sup> F <sub>5</sub> → <sup>5</sup> H <sub>6</sub>  | 0.2        | 7157                         | 3.6E+07                | 0.0E+00                      | 0.0E+00                      | 3.6E+07                     |
| 33       | S <sub>1</sub> →S <sub>0</sub> | <sup>7</sup> F <sub>5</sub> → <sup>5</sup> H <sub>5</sub>  | 4.0        | 6281                         | 7.4E+08                | 0.0E+00                      | 0.0E+00                      | 7.4E+08                     |
| 34       | S <sub>1</sub> →S <sub>0</sub> | <sup>7</sup> F <sub>5</sub> → <sup>5</sup> H <sub>4</sub>  | 12.3       | 5709                         | 2.3E+09                | 0.0E+00                      | 0.0E+00                      | 2.3E+09                     |
| 35       | S <sub>1</sub> →S <sub>0</sub> | <sup>7</sup> F <sub>5</sub> → <sup>5</sup> F <sub>5</sub>  | 9.4        | 5114                         | 1.7E+09                | 0.0E+00                      | 0.0E+00                      | 1.7E+09                     |
| 36       | S <sub>1</sub> →S <sub>0</sub> | <sup>7</sup> F <sub>5</sub> → <sup>5</sup> F <sub>4</sub>  | 34.3       | 4674                         | 6.4E+09                | 0.0E+00                      | 0.0E+00                      | 6.4E+09                     |
| 37       | S <sub>1</sub> →S <sub>0</sub> | <sup>7</sup> F <sub>5</sub> → <sup>5</sup> I <sub>6</sub>  | 2.1        | 2450                         | 3.9E+08                | 0.0E+00                      | 0.0E+00                      | 3.9E+08                     |
| 38       | S <sub>1</sub> →S <sub>0</sub> | <sup>7</sup> F <sub>5</sub> → <sup>5</sup> I <sub>4</sub>  | 0.0        | 2440                         | 3.9E+05                | 0.0E+00                      | 0.0E+00                      | 3.9E+05                     |
| 39       | S <sub>1</sub> →S <sub>0</sub> | <sup>7</sup> F <sub>5</sub> → <sup>5</sup> I <sub>5</sub>  | 0.2        | 2062                         | 2.9E+07                | 0.0E+00                      | 0.0E+00                      | 2.9E+07                     |
| 40       | S <sub>1</sub> →S <sub>0</sub> | <sup>7</sup> F <sub>5</sub> → <sup>5</sup> K <sub>5</sub>  | 0.0        | -1286                        | 1.8E+04                | 0.0E+00                      | 0.0E+00                      | 1.8E+04                     |
|          |                                |                                                            |            | $W^S$                        | 1.8×10 <sup>10</sup>   |                              |                              |                             |
| 41       | T <sub>1</sub> →S <sub>0</sub> | <sup>7</sup> F <sub>6</sub> → <sup>5</sup> D <sub>4</sub>  | 0.0        | 2145                         | 5.6E+02                | 6.9E-01                      | 5.6E+02                      | 0.0E+00                     |

|    |                       |                                  |       |        |                   |         |         |         |
|----|-----------------------|----------------------------------|-------|--------|-------------------|---------|---------|---------|
| 42 | $T_1 \rightarrow S_0$ | ${}^7F_6 \rightarrow {}^5D_3$    | 0.0   | -3647  | 1.8E-08           | 1.0E-08 | 7.3E-09 | 0.0E+00 |
| 43 | $T_1 \rightarrow S_0$ | ${}^7F_6 \rightarrow {}^5G_6$    | 0.0   | -3834  | 2.4E+01           | 3.2E-07 | 7.0E-06 | 2.4E+01 |
| 44 | $T_1 \rightarrow S_0$ | ${}^7F_6 \rightarrow {}^5L_{10}$ | 0.0   | -4382  | 1.1E-08           | 9.7E-09 | 8.7E-10 | 0.0E+00 |
| 45 | $T_1 \rightarrow S_0$ | ${}^7F_6 \rightarrow {}^5G_5$    | 0.0   | -5178  | 1.8E-03           | 4.1E-11 | 5.7E-09 | 1.8E-03 |
| 46 | $T_1 \rightarrow S_0$ | ${}^7F_6 \rightarrow {}^5G_4$    | 0.0   | -5698  | 3.5E-11           | 1.8E-12 | 3.3E-11 | 0.0E+00 |
| 47 | $T_1 \rightarrow S_0$ | ${}^7F_6 \rightarrow {}^5L_9$    | 0.0   | -5819  | 6.4E-12           | 5.1E-12 | 1.3E-12 | 0.0E+00 |
| 48 | $T_1 \rightarrow S_0$ | ${}^7F_6 \rightarrow {}^5G_3$    | 0.0   | -6388  | 1.5E-14           | 8.7E-15 | 6.2E-15 | 0.0E+00 |
| 49 | $T_1 \rightarrow S_0$ | ${}^7F_6 \rightarrow {}^5L_8$    | 0.0   | -6601  | 4.7E-14           | 4.4E-14 | 3.8E-15 | 0.0E+00 |
| 50 | $T_1 \rightarrow S_0$ | ${}^7F_6 \rightarrow {}^5L_7$    | 0.0   | -6868  | 3.4E-12           | 5.8E-15 | 4.7E-13 | 3.0E-12 |
| 51 | $T_1 \rightarrow S_0$ | ${}^7F_6 \rightarrow {}^5L_6$    | 0.0   | -7081  | 2.2E-08           | 0.0E+00 | 0.0E+00 | 2.2E-08 |
| 52 | $T_1 \rightarrow S_0$ | ${}^7F_6 \rightarrow {}^5H_7$    | 0.0   | -8790  | 3.1E-12           | 0.0E+00 | 0.0E+00 | 3.1E-12 |
| 53 | $T_1 \rightarrow S_0$ | ${}^7F_6 \rightarrow {}^5H_6$    | 0.0   | -10302 | 7.7E-15           | 0.0E+00 | 0.0E+00 | 7.7E-15 |
| 54 | $T_1 \rightarrow S_0$ | ${}^7F_6 \rightarrow {}^5H_5$    | 0.0   | -11178 | 7.4E-25           | 0.0E+00 | 0.0E+00 | 7.4E-25 |
| 55 | $T_1 \rightarrow S_0$ | ${}^7F_6 \rightarrow {}^5F_5$    | 0.0   | -12345 | 2.3E-19           | 0.0E+00 | 0.0E+00 | 2.3E-19 |
| 56 | $T_1 \rightarrow S_0$ | ${}^7F_6 \rightarrow {}^5I_7$    | 0.0   | -14000 | 1.0E-24           | 0.0E+00 | 0.0E+00 | 1.0E-24 |
| 57 | $T_1 \rightarrow S_0$ | ${}^7F_6 \rightarrow {}^5I_6$    | 0.0   | -15009 | 5.2E-26           | 0.0E+00 | 0.0E+00 | 5.2E-26 |
| 58 | $T_1 \rightarrow S_0$ | ${}^7F_6 \rightarrow {}^5I_5$    | 0.0   | -15397 | 4.9E-28           | 0.0E+00 | 0.0E+00 | 4.9E-28 |
| 59 | $T_1 \rightarrow S_0$ | ${}^7F_6 \rightarrow {}^5K_5$    | 0.0   | -18745 | 1.0E-37           | 0.0E+00 | 0.0E+00 | 1.0E-37 |
| 60 | $T_1 \rightarrow S_0$ | ${}^7F_6 \rightarrow {}^5K_7$    | 0.0   | -19104 | 1.5E-45           | 0.0E+00 | 0.0E+00 | 1.5E-45 |
| 61 | $T_1 \rightarrow S_0$ | ${}^7F_5 \rightarrow {}^5D_4$    | 100.0 | 4193   | 2.6E+08           | 1.3E+00 | 7.3E+03 | 2.6E+08 |
| 62 | $T_1 \rightarrow S_0$ | ${}^7F_5 \rightarrow {}^5D_3$    | 0.0   | -1599  | 1.8E-01           | 6.7E-04 | 1.8E-01 | 0.0E+00 |
| 63 | $T_1 \rightarrow S_0$ | ${}^7F_5 \rightarrow {}^5G_6$    | 0.0   | -1786  | 9.8E+04           | 9.4E-04 | 5.5E-01 | 9.8E+04 |
| 64 | $T_1 \rightarrow S_0$ | ${}^7F_5 \rightarrow {}^5L_{10}$ | 0.0   | -2334  | 9.0E-06           | 8.5E-06 | 5.5E-07 | 0.0E+00 |
| 65 | $T_1 \rightarrow S_0$ | ${}^7F_5 \rightarrow {}^5G_5$    | 0.0   | -3130  | 4.2E+02           | 7.1E-07 | 1.8E-05 | 4.2E+02 |
| 66 | $T_1 \rightarrow S_0$ | ${}^7F_5 \rightarrow {}^5D_2$    | 0.0   | -3470  | 3.0E-07           | 4.1E-08 | 2.6E-07 | 0.0E+00 |
| 67 | $T_1 \rightarrow S_0$ | ${}^7F_5 \rightarrow {}^5G_4$    | 0.0   | -3650  | 3.9E+00           | 1.7E-08 | 6.4E-06 | 3.9E+00 |
| 68 | $T_1 \rightarrow S_0$ | ${}^7F_5 \rightarrow {}^5L_9$    | 0.0   | -3771  | 7.9E-08           | 6.0E-08 | 1.9E-08 | 0.0E+00 |
| 69 | $T_1 \rightarrow S_0$ | ${}^7F_5 \rightarrow {}^5L_8$    | 0.0   | -4553  | 2.7E-09           | 1.8E-09 | 8.9E-10 | 0.0E+00 |
| 70 | $T_1 \rightarrow S_0$ | ${}^7F_5 \rightarrow {}^5L_7$    | 0.0   | -4820  | 7.1E-09           | 1.4E-10 | 7.0E-09 | 0.0E+00 |
| 71 | $T_1 \rightarrow S_0$ | ${}^7F_5 \rightarrow {}^5I_6$    | 0.0   | -5033  | 1.4E-04           | 0.0E+00 | 0.0E+00 | 1.4E-04 |
| 72 | $T_1 \rightarrow S_0$ | ${}^7F_5 \rightarrow {}^5H_6$    | 0.0   | -8254  | 6.5E-11           | 0.0E+00 | 0.0E+00 | 6.5E-11 |
| 73 | $T_1 \rightarrow S_0$ | ${}^7F_5 \rightarrow {}^5H_5$    | 0.0   | -9130  | 7.8E-12           | 0.0E+00 | 0.0E+00 | 7.8E-12 |
| 74 | $T_1 \rightarrow S_0$ | ${}^7F_5 \rightarrow {}^5H_4$    | 0.0   | -9702  | 8.4E-13           | 0.0E+00 | 0.0E+00 | 8.4E-13 |
| 75 | $T_1 \rightarrow S_0$ | ${}^7F_5 \rightarrow {}^5F_5$    | 0.0   | -10297 | 2.0E-14           | 0.0E+00 | 0.0E+00 | 2.0E-14 |
| 76 | $T_1 \rightarrow S_0$ | ${}^7F_5 \rightarrow {}^5F_4$    | 0.0   | -10737 | 5.6E-15           | 0.0E+00 | 0.0E+00 | 5.6E-15 |
| 77 | $T_1 \rightarrow S_0$ | ${}^7F_5 \rightarrow {}^5I_6$    | 0.0   | -12961 | 8.7E-22           | 0.0E+00 | 0.0E+00 | 8.7E-22 |
| 78 | $T_1 \rightarrow S_0$ | ${}^7F_5 \rightarrow {}^5I_4$    | 0.0   | -12971 | 8.3E-25           | 0.0E+00 | 0.0E+00 | 8.3E-25 |
| 79 | $T_1 \rightarrow S_0$ | ${}^7F_5 \rightarrow {}^5I_5$    | 0.0   | -13349 | 7.0E-24           | 0.0E+00 | 0.0E+00 | 7.0E-24 |
| 80 | $T_1 \rightarrow S_0$ | ${}^7F_5 \rightarrow {}^5K_5$    | 0.0   | -16697 | 1.2E-32           | 0.0E+00 | 0.0E+00 | 1.2E-32 |
|    |                       |                                  |       | $W^T$  | $2.6 \times 10^8$ |         |         |         |

**Table S14.** Backward (Tb-to-ligand) IET rates for  $\text{NMe}_4[\text{TbL}_4]$

| $p$ | donor                                                      | acceptor                       | contr. (%) | $\Delta$ (cm <sup>-1</sup> ) | $W_b$ (s <sup>-1</sup> ) | $W_{d-d}$ (s <sup>-1</sup> ) | $W_{d-m}$ (s <sup>-1</sup> ) | $W_{ex}$ (s <sup>-1</sup> ) |
|-----|------------------------------------------------------------|--------------------------------|------------|------------------------------|--------------------------|------------------------------|------------------------------|-----------------------------|
| 1   | <sup>5</sup> D <sub>4</sub> → <sup>7</sup> F <sub>6</sub>  | S <sub>0</sub> →S <sub>1</sub> | 0.0        | -17556                       | 9.0E-36                  | 1.1E-38                      | 9.0E-36                      | 0.0E+00                     |
| 2   | <sup>5</sup> D <sub>3</sub> → <sup>7</sup> F <sub>6</sub>  | S <sub>0</sub> →S <sub>1</sub> | 0.0        | -11764                       | 4.4E-23                  | 2.6E-23                      | 1.8E-23                      | 0.0E+00                     |
| 3   | <sup>5</sup> G <sub>6</sub> → <sup>7</sup> F <sub>6</sub>  | S <sub>0</sub> →S <sub>1</sub> | 0.0        | -11577                       | 2.4E-17                  | 3.2E-21                      | 7.2E-20                      | 2.4E-17                     |
| 4   | <sup>5</sup> L <sub>10</sub> → <sup>7</sup> F <sub>6</sub> | S <sub>0</sub> →S <sub>1</sub> | 0.0        | -11029                       | 2.6E-20                  | 2.4E-20                      | 2.2E-21                      | 0.0E+00                     |
| 5   | <sup>5</sup> G <sub>5</sub> → <sup>7</sup> F <sub>6</sub>  | S <sub>0</sub> →S <sub>1</sub> | 0.0        | -10233                       | 4.8E-15                  | 1.1E-18                      | 1.5E-16                      | 4.6E-15                     |
| 6   | <sup>5</sup> G <sub>4</sub> → <sup>7</sup> F <sub>6</sub>  | S <sub>0</sub> →S <sub>1</sub> | 0.0        | -9713                        | 3.1E-16                  | 1.6E-17                      | 2.9E-16                      | 0.0E+00                     |
| 7   | <sup>5</sup> L <sub>9</sub> → <sup>7</sup> F <sub>6</sub>  | S <sub>0</sub> →S <sub>1</sub> | 0.0        | -9592                        | 9.8E-17                  | 7.7E-17                      | 2.1E-17                      | 0.0E+00                     |
| 8   | <sup>5</sup> G <sub>3</sub> → <sup>7</sup> F <sub>6</sub>  | S <sub>0</sub> →S <sub>1</sub> | 0.0        | -9023                        | 2.9E-16                  | 1.7E-16                      | 1.2E-16                      | 0.0E+00                     |
| 9   | <sup>5</sup> L <sub>8</sub> → <sup>7</sup> F <sub>6</sub>  | S <sub>0</sub> →S <sub>1</sub> | 0.0        | -8810                        | 3.8E-15                  | 3.4E-15                      | 3.0E-16                      | 0.0E+00                     |
| 10  | <sup>5</sup> L <sub>7</sub> → <sup>7</sup> F <sub>6</sub>  | S <sub>0</sub> →S <sub>1</sub> | 0.0        | -8543                        | 7.5E-13                  | 9.3E-15                      | 7.4E-13                      | 4.8E-16                     |
| 11  | <sup>5</sup> L <sub>6</sub> → <sup>7</sup> F <sub>6</sub>  | S <sub>0</sub> →S <sub>1</sub> | 0.0        | -8330                        | 4.1E-11                  | 0.0E+00                      | 0.0E+00                      | 4.1E-11                     |
| 12  | <sup>5</sup> H <sub>7</sub> → <sup>7</sup> F <sub>6</sub>  | S <sub>0</sub> →S <sub>1</sub> | 0.0        | -6621                        | 4.6E-07                  | 0.0E+00                      | 0.0E+00                      | 4.6E-07                     |
| 13  | <sup>5</sup> H <sub>6</sub> → <sup>7</sup> F <sub>6</sub>  | S <sub>0</sub> →S <sub>1</sub> | 0.0        | -5109                        | 1.4E-02                  | 0.0E+00                      | 0.0E+00                      | 1.4E-02                     |
| 14  | <sup>5</sup> H <sub>5</sub> → <sup>7</sup> F <sub>6</sub>  | S <sub>0</sub> →S <sub>1</sub> | 0.0        | -4233                        | 1.7E-08                  | 0.0E+00                      | 0.0E+00                      | 1.7E-08                     |
| 15  | <sup>5</sup> F <sub>5</sub> → <sup>7</sup> F <sub>6</sub>  | S <sub>0</sub> →S <sub>1</sub> | 0.0        | -3066                        | 1.3E+03                  | 0.0E+00                      | 0.0E+00                      | 1.3E+03                     |
| 16  | <sup>5</sup> I <sub>7</sub> → <sup>7</sup> F <sub>6</sub>  | S <sub>0</sub> →S <sub>1</sub> | 0.0        | -1411                        | 1.7E+05                  | 0.0E+00                      | 0.0E+00                      | 1.7E+05                     |
| 17  | <sup>5</sup> I <sub>6</sub> → <sup>7</sup> F <sub>6</sub>  | S <sub>0</sub> →S <sub>1</sub> | 58.9       | -402                         | 4.0E+08                  | 0.0E+00                      | 0.0E+00                      | 4.0E+08                     |
| 18  | <sup>5</sup> I <sub>5</sub> → <sup>7</sup> F <sub>6</sub>  | S <sub>0</sub> →S <sub>1</sub> | 38.4       | -14                          | 2.6E+08                  | 0.0E+00                      | 0.0E+00                      | 2.6E+08                     |
| 19  | <sup>5</sup> K <sub>5</sub> → <sup>7</sup> F <sub>6</sub>  | S <sub>0</sub> →S <sub>1</sub> | 1.3        | 3334                         | 9.0E+06                  | 0.0E+00                      | 0.0E+00                      | 9.0E+06                     |
| 20  | <sup>5</sup> K <sub>7</sub> → <sup>7</sup> F <sub>6</sub>  | S <sub>0</sub> →S <sub>1</sub> | 0.0        | 3693                         | 7.0E-01                  | 0.0E+00                      | 0.0E+00                      | 7.0E-01                     |
| 21  | <sup>5</sup> D <sub>4</sub> → <sup>7</sup> F <sub>5</sub>  | S <sub>0</sub> →S <sub>1</sub> | 0.0        | -19604                       | 1.2E-39                  | 4.6E-44                      | 2.7E-40                      | 9.5E-40                     |
| 22  | <sup>5</sup> D <sub>3</sub> → <sup>7</sup> F <sub>5</sub>  | S <sub>0</sub> →S <sub>1</sub> | 0.0        | -13812                       | 7.5E-26                  | 2.8E-28                      | 7.4E-26                      | 0.0E+00                     |
| 23  | <sup>5</sup> G <sub>6</sub> → <sup>7</sup> F <sub>5</sub>  | S <sub>0</sub> →S <sub>1</sub> | 0.0        | -13625                       | 1.8E-23                  | 1.7E-27                      | 9.7E-25                      | 1.7E-23                     |
| 24  | <sup>5</sup> L <sub>10</sub> → <sup>7</sup> F <sub>5</sub> | S <sub>0</sub> →S <sub>1</sub> | 0.0        | -13077                       | 3.9E-27                  | 3.7E-27                      | 2.4E-28                      | 0.0E+00                     |
| 25  | <sup>5</sup> G <sub>5</sub> → <sup>7</sup> F <sub>5</sub>  | S <sub>0</sub> →S <sub>1</sub> | 0.0        | -12281                       | 2.0E-19                  | 3.4E-24                      | 8.6E-23                      | 2.0E-19                     |
| 26  | <sup>5</sup> D <sub>2</sub> → <sup>7</sup> F <sub>5</sub>  | S <sub>0</sub> →S <sub>1</sub> | 0.0        | -11941                       | 1.3E-22                  | 1.8E-23                      | 1.1E-22                      | 0.0E+00                     |
| 27  | <sup>5</sup> G <sub>4</sub> → <sup>7</sup> F <sub>5</sub>  | S <sub>0</sub> →S <sub>1</sub> | 0.0        | -11761                       | 6.8E-19                  | 2.9E-23                      | 1.1E-20                      | 6.7E-19                     |
| 28  | <sup>5</sup> L <sub>9</sub> → <sup>7</sup> F <sub>5</sub>  | S <sub>0</sub> →S <sub>1</sub> | 0.0        | -11640                       | 2.4E-22                  | 1.8E-22                      | 5.7E-23                      | 0.0E+00                     |
| 29  | <sup>5</sup> L <sub>8</sub> → <sup>7</sup> F <sub>5</sub>  | S <sub>0</sub> →S <sub>1</sub> | 0.0        | -10858                       | 4.4E-20                  | 3.0E-20                      | 1.5E-20                      | 0.0E+00                     |
| 30  | <sup>5</sup> L <sub>7</sub> → <sup>7</sup> F <sub>5</sub>  | S <sub>0</sub> →S <sub>1</sub> | 0.0        | -10591                       | 2.4E-18                  | 4.8E-20                      | 2.3E-18                      | 0.0E+00                     |
| 31  | <sup>5</sup> I <sub>6</sub> → <sup>7</sup> F <sub>5</sub>  | S <sub>0</sub> →S <sub>1</sub> | 0.0        | -10378                       | 5.5E-17                  | 0.0E+00                      | 0.0E+00                      | 5.5E-17                     |
| 32  | <sup>5</sup> H <sub>6</sub> → <sup>7</sup> F <sub>5</sub>  | S <sub>0</sub> →S <sub>1</sub> | 0.0        | -7157                        | 3.0E-08                  | 0.0E+00                      | 0.0E+00                      | 3.0E-08                     |
| 33  | <sup>5</sup> H <sub>5</sub> → <sup>7</sup> F <sub>5</sub>  | S <sub>0</sub> →S <sub>1</sub> | 0.0        | -6281                        | 5.1E-05                  | 0.0E+00                      | 0.0E+00                      | 5.1E-05                     |
| 34  | <sup>5</sup> H <sub>4</sub> → <sup>7</sup> F <sub>5</sub>  | S <sub>0</sub> →S <sub>1</sub> | 0.0        | -5709                        | 3.0E-03                  | 0.0E+00                      | 0.0E+00                      | 3.0E-03                     |
| 35  | <sup>5</sup> F <sub>5</sub> → <sup>7</sup> F <sub>5</sub>  | S <sub>0</sub> →S <sub>1</sub> | 0.0        | -5114                        | 3.4E-02                  | 0.0E+00                      | 0.0E+00                      | 3.4E-02                     |
| 36  | <sup>5</sup> F <sub>4</sub> → <sup>7</sup> F <sub>5</sub>  | S <sub>0</sub> →S <sub>1</sub> | 0.0        | -4674                        | 1.2E+00                  | 0.0E+00                      | 0.0E+00                      | 1.2E+00                     |
| 37  | <sup>5</sup> I <sub>6</sub> → <sup>7</sup> F <sub>5</sub>  | S <sub>0</sub> →S <sub>1</sub> | 0.0        | -2450                        | 2.4E+03                  | 0.0E+00                      | 0.0E+00                      | 2.4E+03                     |
| 38  | <sup>5</sup> I <sub>4</sub> → <sup>7</sup> F <sub>5</sub>  | S <sub>0</sub> →S <sub>1</sub> | 0.0        | -2440                        | 3.7E+00                  | 0.0E+00                      | 0.0E+00                      | 3.7E+00                     |
| 39  | <sup>5</sup> I <sub>5</sub> → <sup>7</sup> F <sub>5</sub>  | S <sub>0</sub> →S <sub>1</sub> | 0.0        | -2062                        | 1.4E+03                  | 0.0E+00                      | 0.0E+00                      | 1.4E+03                     |
| 40  | <sup>5</sup> K <sub>5</sub> → <sup>7</sup> F <sub>5</sub>  | S <sub>0</sub> →S <sub>1</sub> | 1.3        | 1286                         | 9.0E+06                  | 0.0E+00                      | 0.0E+00                      | 9.0E+06                     |
|     |                                                            |                                |            | $W_b^S$                      | 6.8×10 <sup>8</sup>      |                              |                              |                             |
| 41  | <sup>5</sup> D <sub>4</sub> → <sup>7</sup> F <sub>6</sub>  | S <sub>0</sub> →T <sub>1</sub> | 0.0        | -2145                        | 2.6E-02                  | 3.2E-05                      | 2.6E-02                      | 0.0E+00                     |



|    |                                                |                                     |      |         |                   |         |         |         |
|----|------------------------------------------------|-------------------------------------|------|---------|-------------------|---------|---------|---------|
| 42 | ${}^5\text{D}_3 \rightarrow {}^7\text{F}_6$    | $\text{S}_0 \rightarrow \text{T}_1$ | 0.0  | 3647    | 1.4E+00           | 8.4E-01 | 6.0E-01 | 0.0E+00 |
| 43 | ${}^5\text{G}_6 \rightarrow {}^7\text{F}_6$    | $\text{S}_0 \rightarrow \text{T}_1$ | 45.6 | 3834    | 2.6E+09           | 3.4E+01 | 7.6E+02 | 2.6E+09 |
| 44 | ${}^5\text{L}_{10} \rightarrow {}^7\text{F}_6$ | $\text{S}_0 \rightarrow \text{T}_1$ | 0.0  | 4382    | 1.0E+01           | 9.2E+00 | 8.3E-01 | 0.0E+00 |
| 45 | ${}^5\text{G}_5 \rightarrow {}^7\text{F}_6$    | $\text{S}_0 \rightarrow \text{T}_1$ | 2.7  | 5178    | 1.5E+08           | 3.5E+00 | 4.8E+02 | 1.5E+08 |
| 46 | ${}^5\text{G}_4 \rightarrow {}^7\text{F}_6$    | $\text{S}_0 \rightarrow \text{T}_1$ | 0.0  | 5698    | 4.4E+01           | 2.3E+00 | 4.2E+01 | 0.0E+00 |
| 47 | ${}^5\text{L}_9 \rightarrow {}^7\text{F}_6$    | $\text{S}_0 \rightarrow \text{T}_1$ | 0.0  | 5819    | 6.9E+00           | 5.4E+00 | 1.4E+00 | 0.0E+00 |
| 48 | ${}^5\text{G}_3 \rightarrow {}^7\text{F}_6$    | $\text{S}_0 \rightarrow \text{T}_1$ | 0.0  | 6388    | 6.7E-01           | 3.9E-01 | 2.8E-01 | 0.0E+00 |
| 49 | ${}^5\text{L}_8 \rightarrow {}^7\text{F}_6$    | $\text{S}_0 \rightarrow \text{T}_1$ | 0.0  | 6601    | 2.5E+00           | 2.3E+00 | 2.0E-01 | 0.0E+00 |
| 50 | ${}^5\text{L}_7 \rightarrow {}^7\text{F}_6$    | $\text{S}_0 \rightarrow \text{T}_1$ | 0.0  | 6868    | 7.4E+02           | 1.2E+00 | 1.0E+02 | 6.4E+02 |
| 51 | ${}^5\text{L}_6 \rightarrow {}^7\text{F}_6$    | $\text{S}_0 \rightarrow \text{T}_1$ | 0.3  | 7081    | 1.6E+07           | 0.0E+00 | 0.0E+00 | 1.6E+07 |
| 52 | ${}^5\text{H}_7 \rightarrow {}^7\text{F}_6$    | $\text{S}_0 \rightarrow \text{T}_1$ | 0.1  | 8790    | 7.1E+06           | 0.0E+00 | 0.0E+00 | 7.1E+06 |
| 53 | ${}^5\text{H}_6 \rightarrow {}^7\text{F}_6$    | $\text{S}_0 \rightarrow \text{T}_1$ | 0.5  | 10302   | 3.0E+07           | 0.0E+00 | 0.0E+00 | 3.0E+07 |
| 54 | ${}^5\text{H}_5 \rightarrow {}^7\text{F}_6$    | $\text{S}_0 \rightarrow \text{T}_1$ | 0.0  | 11178   | 2.3E-01           | 0.0E+00 | 0.0E+00 | 2.3E-01 |
| 55 | ${}^5\text{F}_5 \rightarrow {}^7\text{F}_6$    | $\text{S}_0 \rightarrow \text{T}_1$ | 0.4  | 12345   | 2.0E+07           | 0.0E+00 | 0.0E+00 | 2.0E+07 |
| 56 | ${}^5\text{I}_7 \rightarrow {}^7\text{F}_6$    | $\text{S}_0 \rightarrow \text{T}_1$ | 0.0  | 14000   | 2.0E+05           | 0.0E+00 | 0.0E+00 | 2.0E+05 |
| 57 | ${}^5\text{I}_6 \rightarrow {}^7\text{F}_6$    | $\text{S}_0 \rightarrow \text{T}_1$ | 0.0  | 15009   | 1.5E+06           | 0.0E+00 | 0.0E+00 | 1.5E+06 |
| 58 | ${}^5\text{I}_5 \rightarrow {}^7\text{F}_6$    | $\text{S}_0 \rightarrow \text{T}_1$ | 0.0  | 15397   | 1.1E+05           | 0.0E+00 | 0.0E+00 | 1.1E+05 |
| 59 | ${}^5\text{K}_5 \rightarrow {}^7\text{F}_6$    | $\text{S}_0 \rightarrow \text{T}_1$ | 0.0  | 18745   | 2.4E+02           | 0.0E+00 | 0.0E+00 | 2.4E+02 |
| 60 | ${}^5\text{K}_7 \rightarrow {}^7\text{F}_6$    | $\text{S}_0 \rightarrow \text{T}_1$ | 0.0  | 19104   | 1.4E-05           | 0.0E+00 | 0.0E+00 | 1.4E-05 |
| 61 | ${}^5\text{D}_4 \rightarrow {}^7\text{F}_5$    | $\text{S}_0 \rightarrow \text{T}_1$ | 0.0  | -4193   | 5.1E-01           | 2.5E-09 | 1.4E-05 | 5.1E-01 |
| 62 | ${}^5\text{D}_3 \rightarrow {}^7\text{F}_5$    | $\text{S}_0 \rightarrow \text{T}_1$ | 0.0  | 1599    | 6.2E+02           | 2.4E+00 | 6.2E+02 | 0.0E+00 |
| 63 | ${}^5\text{G}_6 \rightarrow {}^7\text{F}_5$    | $\text{S}_0 \rightarrow \text{T}_1$ | 8.2  | 1786    | 4.6E+08           | 4.4E+00 | 2.6E+03 | 4.6E+08 |
| 64 | ${}^5\text{L}_{10} \rightarrow {}^7\text{F}_5$ | $\text{S}_0 \rightarrow \text{T}_1$ | 0.0  | 2334    | 3.7E-01           | 3.5E-01 | 2.2E-02 | 0.0E+00 |
| 65 | ${}^5\text{G}_5 \rightarrow {}^7\text{F}_5$    | $\text{S}_0 \rightarrow \text{T}_1$ | 27.0 | 3130    | 1.5E+09           | 2.6E+00 | 6.4E+01 | 1.5E+09 |
| 66 | ${}^5\text{D}_2 \rightarrow {}^7\text{F}_5$    | $\text{S}_0 \rightarrow \text{T}_1$ | 0.0  | 3470    | 1.2E+01           | 1.7E+00 | 1.1E+01 | 0.0E+00 |
| 67 | ${}^5\text{G}_4 \rightarrow {}^7\text{F}_5$    | $\text{S}_0 \rightarrow \text{T}_1$ | 3.8  | 3650    | 2.1E+08           | 9.3E-01 | 3.5E+02 | 2.1E+08 |
| 68 | ${}^5\text{L}_9 \rightarrow {}^7\text{F}_5$    | $\text{S}_0 \rightarrow \text{T}_1$ | 0.0  | 3771    | 3.7E+00           | 2.8E+00 | 8.6E-01 | 0.0E+00 |
| 69 | ${}^5\text{L}_8 \rightarrow {}^7\text{F}_5$    | $\text{S}_0 \rightarrow \text{T}_1$ | 0.0  | 4553    | 6.1E+00           | 4.1E+00 | 2.0E+00 | 0.0E+00 |
| 70 | ${}^5\text{L}_7 \rightarrow {}^7\text{F}_5$    | $\text{S}_0 \rightarrow \text{T}_1$ | 0.0  | 4820    | 6.6E+01           | 1.3E+00 | 6.5E+01 | 0.0E+00 |
| 71 | ${}^5\text{L}_6 \rightarrow {}^7\text{F}_5$    | $\text{S}_0 \rightarrow \text{T}_1$ | 0.1  | 5033    | 4.2E+06           | 0.0E+00 | 0.0E+00 | 4.2E+06 |
| 72 | ${}^5\text{H}_6 \rightarrow {}^7\text{F}_5$    | $\text{S}_0 \rightarrow \text{T}_1$ | 0.2  | 8254    | 1.1E+07           | 0.0E+00 | 0.0E+00 | 1.1E+07 |
| 73 | ${}^5\text{H}_5 \rightarrow {}^7\text{F}_5$    | $\text{S}_0 \rightarrow \text{T}_1$ | 1.9  | 9130    | 1.1E+08           | 0.0E+00 | 0.0E+00 | 1.1E+08 |
| 74 | ${}^5\text{H}_4 \rightarrow {}^7\text{F}_5$    | $\text{S}_0 \rightarrow \text{T}_1$ | 4.0  | 9702    | 2.2E+08           | 0.0E+00 | 0.0E+00 | 2.2E+08 |
| 75 | ${}^5\text{F}_5 \rightarrow {}^7\text{F}_5$    | $\text{S}_0 \rightarrow \text{T}_1$ | 1.4  | 10297   | 7.6E+07           | 0.0E+00 | 0.0E+00 | 7.6E+07 |
| 76 | ${}^5\text{F}_4 \rightarrow {}^7\text{F}_5$    | $\text{S}_0 \rightarrow \text{T}_1$ | 3.9  | 10737   | 2.2E+08           | 0.0E+00 | 0.0E+00 | 2.2E+08 |
| 77 | ${}^5\text{I}_6 \rightarrow {}^7\text{F}_5$    | $\text{S}_0 \rightarrow \text{T}_1$ | 0.0  | 12961   | 1.1E+06           | 0.0E+00 | 0.0E+00 | 1.1E+06 |
| 78 | ${}^5\text{I}_4 \rightarrow {}^7\text{F}_5$    | $\text{S}_0 \rightarrow \text{T}_1$ | 0.0  | 12971   | 1.6E+03           | 0.0E+00 | 0.0E+00 | 1.6E+03 |
| 79 | ${}^5\text{I}_5 \rightarrow {}^7\text{F}_5$    | $\text{S}_0 \rightarrow \text{T}_1$ | 0.0  | 13349   | 6.6E+04           | 0.0E+00 | 0.0E+00 | 6.6E+04 |
| 80 | ${}^5\text{K}_5 \rightarrow {}^7\text{F}_5$    | $\text{S}_0 \rightarrow \text{T}_1$ | 0.0  | 16697   | 1.2E+03           | 0.0E+00 | 0.0E+00 | 1.2E+03 |
|    |                                                |                                     |      | $W_b^T$ | $5.6 \times 10^9$ |         |         |         |

**Table S15.** Forward (ligand-to-Tb) IET rates for  $\text{NEt}_4[\text{TbL}_4]$ .

| <i>p</i> | donor                          | acceptor                                                   | contr. (%) | $\Delta$ (cm <sup>-1</sup> ) | <i>W</i> (s <sup>-1</sup> ) | <i>W</i> <sub><i>d-d</i></sub> (s <sup>-1</sup> ) | <i>W</i> <sub><i>d-m</i></sub> (s <sup>-1</sup> ) | <i>W</i> <sub><i>ex</i></sub> (s <sup>-1</sup> ) |
|----------|--------------------------------|------------------------------------------------------------|------------|------------------------------|-----------------------------|---------------------------------------------------|---------------------------------------------------|--------------------------------------------------|
| 1        | S <sub>1</sub> →S <sub>0</sub> | <sup>7</sup> F <sub>6</sub> → <sup>5</sup> D <sub>4</sub>  | 0.0        | 17556                        | 9.8E+00                     | 2.0E-02                                           | 9.8E+00                                           | 0.0E+00                                          |
| 2        | S <sub>1</sub> →S <sub>0</sub> | <sup>7</sup> F <sub>6</sub> → <sup>5</sup> D <sub>3</sub>  | 0.0        | 11764                        | 3.3E+01                     | 2.7E+01                                           | 5.7E+00                                           | 0.0E+00                                          |
| 3        | S <sub>1</sub> →S <sub>0</sub> | <sup>7</sup> F <sub>6</sub> → <sup>5</sup> G <sub>6</sub>  | 0.2        | 11577                        | 7.0E+06                     | 2.6E+03                                           | 3.3E+04                                           | 7.0E+06                                          |
| 4        | S <sub>1</sub> →S <sub>0</sub> | <sup>7</sup> F <sub>6</sub> → <sup>5</sup> L <sub>10</sub> | 0.0        | 11029                        | 2.2E+03                     | 2.2E+03                                           | 3.9E+01                                           | 0.0E+00                                          |
| 5        | S <sub>1</sub> →S <sub>0</sub> | <sup>7</sup> F <sub>6</sub> → <sup>5</sup> G <sub>5</sub>  | 0.1        | 10233                        | 1.8E+06                     | 1.1E+03                                           | 8.8E+04                                           | 1.7E+06                                          |
| 6        | S <sub>1</sub> →S <sub>0</sub> | <sup>7</sup> F <sub>6</sub> → <sup>5</sup> G <sub>4</sub>  | 0.0        | 9713                         | 1.3E+04                     | 1.1E+03                                           | 1.2E+04                                           | 0.0E+00                                          |
| 7        | S <sub>1</sub> →S <sub>0</sub> | <sup>7</sup> F <sub>6</sub> → <sup>5</sup> L <sub>9</sub>  | 0.0        | 9592                         | 6.7E+03                     | 6.3E+03                                           | 4.5E+02                                           | 0.0E+00                                          |
| 8        | S <sub>1</sub> →S <sub>0</sub> | <sup>7</sup> F <sub>6</sub> → <sup>5</sup> G <sub>3</sub>  | 0.0        | 9023                         | 3.9E+02                     | 3.2E+02                                           | 6.7E+01                                           | 0.0E+00                                          |
| 9        | S <sub>1</sub> →S <sub>0</sub> | <sup>7</sup> F <sub>6</sub> → <sup>5</sup> L <sub>8</sub>  | 0.0        | 8810                         | 5.8E+03                     | 5.8E+03                                           | 9.6E+01                                           | 0.0E+00                                          |
| 10       | S <sub>1</sub> →S <sub>0</sub> | <sup>7</sup> F <sub>6</sub> → <sup>5</sup> L <sub>7</sub>  | 0.0        | 8543                         | 1.8E+05                     | 3.7E+03                                           | 1.7E+05                                           | 6.9E+01                                          |
| 11       | S <sub>1</sub> →S <sub>0</sub> | <sup>7</sup> F <sub>6</sub> → <sup>5</sup> L <sub>6</sub>  | 0.1        | 8330                         | 1.8E+06                     | 0.0E+00                                           | 0.0E+00                                           | 1.8E+06                                          |
| 12       | S <sub>1</sub> →S <sub>0</sub> | <sup>7</sup> F <sub>6</sub> → <sup>5</sup> H <sub>7</sub>  | 0.2        | 6621                         | 6.2E+06                     | 0.0E+00                                           | 0.0E+00                                           | 6.2E+06                                          |
| 13       | S <sub>1</sub> →S <sub>0</sub> | <sup>7</sup> F <sub>6</sub> → <sup>5</sup> H <sub>6</sub>  | 3.7        | 5109                         | 1.1E+08                     | 0.0E+00                                           | 0.0E+00                                           | 1.1E+08                                          |
| 14       | S <sub>1</sub> →S <sub>0</sub> | <sup>7</sup> F <sub>6</sub> → <sup>5</sup> H <sub>5</sub>  | 0.0        | 4233                         | 1.7E+00                     | 0.0E+00                                           | 0.0E+00                                           | 1.7E+00                                          |
| 15       | S <sub>1</sub> →S <sub>0</sub> | <sup>7</sup> F <sub>6</sub> → <sup>5</sup> F <sub>5</sub>  | 15.8       | 3066                         | 4.6E+08                     | 0.0E+00                                           | 0.0E+00                                           | 4.6E+08                                          |
| 16       | S <sub>1</sub> →S <sub>0</sub> | <sup>7</sup> F <sub>6</sub> → <sup>5</sup> I <sub>7</sub>  | 1.0        | 1411                         | 2.8E+07                     | 0.0E+00                                           | 0.0E+00                                           | 2.8E+07                                          |
| 17       | S <sub>1</sub> →S <sub>0</sub> | <sup>7</sup> F <sub>6</sub> → <sup>5</sup> I <sub>6</sub>  | 15.1       | 402                          | 4.4E+08                     | 0.0E+00                                           | 0.0E+00                                           | 4.4E+08                                          |
| 18       | S <sub>1</sub> →S <sub>0</sub> | <sup>7</sup> F <sub>6</sub> → <sup>5</sup> I <sub>5</sub>  | 1.3        | 14                           | 3.7E+07                     | 0.0E+00                                           | 0.0E+00                                           | 3.7E+07                                          |
| 19       | S <sub>1</sub> →S <sub>0</sub> | <sup>7</sup> F <sub>6</sub> → <sup>5</sup> K <sub>5</sub>  | 0.0        | -3334                        | 1.2E-01                     | 0.0E+00                                           | 0.0E+00                                           | 1.2E-01                                          |
| 20       | S <sub>1</sub> →S <sub>0</sub> | <sup>7</sup> F <sub>6</sub> → <sup>5</sup> K <sub>7</sub>  | 0.0        | -3693                        | 2.3E-09                     | 0.0E+00                                           | 0.0E+00                                           | 2.3E-09                                          |
| 21       | S <sub>1</sub> →S <sub>0</sub> | <sup>7</sup> F <sub>5</sub> → <sup>5</sup> D <sub>4</sub>  | 0.0        | 19604                        | 2.2E+01                     | 1.9E-03                                           | 6.8E+00                                           | 1.5E+01                                          |
| 22       | S <sub>1</sub> →S <sub>0</sub> | <sup>7</sup> F <sub>5</sub> → <sup>5</sup> D <sub>3</sub>  | 0.0        | 13812                        | 1.1E+03                     | 6.8E+00                                           | 1.1E+03                                           | 0.0E+00                                          |
| 23       | S <sub>1</sub> →S <sub>0</sub> | <sup>7</sup> F <sub>5</sub> → <sup>5</sup> G <sub>6</sub>  | 0.0        | 13625                        | 1.3E+05                     | 3.0E+01                                           | 1.0E+04                                           | 1.2E+05                                          |
| 24       | S <sub>1</sub> →S <sub>0</sub> | <sup>7</sup> F <sub>5</sub> → <sup>5</sup> L <sub>10</sub> | 0.0        | 13077                        | 7.9E+00                     | 7.8E+00                                           | 7.9E-02                                           | 0.0E+00                                          |
| 25       | S <sub>1</sub> →S <sub>0</sub> | <sup>7</sup> F <sub>5</sub> → <sup>5</sup> G <sub>5</sub>  | 0.1        | 12281                        | 1.7E+06                     | 8.2E+01                                           | 1.2E+03                                           | 1.7E+06                                          |
| 26       | S <sub>1</sub> →S <sub>0</sub> | <sup>7</sup> F <sub>5</sub> → <sup>5</sup> D <sub>2</sub>  | 0.0        | 11941                        | 1.1E+02                     | 3.5E+01                                           | 7.2E+01                                           | 0.0E+00                                          |
| 27       | S <sub>1</sub> →S <sub>0</sub> | <sup>7</sup> F <sub>5</sub> → <sup>5</sup> G <sub>4</sub>  | 0.0        | 11761                        | 3.9E+05                     | 4.6E+01                                           | 1.0E+04                                           | 3.8E+05                                          |
| 28       | S <sub>1</sub> →S <sub>0</sub> | <sup>7</sup> F <sub>5</sub> → <sup>5</sup> L <sub>9</sub>  | 0.0        | 11640                        | 3.7E+02                     | 3.4E+02                                           | 2.9E+01                                           | 0.0E+00                                          |
| 29       | S <sub>1</sub> →S <sub>0</sub> | <sup>7</sup> F <sub>5</sub> → <sup>5</sup> L <sub>8</sub>  | 0.0        | 10858                        | 1.3E+03                     | 1.1E+03                                           | 1.6E+02                                           | 0.0E+00                                          |
| 30       | S <sub>1</sub> →S <sub>0</sub> | <sup>7</sup> F <sub>5</sub> → <sup>5</sup> L <sub>7</sub>  | 0.0        | 10591                        | 1.3E+04                     | 4.5E+02                                           | 1.3E+04                                           | 0.0E+00                                          |
| 31       | S <sub>1</sub> →S <sub>0</sub> | <sup>7</sup> F <sub>5</sub> → <sup>5</sup> I <sub>6</sub>  | 0.0        | 10378                        | 5.7E+04                     | 0.0E+00                                           | 0.0E+00                                           | 5.7E+04                                          |
| 32       | S <sub>1</sub> →S <sub>0</sub> | <sup>7</sup> F <sub>5</sub> → <sup>5</sup> H <sub>6</sub>  | 0.2        | 7157                         | 5.6E+06                     | 0.0E+00                                           | 0.0E+00                                           | 5.6E+06                                          |
| 33       | S <sub>1</sub> →S <sub>0</sub> | <sup>7</sup> F <sub>5</sub> → <sup>5</sup> H <sub>5</sub>  | 4.0        | 6281                         | 1.2E+08                     | 0.0E+00                                           | 0.0E+00                                           | 1.2E+08                                          |
| 34       | S <sub>1</sub> →S <sub>0</sub> | <sup>7</sup> F <sub>5</sub> → <sup>5</sup> H <sub>4</sub>  | 12.3       | 5709                         | 3.6E+08                     | 0.0E+00                                           | 0.0E+00                                           | 3.6E+08                                          |
| 35       | S <sub>1</sub> →S <sub>0</sub> | <sup>7</sup> F <sub>5</sub> → <sup>5</sup> F <sub>5</sub>  | 9.4        | 5114                         | 2.7E+08                     | 0.0E+00                                           | 0.0E+00                                           | 2.7E+08                                          |
| 36       | S <sub>1</sub> →S <sub>0</sub> | <sup>7</sup> F <sub>5</sub> → <sup>5</sup> F <sub>4</sub>  | 34.3       | 4674                         | 9.9E+08                     | 0.0E+00                                           | 0.0E+00                                           | 9.9E+08                                          |
| 37       | S <sub>1</sub> →S <sub>0</sub> | <sup>7</sup> F <sub>5</sub> → <sup>5</sup> I <sub>6</sub>  | 2.1        | 2450                         | 6.0E+07                     | 0.0E+00                                           | 0.0E+00                                           | 6.0E+07                                          |
| 38       | S <sub>1</sub> →S <sub>0</sub> | <sup>7</sup> F <sub>5</sub> → <sup>5</sup> I <sub>4</sub>  | 0.0        | 2440                         | 6.1E+04                     | 0.0E+00                                           | 0.0E+00                                           | 6.1E+04                                          |
| 39       | S <sub>1</sub> →S <sub>0</sub> | <sup>7</sup> F <sub>5</sub> → <sup>5</sup> I <sub>5</sub>  | 0.2        | 2062                         | 4.5E+06                     | 0.0E+00                                           | 0.0E+00                                           | 4.5E+06                                          |
| 40       | S <sub>1</sub> →S <sub>0</sub> | <sup>7</sup> F <sub>5</sub> → <sup>5</sup> K <sub>5</sub>  | 0.0        | -1286                        | 2.8E+03                     | 0.0E+00                                           | 0.0E+00                                           | 2.8E+03                                          |
|          |                                |                                                            |            | <i>W</i> <sup>S</sup>        | 2.9×10 <sup>9</sup>         |                                                   |                                                   |                                                  |
| 41       | T <sub>1</sub> →S <sub>0</sub> | <sup>7</sup> F <sub>6</sub> → <sup>5</sup> D <sub>4</sub>  | 0.0        | 1767                         | 1.5E+02                     | 3.1E-01                                           | 1.4E+02                                           | 0.0E+00                                          |

|    |                       |                                  |       |        |                   |         |         |         |
|----|-----------------------|----------------------------------|-------|--------|-------------------|---------|---------|---------|
| 42 | $T_1 \rightarrow S_0$ | ${}^7F_6 \rightarrow {}^5D_3$    | 0.0   | -4025  | 7.6E-10           | 6.4E-10 | 1.2E-10 | 0.0E+00 |
| 43 | $T_1 \rightarrow S_0$ | ${}^7F_6 \rightarrow {}^5G_6$    | 0.0   | -4212  | 4.9E-01           | 1.9E-08 | 2.4E-07 | 4.9E-01 |
| 44 | $T_1 \rightarrow S_0$ | ${}^7F_6 \rightarrow {}^5L_{10}$ | 0.0   | -4760  | 5.9E-10           | 5.8E-10 | 9.5E-12 | 0.0E+00 |
| 45 | $T_1 \rightarrow S_0$ | ${}^7F_6 \rightarrow {}^5G_5$    | 0.0   | -5556  | 3.4E-05           | 2.3E-12 | 1.8E-10 | 3.4E-05 |
| 46 | $T_1 \rightarrow S_0$ | ${}^7F_6 \rightarrow {}^5G_4$    | 0.0   | -6076  | 1.1E-12           | 9.9E-14 | 1.0E-12 | 0.0E+00 |
| 47 | $T_1 \rightarrow S_0$ | ${}^7F_6 \rightarrow {}^5L_9$    | 0.0   | -6197  | 3.0E-13           | 2.8E-13 | 1.8E-14 | 0.0E+00 |
| 48 | $T_1 \rightarrow S_0$ | ${}^7F_6 \rightarrow {}^5G_3$    | 0.0   | -6766  | 5.5E-16           | 4.6E-16 | 8.9E-17 | 0.0E+00 |
| 49 | $T_1 \rightarrow S_0$ | ${}^7F_6 \rightarrow {}^5L_8$    | 0.0   | -6979  | 2.3E-15           | 2.3E-15 | 3.5E-17 | 0.0E+00 |
| 50 | $T_1 \rightarrow S_0$ | ${}^7F_6 \rightarrow {}^5L_7$    | 0.0   | -7246  | 6.5E-14           | 3.0E-16 | 1.3E-14 | 5.2E-14 |
| 51 | $T_1 \rightarrow S_0$ | ${}^7F_6 \rightarrow {}^5L_6$    | 0.0   | -7459  | 3.8E-10           | 0.0E+00 | 0.0E+00 | 3.8E-10 |
| 52 | $T_1 \rightarrow S_0$ | ${}^7F_6 \rightarrow {}^5H_7$    | 0.0   | -9168  | 4.6E-14           | 0.0E+00 | 0.0E+00 | 4.6E-14 |
| 53 | $T_1 \rightarrow S_0$ | ${}^7F_6 \rightarrow {}^5H_6$    | 0.0   | -10680 | 9.9E-17           | 0.0E+00 | 0.0E+00 | 9.9E-17 |
| 54 | $T_1 \rightarrow S_0$ | ${}^7F_6 \rightarrow {}^5H_5$    | 0.0   | -11556 | 8.7E-27           | 0.0E+00 | 0.0E+00 | 8.7E-27 |
| 55 | $T_1 \rightarrow S_0$ | ${}^7F_6 \rightarrow {}^5F_5$    | 0.0   | -12723 | 2.4E-21           | 0.0E+00 | 0.0E+00 | 2.4E-21 |
| 56 | $T_1 \rightarrow S_0$ | ${}^7F_6 \rightarrow {}^5I_7$    | 0.0   | -14378 | 8.9E-27           | 0.0E+00 | 0.0E+00 | 8.9E-27 |
| 57 | $T_1 \rightarrow S_0$ | ${}^7F_6 \rightarrow {}^5I_6$    | 0.0   | -15387 | 3.9E-28           | 0.0E+00 | 0.0E+00 | 3.9E-28 |
| 58 | $T_1 \rightarrow S_0$ | ${}^7F_6 \rightarrow {}^5I_5$    | 0.0   | -15775 | 3.4E-30           | 0.0E+00 | 0.0E+00 | 3.4E-30 |
| 59 | $T_1 \rightarrow S_0$ | ${}^7F_6 \rightarrow {}^5K_5$    | 0.0   | -19123 | 4.5E-40           | 0.0E+00 | 0.0E+00 | 4.5E-40 |
| 60 | $T_1 \rightarrow S_0$ | ${}^7F_6 \rightarrow {}^5K_7$    | 0.0   | -19482 | 6.1E-48           | 0.0E+00 | 0.0E+00 | 6.1E-48 |
| 61 | $T_1 \rightarrow S_0$ | ${}^7F_5 \rightarrow {}^5D_4$    | 100.0 | 3815   | 4.0E+07           | 5.4E-01 | 1.9E+03 | 4.0E+07 |
| 62 | $T_1 \rightarrow S_0$ | ${}^7F_5 \rightarrow {}^5D_3$    | 0.0   | -1977  | 6.8E-03           | 4.4E-05 | 6.7E-03 | 0.0E+00 |
| 63 | $T_1 \rightarrow S_0$ | ${}^7F_5 \rightarrow {}^5G_6$    | 0.0   | -2164  | 2.3E+03           | 6.3E-05 | 2.1E-02 | 2.3E+03 |
| 64 | $T_1 \rightarrow S_0$ | ${}^7F_5 \rightarrow {}^5L_{10}$ | 0.0   | -2712  | 5.7E-07           | 5.6E-07 | 5.1E-09 | 0.0E+00 |
| 65 | $T_1 \rightarrow S_0$ | ${}^7F_5 \rightarrow {}^5G_5$    | 0.0   | -3508  | 9.1E+00           | 4.5E-08 | 6.4E-07 | 9.1E+00 |
| 66 | $T_1 \rightarrow S_0$ | ${}^7F_5 \rightarrow {}^5D_2$    | 0.0   | -3848  | 7.1E-09           | 2.4E-09 | 4.7E-09 | 0.0E+00 |
| 67 | $T_1 \rightarrow S_0$ | ${}^7F_5 \rightarrow {}^5G_4$    | 0.0   | -4028  | 8.3E-02           | 1.1E-09 | 2.3E-07 | 8.3E-02 |
| 68 | $T_1 \rightarrow S_0$ | ${}^7F_5 \rightarrow {}^5L_9$    | 0.0   | -4149  | 4.0E-09           | 3.7E-09 | 3.0E-10 | 0.0E+00 |
| 69 | $T_1 \rightarrow S_0$ | ${}^7F_5 \rightarrow {}^5L_8$    | 0.0   | -4931  | 1.2E-10           | 1.1E-10 | 1.4E-11 | 0.0E+00 |
| 70 | $T_1 \rightarrow S_0$ | ${}^7F_5 \rightarrow {}^5L_7$    | 0.0   | -5198  | 2.4E-10           | 8.5E-12 | 2.3E-10 | 0.0E+00 |
| 71 | $T_1 \rightarrow S_0$ | ${}^7F_5 \rightarrow {}^5I_6$    | 0.0   | -5411  | 2.8E-06           | 0.0E+00 | 0.0E+00 | 2.8E-06 |
| 72 | $T_1 \rightarrow S_0$ | ${}^7F_5 \rightarrow {}^5H_6$    | 0.0   | -8632  | 1.0E-12           | 0.0E+00 | 0.0E+00 | 1.0E-12 |
| 73 | $T_1 \rightarrow S_0$ | ${}^7F_5 \rightarrow {}^5H_5$    | 0.0   | -9508  | 1.1E-13           | 0.0E+00 | 0.0E+00 | 1.1E-13 |
| 74 | $T_1 \rightarrow S_0$ | ${}^7F_5 \rightarrow {}^5H_4$    | 0.0   | -10080 | 1.2E-14           | 0.0E+00 | 0.0E+00 | 1.2E-14 |
| 75 | $T_1 \rightarrow S_0$ | ${}^7F_5 \rightarrow {}^5F_5$    | 0.0   | -10675 | 2.6E-16           | 0.0E+00 | 0.0E+00 | 2.6E-16 |
| 76 | $T_1 \rightarrow S_0$ | ${}^7F_5 \rightarrow {}^5F_4$    | 0.0   | -11115 | 6.9E-17           | 0.0E+00 | 0.0E+00 | 6.9E-17 |
| 77 | $T_1 \rightarrow S_0$ | ${}^7F_5 \rightarrow {}^5I_6$    | 0.0   | -13339 | 8.4E-24           | 0.0E+00 | 0.0E+00 | 8.4E-24 |
| 78 | $T_1 \rightarrow S_0$ | ${}^7F_5 \rightarrow {}^5I_4$    | 0.0   | -13349 | 8.0E-27           | 0.0E+00 | 0.0E+00 | 8.0E-27 |
| 79 | $T_1 \rightarrow S_0$ | ${}^7F_5 \rightarrow {}^5I_5$    | 0.0   | -13727 | 6.4E-26           | 0.0E+00 | 0.0E+00 | 6.4E-26 |
| 80 | $T_1 \rightarrow S_0$ | ${}^7F_5 \rightarrow {}^5K_5$    | 0.0   | -17075 | 6.9E-35           | 0.0E+00 | 0.0E+00 | 6.9E-35 |
|    |                       |                                  |       | $W^T$  | $4.0 \times 10^7$ |         |         |         |

**Table S16.** Backward (Tb-to-ligand) IET rates for  $\text{NEt}_4[\text{TbL}_4]$ .

| $p$ | donor                                                      | acceptor                       | contr. (%) | $\Delta$ (cm <sup>-1</sup> ) | $W_b$ (s <sup>-1</sup> ) | $W_{d-d}$ (s <sup>-1</sup> ) | $W_{d-m}$ (s <sup>-1</sup> ) | $W_{ex}$ (s <sup>-1</sup> ) |
|-----|------------------------------------------------------------|--------------------------------|------------|------------------------------|--------------------------|------------------------------|------------------------------|-----------------------------|
| 1   | <sup>5</sup> D <sub>4</sub> → <sup>7</sup> F <sub>6</sub>  | S <sub>0</sub> →S <sub>1</sub> | 0.0        | -17556                       | 2.3E-36                  | 4.7E-39                      | 2.3E-36                      | 0.0E+00                     |
| 2   | <sup>5</sup> D <sub>3</sub> → <sup>7</sup> F <sub>6</sub>  | S <sub>0</sub> →S <sub>1</sub> | 0.0        | -11764                       | 1.4E-23                  | 1.1E-23                      | 2.3E-24                      | 0.0E+00                     |
| 3   | <sup>5</sup> G <sub>6</sub> → <sup>7</sup> F <sub>6</sub>  | S <sub>0</sub> →S <sub>1</sub> | 0.0        | -11577                       | 3.8E-18                  | 1.4E-21                      | 1.8E-20                      | 3.8E-18                     |
| 4   | <sup>5</sup> L <sub>10</sub> → <sup>7</sup> F <sub>6</sub> | S <sub>0</sub> →S <sub>1</sub> | 0.0        | -11029                       | 1.1E-20                  | 1.0E-20                      | 1.8E-22                      | 0.0E+00                     |
| 5   | <sup>5</sup> G <sub>5</sub> → <sup>7</sup> F <sub>6</sub>  | S <sub>0</sub> →S <sub>1</sub> | 0.0        | -10233                       | 7.6E-16                  | 4.6E-19                      | 3.7E-17                      | 7.2E-16                     |
| 6   | <sup>5</sup> G <sub>4</sub> → <sup>7</sup> F <sub>6</sub>  | S <sub>0</sub> →S <sub>1</sub> | 0.0        | -9713                        | 8.0E-17                  | 6.9E-18                      | 7.4E-17                      | 0.0E+00                     |
| 7   | <sup>5</sup> L <sub>9</sub> → <sup>7</sup> F <sub>6</sub>  | S <sub>0</sub> →S <sub>1</sub> | 0.0        | -9592                        | 3.6E-17                  | 3.4E-17                      | 2.4E-18                      | 0.0E+00                     |
| 8   | <sup>5</sup> G <sub>3</sub> → <sup>7</sup> F <sub>6</sub>  | S <sub>0</sub> →S <sub>1</sub> | 0.0        | -9023                        | 8.9E-17                  | 7.3E-17                      | 1.5E-17                      | 0.0E+00                     |
| 9   | <sup>5</sup> L <sub>8</sub> → <sup>7</sup> F <sub>6</sub>  | S <sub>0</sub> →S <sub>1</sub> | 0.0        | -8810                        | 1.5E-15                  | 1.5E-15                      | 2.5E-17                      | 0.0E+00                     |
| 10  | <sup>5</sup> L <sub>7</sub> → <sup>7</sup> F <sub>6</sub>  | S <sub>0</sub> →S <sub>1</sub> | 0.0        | -8543                        | 1.9E-13                  | 4.1E-15                      | 1.9E-13                      | 7.4E-17                     |
| 11  | <sup>5</sup> L <sub>6</sub> → <sup>7</sup> F <sub>6</sub>  | S <sub>0</sub> →S <sub>1</sub> | 0.0        | -8330                        | 6.4E-12                  | 0.0E+00                      | 0.0E+00                      | 6.4E-12                     |
| 12  | <sup>5</sup> H <sub>7</sub> → <sup>7</sup> F <sub>6</sub>  | S <sub>0</sub> →S <sub>1</sub> | 0.0        | -6621                        | 7.2E-08                  | 0.0E+00                      | 0.0E+00                      | 7.2E-08                     |
| 13  | <sup>5</sup> H <sub>6</sub> → <sup>7</sup> F <sub>6</sub>  | S <sub>0</sub> →S <sub>1</sub> | 0.0        | -5109                        | 2.1E-03                  | 0.0E+00                      | 0.0E+00                      | 2.1E-03                     |
| 14  | <sup>5</sup> H <sub>5</sub> → <sup>7</sup> F <sub>6</sub>  | S <sub>0</sub> →S <sub>1</sub> | 0.0        | -4233                        | 2.7E-09                  | 0.0E+00                      | 0.0E+00                      | 2.7E-09                     |
| 15  | <sup>5</sup> F <sub>5</sub> → <sup>7</sup> F <sub>6</sub>  | S <sub>0</sub> →S <sub>1</sub> | 0.0        | -3066                        | 2.0E+02                  | 0.0E+00                      | 0.0E+00                      | 2.0E+02                     |
| 16  | <sup>5</sup> I <sub>7</sub> → <sup>7</sup> F <sub>6</sub>  | S <sub>0</sub> →S <sub>1</sub> | 0.0        | -1411                        | 2.7E+04                  | 0.0E+00                      | 0.0E+00                      | 2.7E+04                     |
| 17  | <sup>5</sup> I <sub>6</sub> → <sup>7</sup> F <sub>6</sub>  | S <sub>0</sub> →S <sub>1</sub> | 58.9       | -402                         | 6.3E+07                  | 0.0E+00                      | 0.0E+00                      | 6.3E+07                     |
| 18  | <sup>5</sup> I <sub>5</sub> → <sup>7</sup> F <sub>6</sub>  | S <sub>0</sub> →S <sub>1</sub> | 38.4       | -14                          | 4.1E+07                  | 0.0E+00                      | 0.0E+00                      | 4.1E+07                     |
| 19  | <sup>5</sup> K <sub>5</sub> → <sup>7</sup> F <sub>6</sub>  | S <sub>0</sub> →S <sub>1</sub> | 1.3        | 3334                         | 1.4E+06                  | 0.0E+00                      | 0.0E+00                      | 1.4E+06                     |
| 20  | <sup>5</sup> K <sub>7</sub> → <sup>7</sup> F <sub>6</sub>  | S <sub>0</sub> →S <sub>1</sub> | 0.0        | 3693                         | 1.1E-01                  | 0.0E+00                      | 0.0E+00                      | 1.1E-01                     |
| 21  | <sup>5</sup> D <sub>4</sub> → <sup>7</sup> F <sub>5</sub>  | S <sub>0</sub> →S <sub>1</sub> | 0.0        | -19604                       | 2.2E-40                  | 1.9E-44                      | 6.8E-41                      | 1.5E-40                     |
| 22  | <sup>5</sup> D <sub>3</sub> → <sup>7</sup> F <sub>5</sub>  | S <sub>0</sub> →S <sub>1</sub> | 0.0        | -13812                       | 1.9E-26                  | 1.2E-28                      | 1.9E-26                      | 0.0E+00                     |
| 23  | <sup>5</sup> G <sub>6</sub> → <sup>7</sup> F <sub>5</sub>  | S <sub>0</sub> →S <sub>1</sub> | 0.0        | -13625                       | 3.0E-24                  | 7.2E-28                      | 2.5E-25                      | 2.7E-24                     |
| 24  | <sup>5</sup> L <sub>10</sub> → <sup>7</sup> F <sub>5</sub> | S <sub>0</sub> →S <sub>1</sub> | 0.0        | -13077                       | 1.6E-27                  | 1.6E-27                      | 1.6E-29                      | 0.0E+00                     |
| 25  | <sup>5</sup> G <sub>5</sub> → <sup>7</sup> F <sub>5</sub>  | S <sub>0</sub> →S <sub>1</sub> | 0.0        | -12281                       | 3.2E-20                  | 1.5E-24                      | 2.2E-23                      | 3.2E-20                     |
| 26  | <sup>5</sup> D <sub>2</sub> → <sup>7</sup> F <sub>5</sub>  | S <sub>0</sub> →S <sub>1</sub> | 0.0        | -11941                       | 2.2E-23                  | 7.3E-24                      | 1.5E-23                      | 0.0E+00                     |
| 27  | <sup>5</sup> G <sub>4</sub> → <sup>7</sup> F <sub>5</sub>  | S <sub>0</sub> →S <sub>1</sub> | 0.0        | -11761                       | 1.1E-19                  | 1.3E-23                      | 2.8E-21                      | 1.0E-19                     |
| 28  | <sup>5</sup> L <sub>9</sub> → <sup>7</sup> F <sub>5</sub>  | S <sub>0</sub> →S <sub>1</sub> | 0.0        | -11640                       | 8.6E-23                  | 7.9E-23                      | 6.7E-24                      | 0.0E+00                     |
| 29  | <sup>5</sup> L <sub>8</sub> → <sup>7</sup> F <sub>5</sub>  | S <sub>0</sub> →S <sub>1</sub> | 0.0        | -10858                       | 1.5E-20                  | 1.3E-20                      | 1.8E-21                      | 0.0E+00                     |
| 30  | <sup>5</sup> L <sub>7</sub> → <sup>7</sup> F <sub>5</sub>  | S <sub>0</sub> →S <sub>1</sub> | 0.0        | -10591                       | 6.1E-19                  | 2.1E-20                      | 5.9E-19                      | 0.0E+00                     |
| 31  | <sup>5</sup> I <sub>6</sub> → <sup>7</sup> F <sub>5</sub>  | S <sub>0</sub> →S <sub>1</sub> | 0.0        | -10378                       | 8.5E-18                  | 0.0E+00                      | 0.0E+00                      | 8.5E-18                     |
| 32  | <sup>5</sup> H <sub>6</sub> → <sup>7</sup> F <sub>5</sub>  | S <sub>0</sub> →S <sub>1</sub> | 0.0        | -7157                        | 4.7E-09                  | 0.0E+00                      | 0.0E+00                      | 4.7E-09                     |
| 33  | <sup>5</sup> H <sub>5</sub> → <sup>7</sup> F <sub>5</sub>  | S <sub>0</sub> →S <sub>1</sub> | 0.0        | -6281                        | 8.0E-06                  | 0.0E+00                      | 0.0E+00                      | 8.0E-06                     |
| 34  | <sup>5</sup> H <sub>4</sub> → <sup>7</sup> F <sub>5</sub>  | S <sub>0</sub> →S <sub>1</sub> | 0.0        | -5709                        | 4.7E-04                  | 0.0E+00                      | 0.0E+00                      | 4.7E-04                     |
| 35  | <sup>5</sup> F <sub>5</sub> → <sup>7</sup> F <sub>5</sub>  | S <sub>0</sub> →S <sub>1</sub> | 0.0        | -5114                        | 5.2E-03                  | 0.0E+00                      | 0.0E+00                      | 5.2E-03                     |
| 36  | <sup>5</sup> F <sub>4</sub> → <sup>7</sup> F <sub>5</sub>  | S <sub>0</sub> →S <sub>1</sub> | 0.0        | -4674                        | 1.9E-01                  | 0.0E+00                      | 0.0E+00                      | 1.9E-01                     |
| 37  | <sup>5</sup> I <sub>6</sub> → <sup>7</sup> F <sub>5</sub>  | S <sub>0</sub> →S <sub>1</sub> | 0.0        | -2450                        | 3.7E+02                  | 0.0E+00                      | 0.0E+00                      | 3.7E+02                     |
| 38  | <sup>5</sup> I <sub>4</sub> → <sup>7</sup> F <sub>5</sub>  | S <sub>0</sub> →S <sub>1</sub> | 0.0        | -2440                        | 5.7E-01                  | 0.0E+00                      | 0.0E+00                      | 5.7E-01                     |
| 39  | <sup>5</sup> I <sub>5</sub> → <sup>7</sup> F <sub>5</sub>  | S <sub>0</sub> →S <sub>1</sub> | 0.0        | -2062                        | 2.1E+02                  | 0.0E+00                      | 0.0E+00                      | 2.1E+02                     |
| 40  | <sup>5</sup> K <sub>5</sub> → <sup>7</sup> F <sub>5</sub>  | S <sub>0</sub> →S <sub>1</sub> | 1.3        | 1286                         | 1.4E+06                  | 0.0E+00                      | 0.0E+00                      | 1.4E+06                     |
|     |                                                            |                                |            | $W_b^S$                      | 1.1×10 <sup>8</sup>      |                              |                              |                             |
| 41  | <sup>5</sup> D <sub>4</sub> → <sup>7</sup> F <sub>6</sub>  | S <sub>0</sub> →T <sub>1</sub> | 0.0        | -1767                        | 4.1E-02                  | 8.8E-05                      | 4.1E-02                      | 0.0E+00                     |

|    |                                  |                       |      |         |                   |         |         |         |
|----|----------------------------------|-----------------------|------|---------|-------------------|---------|---------|---------|
| 42 | ${}^5D_3 \rightarrow {}^7F_6$    | $S_0 \rightarrow T_1$ | 0.0  | 4025    | 3.9E-01           | 3.2E-01 | 6.3E-02 | 0.0E+00 |
| 43 | ${}^5G_6 \rightarrow {}^7F_6$    | $S_0 \rightarrow T_1$ | 47.1 | 4212    | 3.3E+08           | 1.3E+01 | 1.6E+02 | 3.3E+08 |
| 44 | ${}^5L_{10} \rightarrow {}^7F_6$ | $S_0 \rightarrow T_1$ | 0.0  | 4760    | 3.5E+00           | 3.4E+00 | 5.5E-02 | 0.0E+00 |
| 45 | ${}^5G_5 \rightarrow {}^7F_6$    | $S_0 \rightarrow T_1$ | 2.5  | 5556    | 1.8E+07           | 1.2E+00 | 9.6E+01 | 1.8E+07 |
| 46 | ${}^5G_4 \rightarrow {}^7F_6$    | $S_0 \rightarrow T_1$ | 0.0  | 6076    | 8.9E+00           | 7.8E-01 | 8.1E+00 | 0.0E+00 |
| 47 | ${}^5L_9 \rightarrow {}^7F_6$    | $S_0 \rightarrow T_1$ | 0.0  | 6197    | 2.0E+00           | 1.8E+00 | 1.2E-01 | 0.0E+00 |
| 48 | ${}^5G_3 \rightarrow {}^7F_6$    | $S_0 \rightarrow T_1$ | 0.0  | 6766    | 1.5E-01           | 1.3E-01 | 2.5E-02 | 0.0E+00 |
| 49 | ${}^5L_8 \rightarrow {}^7F_6$    | $S_0 \rightarrow T_1$ | 0.0  | 6979    | 7.5E-01           | 7.3E-01 | 1.1E-02 | 0.0E+00 |
| 50 | ${}^5L_7 \rightarrow {}^7F_6$    | $S_0 \rightarrow T_1$ | 0.0  | 7246    | 8.7E+01           | 3.9E-01 | 1.8E+01 | 6.8E+01 |
| 51 | ${}^5L_6 \rightarrow {}^7F_6$    | $S_0 \rightarrow T_1$ | 0.2  | 7459    | 1.6E+06           | 0.0E+00 | 0.0E+00 | 1.6E+06 |
| 52 | ${}^5H_7 \rightarrow {}^7F_6$    | $S_0 \rightarrow T_1$ | 0.1  | 9168    | 6.5E+05           | 0.0E+00 | 0.0E+00 | 6.5E+05 |
| 53 | ${}^5H_6 \rightarrow {}^7F_6$    | $S_0 \rightarrow T_1$ | 0.3  | 10680   | 2.4E+06           | 0.0E+00 | 0.0E+00 | 2.4E+06 |
| 54 | ${}^5H_5 \rightarrow {}^7F_6$    | $S_0 \rightarrow T_1$ | 0.0  | 11556   | 1.7E-02           | 0.0E+00 | 0.0E+00 | 1.7E-02 |
| 55 | ${}^5F_5 \rightarrow {}^7F_6$    | $S_0 \rightarrow T_1$ | 0.2  | 12723   | 1.3E+06           | 0.0E+00 | 0.0E+00 | 1.3E+06 |
| 56 | ${}^5I_7 \rightarrow {}^7F_6$    | $S_0 \rightarrow T_1$ | 0.0  | 14378   | 1.0E+04           | 0.0E+00 | 0.0E+00 | 1.0E+04 |
| 57 | ${}^5I_6 \rightarrow {}^7F_6$    | $S_0 \rightarrow T_1$ | 0.0  | 15387   | 6.8E+04           | 0.0E+00 | 0.0E+00 | 6.8E+04 |
| 58 | ${}^5I_5 \rightarrow {}^7F_6$    | $S_0 \rightarrow T_1$ | 0.0  | 15775   | 4.7E+03           | 0.0E+00 | 0.0E+00 | 4.7E+03 |
| 59 | ${}^5K_5 \rightarrow {}^7F_6$    | $S_0 \rightarrow T_1$ | 0.0  | 19123   | 6.3E+00           | 0.0E+00 | 0.0E+00 | 6.3E+00 |
| 60 | ${}^5K_7 \rightarrow {}^7F_6$    | $S_0 \rightarrow T_1$ | 0.0  | 19482   | 3.5E-07           | 0.0E+00 | 0.0E+00 | 3.5E-07 |
| 61 | ${}^5D_4 \rightarrow {}^7F_5$    | $S_0 \rightarrow T_1$ | 0.0  | -3815   | 4.9E-01           | 6.6E-09 | 2.3E-05 | 4.9E-01 |
| 62 | ${}^5D_3 \rightarrow {}^7F_5$    | $S_0 \rightarrow T_1$ | 0.0  | 1977    | 1.5E+02           | 9.7E-01 | 1.5E+02 | 0.0E+00 |
| 63 | ${}^5G_6 \rightarrow {}^7F_5$    | $S_0 \rightarrow T_1$ | 9.3  | 2164    | 6.6E+07           | 1.8E+00 | 6.1E+02 | 6.6E+07 |
| 64 | ${}^5L_{10} \rightarrow {}^7F_5$ | $S_0 \rightarrow T_1$ | 0.0  | 2712    | 1.4E-01           | 1.4E-01 | 1.3E-03 | 0.0E+00 |
| 65 | ${}^5G_5 \rightarrow {}^7F_5$    | $S_0 \rightarrow T_1$ | 28.9 | 3508    | 2.0E+08           | 1.0E+00 | 1.4E+01 | 2.0E+08 |
| 66 | ${}^5D_2 \rightarrow {}^7F_5$    | $S_0 \rightarrow T_1$ | 0.0  | 3848    | 1.8E+00           | 6.2E-01 | 1.2E+00 | 0.0E+00 |
| 67 | ${}^5G_4 \rightarrow {}^7F_5$    | $S_0 \rightarrow T_1$ | 4.0  | 4028    | 2.8E+07           | 3.6E-01 | 7.7E+01 | 2.8E+07 |
| 68 | ${}^5L_9 \rightarrow {}^7F_5$    | $S_0 \rightarrow T_1$ | 0.0  | 4149    | 1.2E+00           | 1.1E+00 | 8.5E-02 | 0.0E+00 |
| 69 | ${}^5L_8 \rightarrow {}^7F_5$    | $S_0 \rightarrow T_1$ | 0.0  | 4931    | 1.7E+00           | 1.5E+00 | 2.0E-01 | 0.0E+00 |
| 70 | ${}^5L_7 \rightarrow {}^7F_5$    | $S_0 \rightarrow T_1$ | 0.0  | 5198    | 1.4E+01           | 4.8E-01 | 1.3E+01 | 0.0E+00 |
| 71 | ${}^5L_6 \rightarrow {}^7F_5$    | $S_0 \rightarrow T_1$ | 0.1  | 5411    | 5.1E+05           | 0.0E+00 | 0.0E+00 | 5.1E+05 |
| 72 | ${}^5H_6 \rightarrow {}^7F_5$    | $S_0 \rightarrow T_1$ | 0.2  | 8632    | 1.1E+06           | 0.0E+00 | 0.0E+00 | 1.1E+06 |
| 73 | ${}^5H_5 \rightarrow {}^7F_5$    | $S_0 \rightarrow T_1$ | 1.4  | 9508    | 9.5E+06           | 0.0E+00 | 0.0E+00 | 9.5E+06 |
| 74 | ${}^5H_4 \rightarrow {}^7F_5$    | $S_0 \rightarrow T_1$ | 2.7  | 10080   | 1.9E+07           | 0.0E+00 | 0.0E+00 | 1.9E+07 |
| 75 | ${}^5F_5 \rightarrow {}^7F_5$    | $S_0 \rightarrow T_1$ | 0.9  | 10675   | 6.1E+06           | 0.0E+00 | 0.0E+00 | 6.1E+06 |
| 76 | ${}^5F_4 \rightarrow {}^7F_5$    | $S_0 \rightarrow T_1$ | 2.3  | 11115   | 1.7E+07           | 0.0E+00 | 0.0E+00 | 1.7E+07 |
| 77 | ${}^5I_6 \rightarrow {}^7F_5$    | $S_0 \rightarrow T_1$ | 0.0  | 13339   | 6.4E+04           | 0.0E+00 | 0.0E+00 | 6.4E+04 |
| 78 | ${}^5I_4 \rightarrow {}^7F_5$    | $S_0 \rightarrow T_1$ | 0.0  | 13349   | 9.3E+01           | 0.0E+00 | 0.0E+00 | 9.3E+01 |
| 79 | ${}^5I_5 \rightarrow {}^7F_5$    | $S_0 \rightarrow T_1$ | 0.0  | 13727   | 3.8E+03           | 0.0E+00 | 0.0E+00 | 3.8E+03 |
| 80 | ${}^5K_5 \rightarrow {}^7F_5$    | $S_0 \rightarrow T_1$ | 0.0  | 17075   | 4.2E+01           | 0.0E+00 | 0.0E+00 | 4.2E+01 |
|    |                                  |                       |      | $W_b^T$ | $7.1 \times 10^8$ |         |         |         |

**Table S17.** Forward (ligand-to-Tb) IET rates for **PPh<sub>4</sub>[TbL<sub>4</sub>]**.

| <i>p</i> | donor                          | acceptor                                                   | contr. (%) | $\Delta$ (cm <sup>-1</sup> ) | $W$ (s <sup>-1</sup> ) | $W_{d-d}$ (s <sup>-1</sup> ) | $W_{d-m}$ (s <sup>-1</sup> ) | $W_{ex}$ (s <sup>-1</sup> ) |
|----------|--------------------------------|------------------------------------------------------------|------------|------------------------------|------------------------|------------------------------|------------------------------|-----------------------------|
| 1        | S <sub>1</sub> →S <sub>0</sub> | <sup>7</sup> F <sub>6</sub> → <sup>5</sup> D <sub>4</sub>  | 0.0        | 14056                        | 3.6E+01                | 8.0E-02                      | 3.6E+01                      | 0.0E+00                     |
| 2        | S <sub>1</sub> →S <sub>0</sub> | <sup>7</sup> F <sub>6</sub> → <sup>5</sup> D <sub>3</sub>  | 0.0        | 8264                         | 1.9E+01                | 1.8E+01                      | 6.0E-01                      | 0.0E+00                     |
| 3        | S <sub>1</sub> →S <sub>0</sub> | <sup>7</sup> F <sub>6</sub> → <sup>5</sup> G <sub>6</sub>  | 2.5        | 8077                         | 1.1E+06                | 1.7E+03                      | 2.0E+04                      | 1.1E+06                     |
| 4        | S <sub>1</sub> →S <sub>0</sub> | <sup>7</sup> F <sub>6</sub> → <sup>5</sup> L <sub>10</sub> | 0.0        | 7529                         | 1.2E+03                | 1.2E+03                      | 1.8E+00                      | 0.0E+00                     |
| 5        | S <sub>1</sub> →S <sub>0</sub> | <sup>7</sup> F <sub>6</sub> → <sup>5</sup> G <sub>5</sub>  | 0.5        | 6733                         | 2.2E+05                | 4.7E+02                      | 3.6E+04                      | 1.8E+05                     |
| 6        | S <sub>1</sub> →S <sub>0</sub> | <sup>7</sup> F <sub>6</sub> → <sup>5</sup> G <sub>4</sub>  | 0.0        | 6213                         | 4.4E+03                | 3.9E+02                      | 4.0E+03                      | 0.0E+00                     |
| 7        | S <sub>1</sub> →S <sub>0</sub> | <sup>7</sup> F <sub>6</sub> → <sup>5</sup> L <sub>9</sub>  | 0.0        | 6092                         | 2.2E+03                | 2.2E+03                      | 2.3E+01                      | 0.0E+00                     |
| 8        | S <sub>1</sub> →S <sub>0</sub> | <sup>7</sup> F <sub>6</sub> → <sup>5</sup> G <sub>3</sub>  | 0.0        | 5523                         | 9.8E+01                | 9.5E+01                      | 3.1E+00                      | 0.0E+00                     |
| 9        | S <sub>1</sub> →S <sub>0</sub> | <sup>7</sup> F <sub>6</sub> → <sup>5</sup> L <sub>8</sub>  | 0.0        | 5310                         | 1.6E+03                | 1.6E+03                      | 2.2E+00                      | 0.0E+00                     |
| 10       | S <sub>1</sub> →S <sub>0</sub> | <sup>7</sup> F <sub>6</sub> → <sup>5</sup> L <sub>7</sub>  | 0.1        | 5043                         | 4.3E+04                | 9.5E+02                      | 4.2E+04                      | 4.4E+00                     |
| 11       | S <sub>1</sub> →S <sub>0</sub> | <sup>7</sup> F <sub>6</sub> → <sup>5</sup> L <sub>6</sub>  | 0.2        | 4830                         | 1.1E+05                | 0.0E+00                      | 0.0E+00                      | 1.1E+05                     |
| 12       | S <sub>1</sub> →S <sub>0</sub> | <sup>7</sup> F <sub>6</sub> → <sup>5</sup> H <sub>7</sub>  | 0.5        | 3121                         | 2.2E+05                | 0.0E+00                      | 0.0E+00                      | 2.2E+05                     |
| 13       | S <sub>1</sub> →S <sub>0</sub> | <sup>7</sup> F <sub>6</sub> → <sup>5</sup> H <sub>6</sub>  | 5.5        | 1609                         | 2.5E+06                | 0.0E+00                      | 0.0E+00                      | 2.5E+06                     |
| 14       | S <sub>1</sub> →S <sub>0</sub> | <sup>7</sup> F <sub>6</sub> → <sup>5</sup> H <sub>5</sub>  | 0.0        | 733                          | 3.0E-02                | 0.0E+00                      | 0.0E+00                      | 3.0E-02                     |
| 15       | S <sub>1</sub> →S <sub>0</sub> | <sup>7</sup> F <sub>6</sub> → <sup>5</sup> F <sub>5</sub>  | 1.5        | -434                         | 6.9E+05                | 0.0E+00                      | 0.0E+00                      | 6.9E+05                     |
| 16       | S <sub>1</sub> →S <sub>0</sub> | <sup>7</sup> F <sub>6</sub> → <sup>5</sup> I <sub>7</sub>  | 0.0        | -2089                        | 8.7E+00                | 0.0E+00                      | 0.0E+00                      | 8.7E+00                     |
| 17       | S <sub>1</sub> →S <sub>0</sub> | <sup>7</sup> F <sub>6</sub> → <sup>5</sup> I <sub>6</sub>  | 0.0        | -3098                        | 7.7E-01                | 0.0E+00                      | 0.0E+00                      | 7.7E-01                     |
| 18       | S <sub>1</sub> →S <sub>0</sub> | <sup>7</sup> F <sub>6</sub> → <sup>5</sup> I <sub>5</sub>  | 0.0        | -3486                        | 8.9E-03                | 0.0E+00                      | 0.0E+00                      | 8.9E-03                     |
| 19       | S <sub>1</sub> →S <sub>0</sub> | <sup>7</sup> F <sub>6</sub> → <sup>5</sup> K <sub>5</sub>  | 0.0        | -6834                        | 9.9E-12                | 0.0E+00                      | 0.0E+00                      | 9.9E-12                     |
| 20       | S <sub>1</sub> →S <sub>0</sub> | <sup>7</sup> F <sub>6</sub> → <sup>5</sup> K <sub>7</sub>  | 0.0        | -7193                        | 1.7E-19                | 0.0E+00                      | 0.0E+00                      | 1.7E-19                     |
| 21       | S <sub>1</sub> →S <sub>0</sub> | <sup>7</sup> F <sub>5</sub> → <sup>5</sup> D <sub>4</sub>  | 0.0        | 16104                        | 7.4E+01                | 1.3E-02                      | 4.7E+01                      | 2.7E+01                     |
| 22       | S <sub>1</sub> →S <sub>0</sub> | <sup>7</sup> F <sub>5</sub> → <sup>5</sup> D <sub>3</sub>  | 0.0        | 10312                        | 1.3E+03                | 8.6E+00                      | 1.2E+03                      | 0.0E+00                     |
| 23       | S <sub>1</sub> →S <sub>0</sub> | <sup>7</sup> F <sub>5</sub> → <sup>5</sup> G <sub>6</sub>  | 0.1        | 10125                        | 4.7E+04                | 3.6E+01                      | 1.2E+04                      | 3.5E+04                     |
| 24       | S <sub>1</sub> →S <sub>0</sub> | <sup>7</sup> F <sub>5</sub> → <sup>5</sup> L <sub>10</sub> | 0.0        | 9577                         | 7.9E+00                | 7.9E+00                      | 2.3E-03                      | 0.0E+00                     |
| 25       | S <sub>1</sub> →S <sub>0</sub> | <sup>7</sup> F <sub>5</sub> → <sup>5</sup> G <sub>5</sub>  | 0.8        | 8781                         | 3.5E+05                | 6.5E+01                      | 8.8E+02                      | 3.5E+05                     |
| 26       | S <sub>1</sub> →S <sub>0</sub> | <sup>7</sup> F <sub>5</sub> → <sup>5</sup> D <sub>2</sub>  | 0.0        | 8441                         | 3.4E+01                | 2.5E+01                      | 8.4E+00                      | 0.0E+00                     |
| 27       | S <sub>1</sub> →S <sub>0</sub> | <sup>7</sup> F <sub>5</sub> → <sup>5</sup> G <sub>4</sub>  | 0.2        | 8261                         | 7.1E+04                | 3.1E+01                      | 6.5E+03                      | 6.5E+04                     |
| 28       | S <sub>1</sub> →S <sub>0</sub> | <sup>7</sup> F <sub>5</sub> → <sup>5</sup> L <sub>9</sub>  | 0.0        | 8140                         | 2.2E+02                | 2.2E+02                      | 2.8E+00                      | 0.0E+00                     |
| 29       | S <sub>1</sub> →S <sub>0</sub> | <sup>7</sup> F <sub>5</sub> → <sup>5</sup> L <sub>8</sub>  | 0.0        | 7358                         | 6.0E+02                | 5.9E+02                      | 1.3E+01                      | 0.0E+00                     |
| 30       | S <sub>1</sub> →S <sub>0</sub> | <sup>7</sup> F <sub>5</sub> → <sup>5</sup> L <sub>7</sub>  | 0.0        | 7091                         | 5.9E+03                | 2.1E+02                      | 5.6E+03                      | 0.0E+00                     |
| 31       | S <sub>1</sub> →S <sub>0</sub> | <sup>7</sup> F <sub>5</sub> → <sup>5</sup> I <sub>6</sub>  | 0.0        | 6878                         | 6.4E+03                | 0.0E+00                      | 0.0E+00                      | 6.4E+03                     |
| 32       | S <sub>1</sub> →S <sub>0</sub> | <sup>7</sup> F <sub>5</sub> → <sup>5</sup> H <sub>6</sub>  | 0.5        | 3657                         | 2.4E+05                | 0.0E+00                      | 0.0E+00                      | 2.4E+05                     |
| 33       | S <sub>1</sub> →S <sub>0</sub> | <sup>7</sup> F <sub>5</sub> → <sup>5</sup> H <sub>5</sub>  | 8.3        | 2781                         | 3.8E+06                | 0.0E+00                      | 0.0E+00                      | 3.8E+06                     |
| 34       | S <sub>1</sub> →S <sub>0</sub> | <sup>7</sup> F <sub>5</sub> → <sup>5</sup> H <sub>4</sub>  | 21.5       | 2209                         | 9.7E+06                | 0.0E+00                      | 0.0E+00                      | 9.7E+06                     |
| 35       | S <sub>1</sub> →S <sub>0</sub> | <sup>7</sup> F <sub>5</sub> → <sup>5</sup> F <sub>5</sub>  | 13.8       | 1614                         | 6.2E+06                | 0.0E+00                      | 0.0E+00                      | 6.2E+06                     |
| 36       | S <sub>1</sub> →S <sub>0</sub> | <sup>7</sup> F <sub>5</sub> → <sup>5</sup> F <sub>4</sub>  | 43.9       | 1174                         | 2.0E+07                | 0.0E+00                      | 0.0E+00                      | 2.0E+07                     |
| 37       | S <sub>1</sub> →S <sub>0</sub> | <sup>7</sup> F <sub>5</sub> → <sup>5</sup> I <sub>6</sub>  | 0.0        | -1050                        | 3.9E+03                | 0.0E+00                      | 0.0E+00                      | 3.9E+03                     |
| 38       | S <sub>1</sub> →S <sub>0</sub> | <sup>7</sup> F <sub>5</sub> → <sup>5</sup> I <sub>4</sub>  | 0.0        | -1060                        | 3.7E+00                | 0.0E+00                      | 0.0E+00                      | 3.7E+00                     |
| 39       | S <sub>1</sub> →S <sub>0</sub> | <sup>7</sup> F <sub>5</sub> → <sup>5</sup> I <sub>5</sub>  | 0.0        | -1438                        | 3.9E+01                | 0.0E+00                      | 0.0E+00                      | 3.9E+01                     |
| 40       | S <sub>1</sub> →S <sub>0</sub> | <sup>7</sup> F <sub>5</sub> → <sup>5</sup> K <sub>5</sub>  | 0.0        | -4786                        | 4.3E-07                | 0.0E+00                      | 0.0E+00                      | 4.3E-07                     |
|          |                                |                                                            |            | $W^S$                        | 4.5×10 <sup>7</sup>    |                              |                              |                             |
| 41       | T <sub>1</sub> →S <sub>0</sub> | <sup>7</sup> F <sub>6</sub> → <sup>5</sup> D <sub>4</sub>  | 0.0        | 2346                         | 4.2E+00                | 9.3E-03                      | 4.2E+00                      | 0.0E+00                     |

|    |                       |                                  |      |        |                   |         |         |         |
|----|-----------------------|----------------------------------|------|--------|-------------------|---------|---------|---------|
| 42 | $T_1 \rightarrow S_0$ | ${}^7F_6 \rightarrow {}^5D_3$    | 0.0  | -3446  | 4.1E-10           | 4.0E-10 | 1.3E-11 | 0.0E+00 |
| 43 | $T_1 \rightarrow S_0$ | ${}^7F_6 \rightarrow {}^5G_6$    | 0.0  | -3633  | 8.1E-02           | 1.2E-08 | 1.5E-07 | 8.1E-02 |
| 44 | $T_1 \rightarrow S_0$ | ${}^7F_6 \rightarrow {}^5L_{10}$ | 0.0  | -4181  | 3.8E-10           | 3.8E-10 | 5.7E-13 | 0.0E+00 |
| 45 | $T_1 \rightarrow S_0$ | ${}^7F_6 \rightarrow {}^5G_5$    | 0.0  | -4977  | 6.2E-06           | 1.6E-12 | 1.2E-10 | 6.2E-06 |
| 46 | $T_1 \rightarrow S_0$ | ${}^7F_6 \rightarrow {}^5G_4$    | 0.0  | -5497  | 7.8E-13           | 7.1E-14 | 7.1E-13 | 0.0E+00 |
| 47 | $T_1 \rightarrow S_0$ | ${}^7F_6 \rightarrow {}^5L_9$    | 0.0  | -5618  | 2.0E-13           | 2.0E-13 | 2.0E-15 | 0.0E+00 |
| 48 | $T_1 \rightarrow S_0$ | ${}^7F_6 \rightarrow {}^5G_3$    | 0.0  | -6187  | 3.6E-16           | 3.4E-16 | 1.1E-17 | 0.0E+00 |
| 49 | $T_1 \rightarrow S_0$ | ${}^7F_6 \rightarrow {}^5L_8$    | 0.0  | -6400  | 1.7E-15           | 1.7E-15 | 2.3E-18 | 0.0E+00 |
| 50 | $T_1 \rightarrow S_0$ | ${}^7F_6 \rightarrow {}^5L_7$    | 0.0  | -6667  | 2.1E-14           | 2.3E-16 | 1.0E-14 | 1.1E-14 |
| 51 | $T_1 \rightarrow S_0$ | ${}^7F_6 \rightarrow {}^5L_6$    | 0.0  | -6880  | 8.0E-11           | 0.0E+00 | 0.0E+00 | 8.0E-11 |
| 52 | $T_1 \rightarrow S_0$ | ${}^7F_6 \rightarrow {}^5H_7$    | 0.0  | -8589  | 1.1E-14           | 0.0E+00 | 0.0E+00 | 1.1E-14 |
| 53 | $T_1 \rightarrow S_0$ | ${}^7F_6 \rightarrow {}^5H_6$    | 0.0  | -10101 | 2.8E-17           | 0.0E+00 | 0.0E+00 | 2.8E-17 |
| 54 | $T_1 \rightarrow S_0$ | ${}^7F_6 \rightarrow {}^5H_5$    | 0.0  | -10977 | 2.7E-27           | 0.0E+00 | 0.0E+00 | 2.7E-27 |
| 55 | $T_1 \rightarrow S_0$ | ${}^7F_6 \rightarrow {}^5F_5$    | 0.0  | -12144 | 8.6E-22           | 0.0E+00 | 0.0E+00 | 8.6E-22 |
| 56 | $T_1 \rightarrow S_0$ | ${}^7F_6 \rightarrow {}^5I_7$    | 0.0  | -13799 | 3.9E-27           | 0.0E+00 | 0.0E+00 | 3.9E-27 |
| 57 | $T_1 \rightarrow S_0$ | ${}^7F_6 \rightarrow {}^5I_6$    | 0.0  | -14808 | 2.0E-28           | 0.0E+00 | 0.0E+00 | 2.0E-28 |
| 58 | $T_1 \rightarrow S_0$ | ${}^7F_6 \rightarrow {}^5I_5$    | 0.0  | -15196 | 1.8E-30           | 0.0E+00 | 0.0E+00 | 1.8E-30 |
| 59 | $T_1 \rightarrow S_0$ | ${}^7F_6 \rightarrow {}^5K_5$    | 0.0  | -18544 | 4.0E-40           | 0.0E+00 | 0.0E+00 | 4.0E-40 |
| 60 | $T_1 \rightarrow S_0$ | ${}^7F_6 \rightarrow {}^5K_7$    | 0.0  | -18903 | 5.8E-48           | 0.0E+00 | 0.0E+00 | 5.8E-48 |
| 61 | $T_1 \rightarrow S_0$ | ${}^7F_5 \rightarrow {}^5D_4$    | 99.9 | 4394   | 3.1E+05           | 1.5E-02 | 5.3E+01 | 3.1E+05 |
| 62 | $T_1 \rightarrow S_0$ | ${}^7F_5 \rightarrow {}^5D_3$    | 0.0  | -1398  | 3.6E-03           | 2.5E-05 | 3.6E-03 | 0.0E+00 |
| 63 | $T_1 \rightarrow S_0$ | ${}^7F_5 \rightarrow {}^5G_6$    | 0.1  | -1585  | 3.3E+02           | 3.5E-05 | 1.1E-02 | 3.3E+02 |
| 64 | $T_1 \rightarrow S_0$ | ${}^7F_5 \rightarrow {}^5L_{10}$ | 0.0  | -2133  | 3.2E-07           | 3.2E-07 | 9.0E-11 | 0.0E+00 |
| 65 | $T_1 \rightarrow S_0$ | ${}^7F_5 \rightarrow {}^5G_5$    | 0.0  | -2929  | 1.4E+00           | 2.7E-08 | 3.7E-07 | 1.4E+00 |
| 66 | $T_1 \rightarrow S_0$ | ${}^7F_5 \rightarrow {}^5D_2$    | 0.0  | -3269  | 2.0E-09           | 1.5E-09 | 4.9E-10 | 0.0E+00 |
| 67 | $T_1 \rightarrow S_0$ | ${}^7F_5 \rightarrow {}^5G_4$    | 0.0  | -3449  | 1.3E-02           | 6.5E-10 | 1.4E-07 | 1.3E-02 |
| 68 | $T_1 \rightarrow S_0$ | ${}^7F_5 \rightarrow {}^5L_9$    | 0.0  | -3570  | 2.4E-09           | 2.3E-09 | 2.9E-11 | 0.0E+00 |
| 69 | $T_1 \rightarrow S_0$ | ${}^7F_5 \rightarrow {}^5L_8$    | 0.0  | -4352  | 7.3E-11           | 7.1E-11 | 1.5E-12 | 0.0E+00 |
| 70 | $T_1 \rightarrow S_0$ | ${}^7F_5 \rightarrow {}^5L_7$    | 0.0  | -4619  | 1.5E-10           | 5.7E-12 | 1.5E-10 | 0.0E+00 |
| 71 | $T_1 \rightarrow S_0$ | ${}^7F_5 \rightarrow {}^5I_6$    | 0.0  | -4832  | 4.9E-07           | 0.0E+00 | 0.0E+00 | 4.9E-07 |
| 72 | $T_1 \rightarrow S_0$ | ${}^7F_5 \rightarrow {}^5H_6$    | 0.0  | -8053  | 2.4E-13           | 0.0E+00 | 0.0E+00 | 2.4E-13 |
| 73 | $T_1 \rightarrow S_0$ | ${}^7F_5 \rightarrow {}^5H_5$    | 0.0  | -8929  | 2.8E-14           | 0.0E+00 | 0.0E+00 | 2.8E-14 |
| 74 | $T_1 \rightarrow S_0$ | ${}^7F_5 \rightarrow {}^5H_4$    | 0.0  | -9501  | 3.1E-15           | 0.0E+00 | 0.0E+00 | 3.1E-15 |
| 75 | $T_1 \rightarrow S_0$ | ${}^7F_5 \rightarrow {}^5F_5$    | 0.0  | -10096 | 7.3E-17           | 0.0E+00 | 0.0E+00 | 7.3E-17 |
| 76 | $T_1 \rightarrow S_0$ | ${}^7F_5 \rightarrow {}^5F_4$    | 0.0  | -10536 | 2.1E-17           | 0.0E+00 | 0.0E+00 | 2.1E-17 |
| 77 | $T_1 \rightarrow S_0$ | ${}^7F_5 \rightarrow {}^5I_6$    | 0.0  | -12760 | 3.3E-24           | 0.0E+00 | 0.0E+00 | 3.3E-24 |
| 78 | $T_1 \rightarrow S_0$ | ${}^7F_5 \rightarrow {}^5I_4$    | 0.0  | -12770 | 3.1E-27           | 0.0E+00 | 0.0E+00 | 3.1E-27 |
| 79 | $T_1 \rightarrow S_0$ | ${}^7F_5 \rightarrow {}^5I_5$    | 0.0  | -13148 | 2.6E-26           | 0.0E+00 | 0.0E+00 | 2.6E-26 |
| 80 | $T_1 \rightarrow S_0$ | ${}^7F_5 \rightarrow {}^5K_5$    | 0.0  | -16496 | 4.5E-35           | 0.0E+00 | 0.0E+00 | 4.5E-35 |
|    |                       |                                  |      | $W^T$  | $3.1 \times 10^5$ |         |         |         |

**Table S18.** Backward (Tb-to-ligand) IET rates for **PPh<sub>4</sub>[TbL<sub>4</sub>]**

| <i>p</i> | donor                                                      | acceptor                       | contr. (%) | $\Delta$ (cm <sup>-1</sup> ) | $W_b$ (s <sup>-1</sup> ) | $W_{d-d}$ (s <sup>-1</sup> ) | $W_{d-m}$ (s <sup>-1</sup> ) | $W_{ex}$ (s <sup>-1</sup> ) |
|----------|------------------------------------------------------------|--------------------------------|------------|------------------------------|--------------------------|------------------------------|------------------------------|-----------------------------|
| 1        | <sup>5</sup> D <sub>4</sub> → <sup>7</sup> F <sub>6</sub>  | S <sub>0</sub> →S <sub>1</sub> | 0.0        | -14056                       | 1.8E-28                  | 4.0E-31                      | 1.8E-28                      | 0.0E+00                     |
| 2        | <sup>5</sup> D <sub>3</sub> → <sup>7</sup> F <sub>6</sub>  | S <sub>0</sub> →S <sub>1</sub> | 0.0        | -8264                        | 1.7E-16                  | 1.6E-16                      | 5.4E-18                      | 0.0E+00                     |
| 3        | <sup>5</sup> G <sub>6</sub> → <sup>7</sup> F <sub>6</sub>  | S <sub>0</sub> →S <sub>1</sub> | 0.0        | -8077                        | 1.4E-11                  | 2.0E-14                      | 2.4E-13                      | 1.3E-11                     |
| 4        | <sup>5</sup> L <sub>10</sub> → <sup>7</sup> F <sub>6</sub> | S <sub>0</sub> →S <sub>1</sub> | 0.0        | -7529                        | 1.2E-13                  | 1.2E-13                      | 1.9E-16                      | 0.0E+00                     |
| 5        | <sup>5</sup> G <sub>5</sub> → <sup>7</sup> F <sub>6</sub>  | S <sub>0</sub> →S <sub>1</sub> | 0.0        | -6733                        | 2.0E-09                  | 4.3E-12                      | 3.3E-10                      | 1.7E-09                     |
| 6        | <sup>5</sup> G <sub>4</sub> → <sup>7</sup> F <sub>6</sub>  | S <sub>0</sub> →S <sub>1</sub> | 0.0        | -6213                        | 6.0E-10                  | 5.4E-11                      | 5.5E-10                      | 0.0E+00                     |
| 7        | <sup>5</sup> L <sub>9</sub> → <sup>7</sup> F <sub>6</sub>  | S <sub>0</sub> →S <sub>1</sub> | 0.0        | -6092                        | 2.6E-10                  | 2.6E-10                      | 2.6E-12                      | 0.0E+00                     |
| 8        | <sup>5</sup> G <sub>3</sub> → <sup>7</sup> F <sub>6</sub>  | S <sub>0</sub> →S <sub>1</sub> | 0.0        | -5523                        | 4.8E-10                  | 4.7E-10                      | 1.5E-11                      | 0.0E+00                     |
| 9        | <sup>5</sup> L <sub>8</sub> → <sup>7</sup> F <sub>6</sub>  | S <sub>0</sub> →S <sub>1</sub> | 0.0        | -5310                        | 9.1E-09                  | 9.0E-09                      | 1.2E-11                      | 0.0E+00                     |
| 10       | <sup>5</sup> L <sub>7</sub> → <sup>7</sup> F <sub>6</sub>  | S <sub>0</sub> →S <sub>1</sub> | 0.0        | -5043                        | 1.0E-06                  | 2.2E-08                      | 9.8E-07                      | 1.0E-10                     |
| 11       | <sup>5</sup> L <sub>6</sub> → <sup>7</sup> F <sub>6</sub>  | S <sub>0</sub> →S <sub>1</sub> | 0.0        | -4830                        | 8.4E-06                  | 0.0E+00                      | 0.0E+00                      | 8.4E-06                     |
| 12       | <sup>5</sup> H <sub>7</sub> → <sup>7</sup> F <sub>6</sub>  | S <sub>0</sub> →S <sub>1</sub> | 0.0        | -3121                        | 5.6E-02                  | 0.0E+00                      | 0.0E+00                      | 5.6E-02                     |
| 13       | <sup>5</sup> H <sub>6</sub> → <sup>7</sup> F <sub>6</sub>  | S <sub>0</sub> →S <sub>1</sub> | 0.0        | -1609                        | 1.0E+03                  | 0.0E+00                      | 0.0E+00                      | 1.0E+03                     |
| 14       | <sup>5</sup> H <sub>5</sub> → <sup>7</sup> F <sub>6</sub>  | S <sub>0</sub> →S <sub>1</sub> | 0.0        | -733                         | 1.0E-03                  | 0.0E+00                      | 0.0E+00                      | 1.0E-03                     |
| 15       | <sup>5</sup> F <sub>5</sub> → <sup>7</sup> F <sub>6</sub>  | S <sub>0</sub> →S <sub>1</sub> | 65.8       | 434                          | 6.6E+06                  | 0.0E+00                      | 0.0E+00                      | 6.6E+06                     |
| 16       | <sup>5</sup> I <sub>7</sub> → <sup>7</sup> F <sub>6</sub>  | S <sub>0</sub> →S <sub>1</sub> | 1.8        | 2089                         | 1.8E+05                  | 0.0E+00                      | 0.0E+00                      | 1.8E+05                     |
| 17       | <sup>5</sup> I <sub>6</sub> → <sup>7</sup> F <sub>6</sub>  | S <sub>0</sub> →S <sub>1</sub> | 23.8       | 3098                         | 2.4E+06                  | 0.0E+00                      | 0.0E+00                      | 2.4E+06                     |
| 18       | <sup>5</sup> I <sub>5</sub> → <sup>7</sup> F <sub>6</sub>  | S <sub>0</sub> →S <sub>1</sub> | 2.1        | 3486                         | 2.1E+05                  | 0.0E+00                      | 0.0E+00                      | 2.1E+05                     |
| 19       | <sup>5</sup> K <sub>5</sub> → <sup>7</sup> F <sub>6</sub>  | S <sub>0</sub> →S <sub>1</sub> | 0.0        | 6834                         | 2.5E+03                  | 0.0E+00                      | 0.0E+00                      | 2.5E+03                     |
| 20       | <sup>5</sup> K <sub>7</sub> → <sup>7</sup> F <sub>6</sub>  | S <sub>0</sub> →S <sub>1</sub> | 0.0        | 7193                         | 1.7E-04                  | 0.0E+00                      | 0.0E+00                      | 1.7E-04                     |
| 21       | <sup>5</sup> D <sub>4</sub> → <sup>7</sup> F <sub>5</sub>  | S <sub>0</sub> →S <sub>1</sub> | 0.0        | -16104                       | 1.6E-32                  | 2.9E-36                      | 1.0E-32                      | 5.9E-33                     |
| 22       | <sup>5</sup> D <sub>3</sub> → <sup>7</sup> F <sub>5</sub>  | S <sub>0</sub> →S <sub>1</sub> | 0.0        | -10312                       | 4.8E-19                  | 3.3E-21                      | 4.8E-19                      | 0.0E+00                     |
| 23       | <sup>5</sup> G <sub>6</sub> → <sup>7</sup> F <sub>5</sub>  | S <sub>0</sub> →S <sub>1</sub> | 0.0        | -10125                       | 2.4E-17                  | 1.8E-20                      | 6.0E-18                      | 1.8E-17                     |
| 24       | <sup>5</sup> L <sub>10</sub> → <sup>7</sup> F <sub>5</sub> | S <sub>0</sub> →S <sub>1</sub> | 0.0        | -9577                        | 3.5E-20                  | 3.5E-20                      | 1.0E-23                      | 0.0E+00                     |
| 25       | <sup>5</sup> G <sub>5</sub> → <sup>7</sup> F <sub>5</sub>  | S <sub>0</sub> →S <sub>1</sub> | 0.0        | -8781                        | 1.4E-13                  | 2.6E-17                      | 3.5E-16                      | 1.4E-13                     |
| 26       | <sup>5</sup> D <sub>2</sub> → <sup>7</sup> F <sub>5</sub>  | S <sub>0</sub> →S <sub>1</sub> | 0.0        | -8441                        | 1.5E-16                  | 1.1E-16                      | 3.8E-17                      | 0.0E+00                     |
| 27       | <sup>5</sup> G <sub>4</sub> → <sup>7</sup> F <sub>5</sub>  | S <sub>0</sub> →S <sub>1</sub> | 0.0        | -8261                        | 4.2E-13                  | 1.8E-16                      | 3.9E-14                      | 3.9E-13                     |
| 28       | <sup>5</sup> L <sub>9</sub> → <sup>7</sup> F <sub>5</sub>  | S <sub>0</sub> →S <sub>1</sub> | 0.0        | -8140                        | 1.1E-15                  | 1.1E-15                      | 1.4E-17                      | 0.0E+00                     |
| 29       | <sup>5</sup> L <sub>8</sub> → <sup>7</sup> F <sub>5</sub>  | S <sub>0</sub> →S <sub>1</sub> | 0.0        | -7358                        | 1.5E-13                  | 1.4E-13                      | 3.1E-15                      | 0.0E+00                     |
| 30       | <sup>5</sup> L <sub>7</sub> → <sup>7</sup> F <sub>5</sub>  | S <sub>0</sub> →S <sub>1</sub> | 0.0        | -7091                        | 5.9E-12                  | 2.2E-13                      | 5.7E-12                      | 0.0E+00                     |
| 31       | <sup>5</sup> I <sub>6</sub> → <sup>7</sup> F <sub>5</sub>  | S <sub>0</sub> →S <sub>1</sub> | 0.0        | -6878                        | 2.1E-11                  | 0.0E+00                      | 0.0E+00                      | 2.1E-11                     |
| 32       | <sup>5</sup> H <sub>6</sub> → <sup>7</sup> F <sub>5</sub>  | S <sub>0</sub> →S <sub>1</sub> | 0.0        | -3657                        | 4.3E-03                  | 0.0E+00                      | 0.0E+00                      | 4.3E-03                     |
| 33       | <sup>5</sup> H <sub>5</sub> → <sup>7</sup> F <sub>5</sub>  | S <sub>0</sub> →S <sub>1</sub> | 0.0        | -2781                        | 5.6E+00                  | 0.0E+00                      | 0.0E+00                      | 5.6E+00                     |
| 34       | <sup>5</sup> H <sub>4</sub> → <sup>7</sup> F <sub>5</sub>  | S <sub>0</sub> →S <sub>1</sub> | 0.0        | -2209                        | 2.8E+02                  | 0.0E+00                      | 0.0E+00                      | 2.8E+02                     |
| 35       | <sup>5</sup> F <sub>5</sub> → <sup>7</sup> F <sub>5</sub>  | S <sub>0</sub> →S <sub>1</sub> | 0.0        | -1614                        | 2.6E+03                  | 0.0E+00                      | 0.0E+00                      | 2.6E+03                     |
| 36       | <sup>5</sup> F <sub>4</sub> → <sup>7</sup> F <sub>5</sub>  | S <sub>0</sub> →S <sub>1</sub> | 0.8        | -1174                        | 8.4E+04                  | 0.0E+00                      | 0.0E+00                      | 8.4E+04                     |
| 37       | <sup>5</sup> I <sub>6</sub> → <sup>7</sup> F <sub>5</sub>  | S <sub>0</sub> →S <sub>1</sub> | 5.2        | 1050                         | 5.2E+05                  | 0.0E+00                      | 0.0E+00                      | 5.2E+05                     |
| 38       | <sup>5</sup> I <sub>4</sub> → <sup>7</sup> F <sub>5</sub>  | S <sub>0</sub> →S <sub>1</sub> | 0.0        | 1060                         | 7.5E+02                  | 0.0E+00                      | 0.0E+00                      | 7.5E+02                     |
| 39       | <sup>5</sup> I <sub>5</sub> → <sup>7</sup> F <sub>5</sub>  | S <sub>0</sub> →S <sub>1</sub> | 0.4        | 1438                         | 4.0E+04                  | 0.0E+00                      | 0.0E+00                      | 4.0E+04                     |
| 40       | <sup>5</sup> K <sub>5</sub> → <sup>7</sup> F <sub>5</sub>  | S <sub>0</sub> →S <sub>1</sub> | 0.0        | 4786                         | 4.6E+03                  | 0.0E+00                      | 0.0E+00                      | 4.6E+03                     |
|          |                                                            |                                |            | $W_b^S$                      | 1.0×10 <sup>7</sup>      |                              |                              |                             |
| 41       | <sup>5</sup> D <sub>4</sub> → <sup>7</sup> F <sub>6</sub>  | S <sub>0</sub> →T <sub>1</sub> | 0.0        | -2346                        | 7.4E-05                  | 1.6E-07                      | 7.3E-05                      | 0.0E+00                     |



|    |                                  |                       |      |         |                   |         |         |         |
|----|----------------------------------|-----------------------|------|---------|-------------------|---------|---------|---------|
| 42 | ${}^5D_3 \rightarrow {}^7F_6$    | $S_0 \rightarrow T_1$ | 0.0  | 3446    | 1.3E-02           | 1.2E-02 | 3.9E-04 | 0.0E+00 |
| 43 | ${}^5G_6 \rightarrow {}^7F_6$    | $S_0 \rightarrow T_1$ | 45.4 | 3633    | 3.3E+06           | 5.0E-01 | 6.0E+00 | 3.3E+06 |
| 44 | ${}^5L_{10} \rightarrow {}^7F_6$ | $S_0 \rightarrow T_1$ | 0.0  | 4181    | 1.4E-01           | 1.4E-01 | 2.0E-04 | 0.0E+00 |
| 45 | ${}^5G_5 \rightarrow {}^7F_6$    | $S_0 \rightarrow T_1$ | 2.7  | 4977    | 2.0E+05           | 5.1E-02 | 3.9E+00 | 2.0E+05 |
| 46 | ${}^5G_4 \rightarrow {}^7F_6$    | $S_0 \rightarrow T_1$ | 0.0  | 5497    | 3.7E-01           | 3.4E-02 | 3.4E-01 | 0.0E+00 |
| 47 | ${}^5L_9 \rightarrow {}^7F_6$    | $S_0 \rightarrow T_1$ | 0.0  | 5618    | 8.2E-02           | 8.1E-02 | 8.1E-04 | 0.0E+00 |
| 48 | ${}^5G_3 \rightarrow {}^7F_6$    | $S_0 \rightarrow T_1$ | 0.0  | 6187    | 6.1E-03           | 5.9E-03 | 1.9E-04 | 0.0E+00 |
| 49 | ${}^5L_8 \rightarrow {}^7F_6$    | $S_0 \rightarrow T_1$ | 0.0  | 6400    | 3.4E-02           | 3.4E-02 | 4.5E-05 | 0.0E+00 |
| 50 | ${}^5L_7 \rightarrow {}^7F_6$    | $S_0 \rightarrow T_1$ | 0.0  | 6667    | 1.7E+00           | 1.9E-02 | 8.2E-01 | 8.6E-01 |
| 51 | ${}^5L_6 \rightarrow {}^7F_6$    | $S_0 \rightarrow T_1$ | 0.3  | 6880    | 2.1E+04           | 0.0E+00 | 0.0E+00 | 2.1E+04 |
| 52 | ${}^5H_7 \rightarrow {}^7F_6$    | $S_0 \rightarrow T_1$ | 0.1  | 8589    | 9.7E+03           | 0.0E+00 | 0.0E+00 | 9.7E+03 |
| 53 | ${}^5H_6 \rightarrow {}^7F_6$    | $S_0 \rightarrow T_1$ | 0.6  | 10101   | 4.1E+04           | 0.0E+00 | 0.0E+00 | 4.1E+04 |
| 54 | ${}^5H_5 \rightarrow {}^7F_6$    | $S_0 \rightarrow T_1$ | 0.0  | 10977   | 3.2E-04           | 0.0E+00 | 0.0E+00 | 3.2E-04 |
| 55 | ${}^5F_5 \rightarrow {}^7F_6$    | $S_0 \rightarrow T_1$ | 0.4  | 12144   | 2.9E+04           | 0.0E+00 | 0.0E+00 | 2.9E+04 |
| 56 | ${}^5I_7 \rightarrow {}^7F_6$    | $S_0 \rightarrow T_1$ | 0.0  | 13799   | 2.8E+02           | 0.0E+00 | 0.0E+00 | 2.8E+02 |
| 57 | ${}^5I_6 \rightarrow {}^7F_6$    | $S_0 \rightarrow T_1$ | 0.0  | 14808   | 2.1E+03           | 0.0E+00 | 0.0E+00 | 2.1E+03 |
| 58 | ${}^5I_5 \rightarrow {}^7F_6$    | $S_0 \rightarrow T_1$ | 0.0  | 15196   | 1.5E+02           | 0.0E+00 | 0.0E+00 | 1.5E+02 |
| 59 | ${}^5K_5 \rightarrow {}^7F_6$    | $S_0 \rightarrow T_1$ | 0.0  | 18544   | 3.5E-01           | 0.0E+00 | 0.0E+00 | 3.5E-01 |
| 60 | ${}^5K_7 \rightarrow {}^7F_6$    | $S_0 \rightarrow T_1$ | 0.0  | 18903   | 2.1E-08           | 0.0E+00 | 0.0E+00 | 2.1E-08 |
| 61 | ${}^5D_4 \rightarrow {}^7F_5$    | $S_0 \rightarrow T_1$ | 0.0  | -4394   | 2.3E-04           | 1.2E-11 | 4.0E-08 | 2.3E-04 |
| 62 | ${}^5D_3 \rightarrow {}^7F_5$    | $S_0 \rightarrow T_1$ | 0.0  | 1398    | 4.8E+00           | 3.3E-02 | 4.8E+00 | 0.0E+00 |
| 63 | ${}^5G_6 \rightarrow {}^7F_5$    | $S_0 \rightarrow T_1$ | 8.0  | 1585    | 5.9E+05           | 6.3E-02 | 2.0E+01 | 5.9E+05 |
| 64 | ${}^5L_{10} \rightarrow {}^7F_5$ | $S_0 \rightarrow T_1$ | 0.0  | 2133    | 5.0E-03           | 5.0E-03 | 1.4E-06 | 0.0E+00 |
| 65 | ${}^5G_5 \rightarrow {}^7F_5$    | $S_0 \rightarrow T_1$ | 26.7 | 2929    | 2.0E+06           | 3.8E-02 | 5.1E-01 | 2.0E+06 |
| 66 | ${}^5D_2 \rightarrow {}^7F_5$    | $S_0 \rightarrow T_1$ | 0.0  | 3269    | 3.1E-02           | 2.4E-02 | 7.6E-03 | 0.0E+00 |
| 67 | ${}^5G_4 \rightarrow {}^7F_5$    | $S_0 \rightarrow T_1$ | 3.8  | 3449    | 2.8E+05           | 1.4E-02 | 2.8E+00 | 2.8E+05 |
| 68 | ${}^5L_9 \rightarrow {}^7F_5$    | $S_0 \rightarrow T_1$ | 0.0  | 3570    | 4.2E-02           | 4.1E-02 | 5.0E-04 | 0.0E+00 |
| 69 | ${}^5L_8 \rightarrow {}^7F_5$    | $S_0 \rightarrow T_1$ | 0.0  | 4352    | 6.2E-02           | 6.1E-02 | 1.3E-03 | 0.0E+00 |
| 70 | ${}^5L_7 \rightarrow {}^7F_5$    | $S_0 \rightarrow T_1$ | 0.0  | 4619    | 5.4E-01           | 2.0E-02 | 5.2E-01 | 0.0E+00 |
| 71 | ${}^5L_6 \rightarrow {}^7F_5$    | $S_0 \rightarrow T_1$ | 0.1  | 4832    | 5.6E+03           | 0.0E+00 | 0.0E+00 | 5.6E+03 |
| 72 | ${}^5H_6 \rightarrow {}^7F_5$    | $S_0 \rightarrow T_1$ | 0.2  | 8053    | 1.5E+04           | 0.0E+00 | 0.0E+00 | 1.5E+04 |
| 73 | ${}^5H_5 \rightarrow {}^7F_5$    | $S_0 \rightarrow T_1$ | 2.0  | 8929    | 1.5E+05           | 0.0E+00 | 0.0E+00 | 1.5E+05 |
| 74 | ${}^5H_4 \rightarrow {}^7F_5$    | $S_0 \rightarrow T_1$ | 4.2  | 9501    | 3.1E+05           | 0.0E+00 | 0.0E+00 | 3.1E+05 |
| 75 | ${}^5F_5 \rightarrow {}^7F_5$    | $S_0 \rightarrow T_1$ | 1.4  | 10096   | 1.1E+05           | 0.0E+00 | 0.0E+00 | 1.1E+05 |
| 76 | ${}^5F_4 \rightarrow {}^7F_5$    | $S_0 \rightarrow T_1$ | 4.1  | 10536   | 3.0E+05           | 0.0E+00 | 0.0E+00 | 3.0E+05 |
| 77 | ${}^5I_6 \rightarrow {}^7F_5$    | $S_0 \rightarrow T_1$ | 0.0  | 12760   | 1.5E+03           | 0.0E+00 | 0.0E+00 | 1.5E+03 |
| 78 | ${}^5I_4 \rightarrow {}^7F_5$    | $S_0 \rightarrow T_1$ | 0.0  | 12770   | 2.2E+00           | 0.0E+00 | 0.0E+00 | 2.2E+00 |
| 79 | ${}^5I_5 \rightarrow {}^7F_5$    | $S_0 \rightarrow T_1$ | 0.0  | 13148   | 9.3E+01           | 0.0E+00 | 0.0E+00 | 9.3E+01 |
| 80 | ${}^5K_5 \rightarrow {}^7F_5$    | $S_0 \rightarrow T_1$ | 0.0  | 16496   | 1.7E+00           | 0.0E+00 | 0.0E+00 | 1.7E+00 |
|    |                                  |                       |      | $W_b^T$ | $7.4 \times 10^6$ |         |         |         |

### 3. Figures

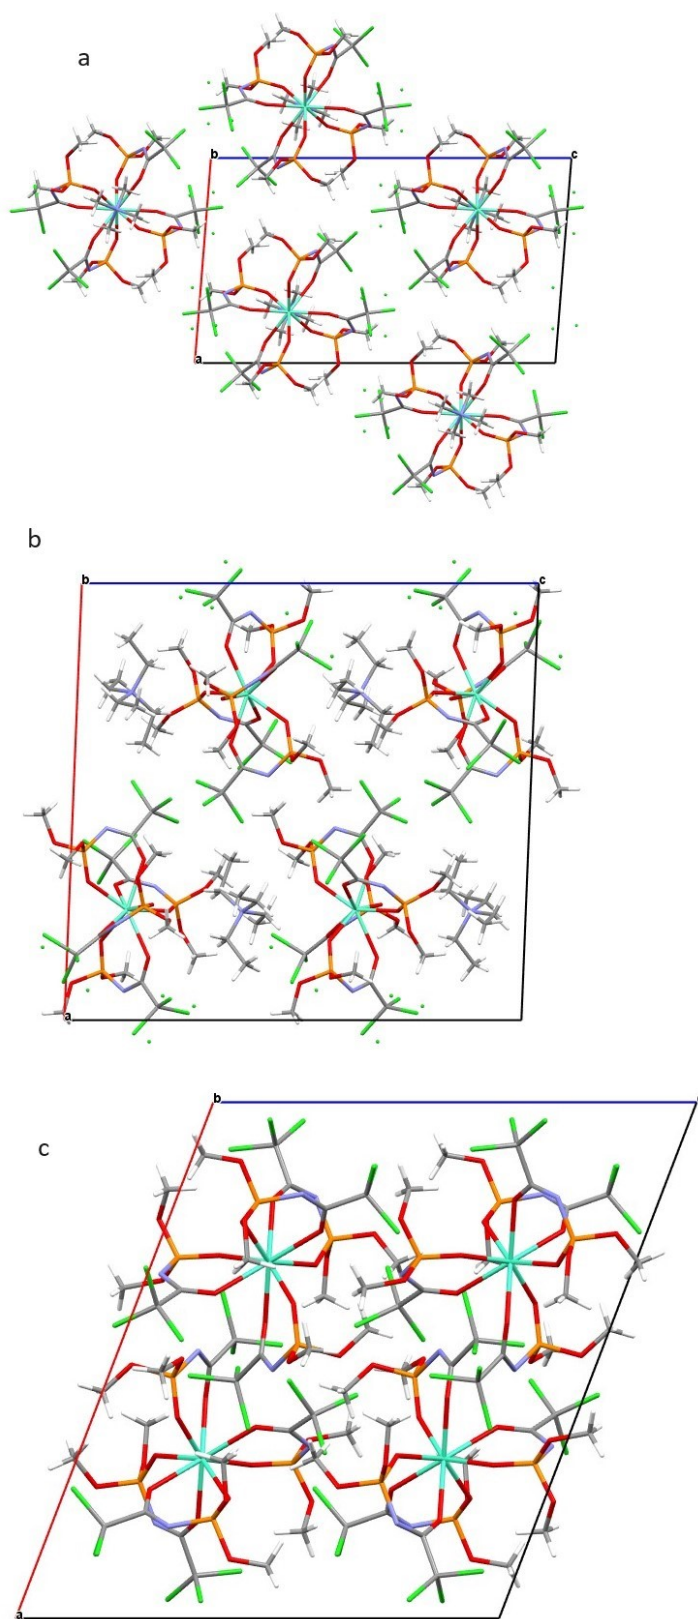

**Figure S1.** The crystal packing of  $\text{NMe}_4[\text{EuL}_4]$  (a),  $\text{NEt}_4[\text{EuL}_4]$  (b),  $\text{PPh}_4[\text{GdL}_4]$  (the cations are omitted) (c) viewed along the b-axis direction.

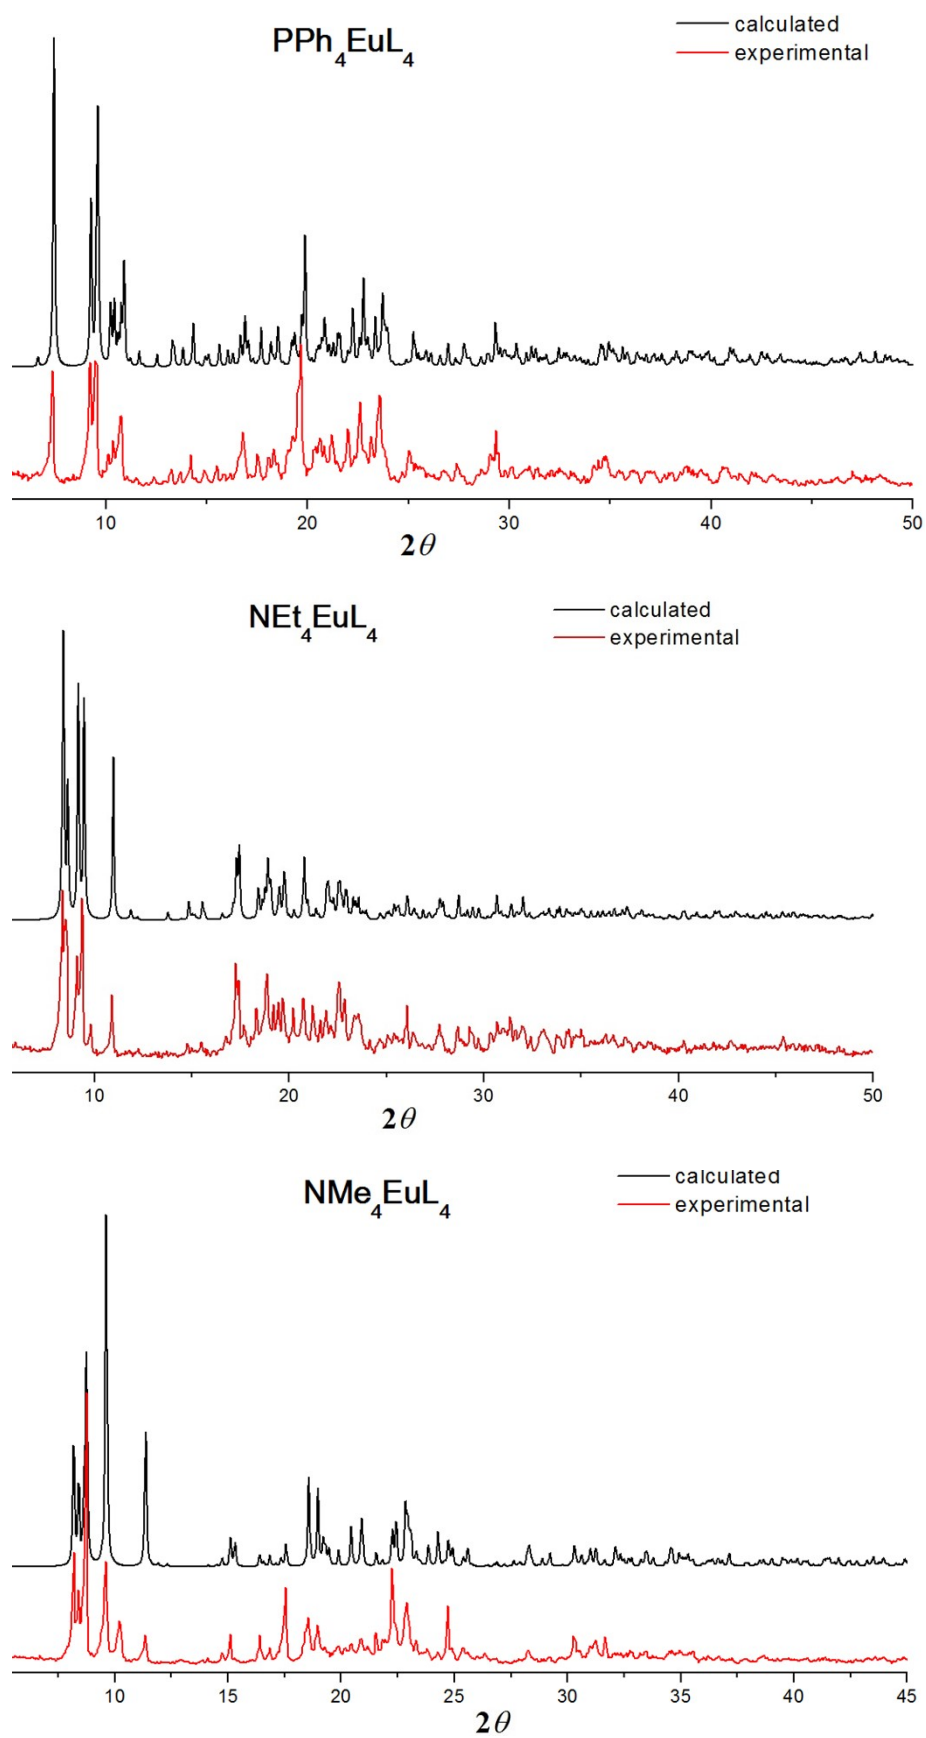

**Figure S2.** Calculated and experimental XRD patterns for the obtained europium complexes.

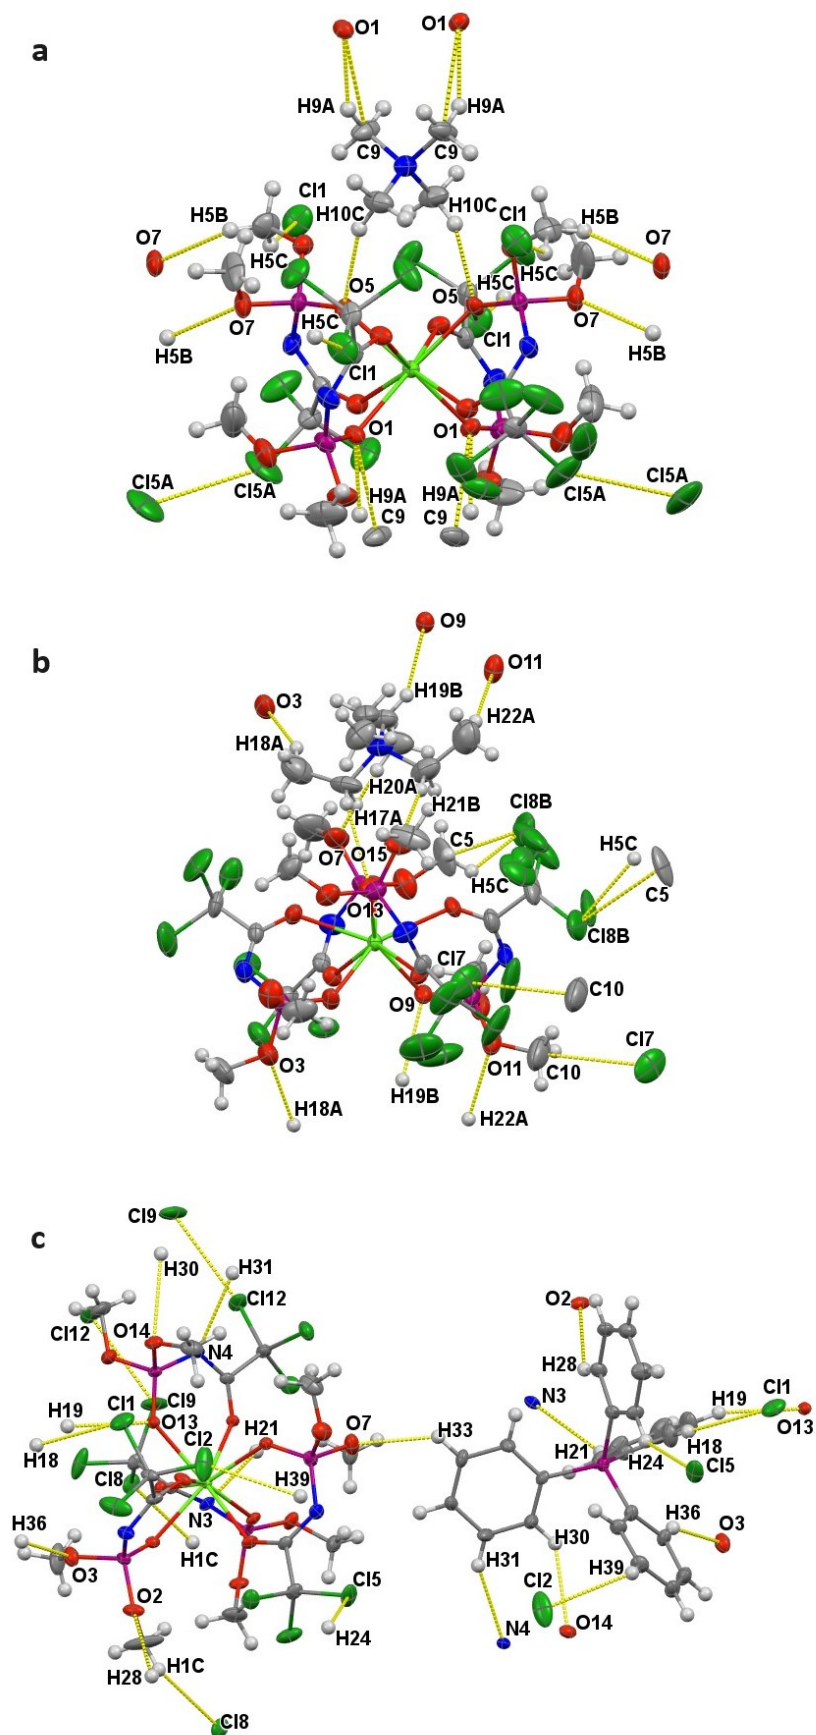

**Figure S3.** The inter- and intramolecular interactions in  $\text{NMe}_4[\text{EuL}_4]$  (a),  $\text{NET}_4[\text{EuL}_4]$  (b),  $\text{PPh}_4[\text{GdL}_4]$  (c).

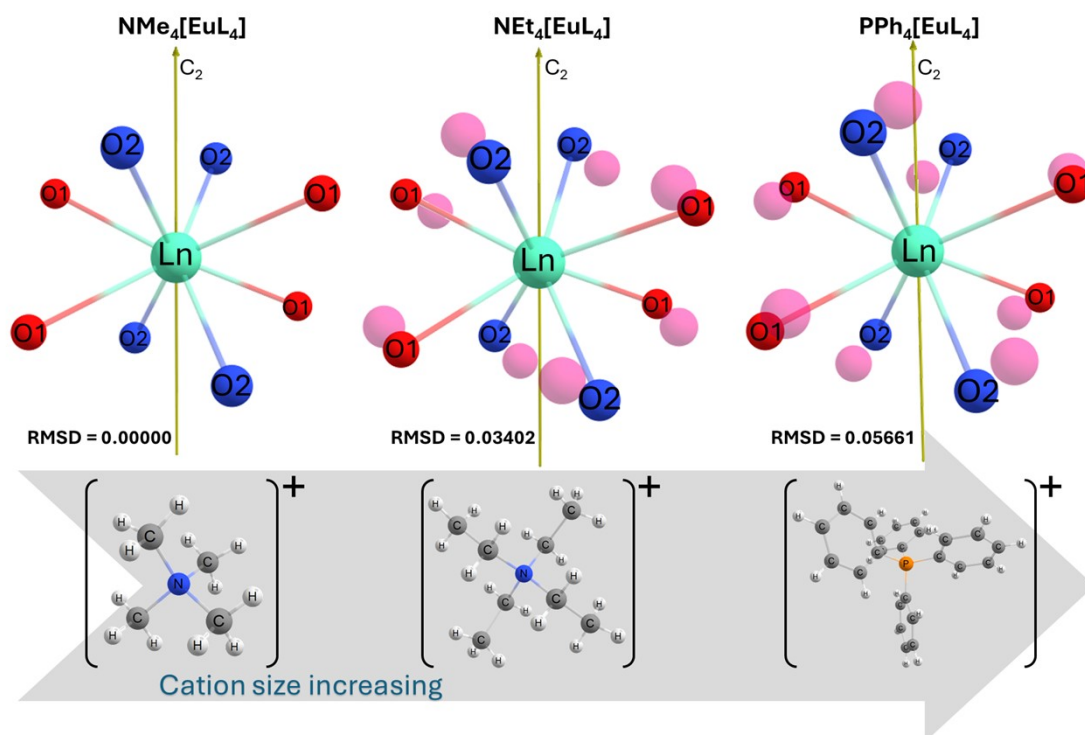

**Figure S4.** The effect of increasing cation size on the distortion of the coordination polyhedron of the studied compounds. The  $\text{NMe}_4[\text{EuL}_4]$  has an exact C<sub>2</sub> axis (RMSD = 0.00000), while the others deviate from the exact C<sub>2</sub> positions, represented by pink spheres. When the cation is changed to a larger one, the coordination polyhedron starts to distort, increasing the RMSD values, as illustrated. O1 stands for the oxygen atoms of the C=O groups, while O2 stands for the oxygen atoms of the P=O groups.

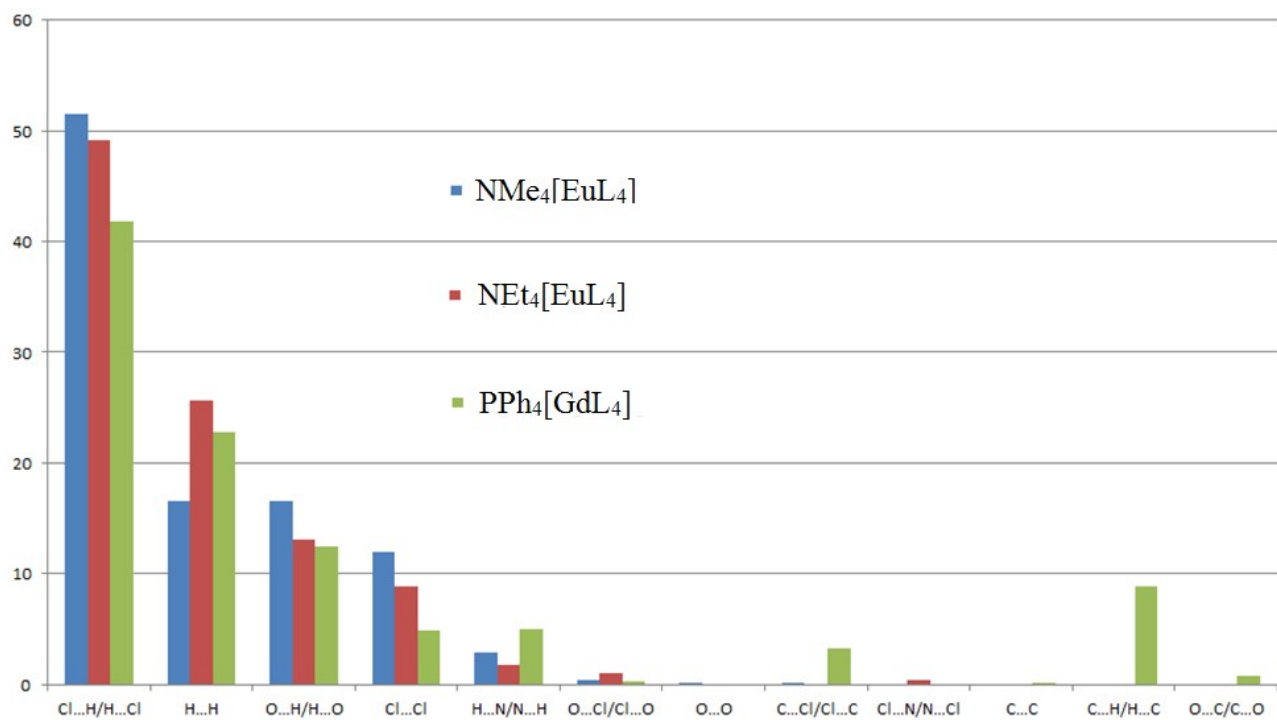

**Figure S5.** The relative contributions of various interactions into the total Hirshfeld surfaces for the obtained complexes (in %).



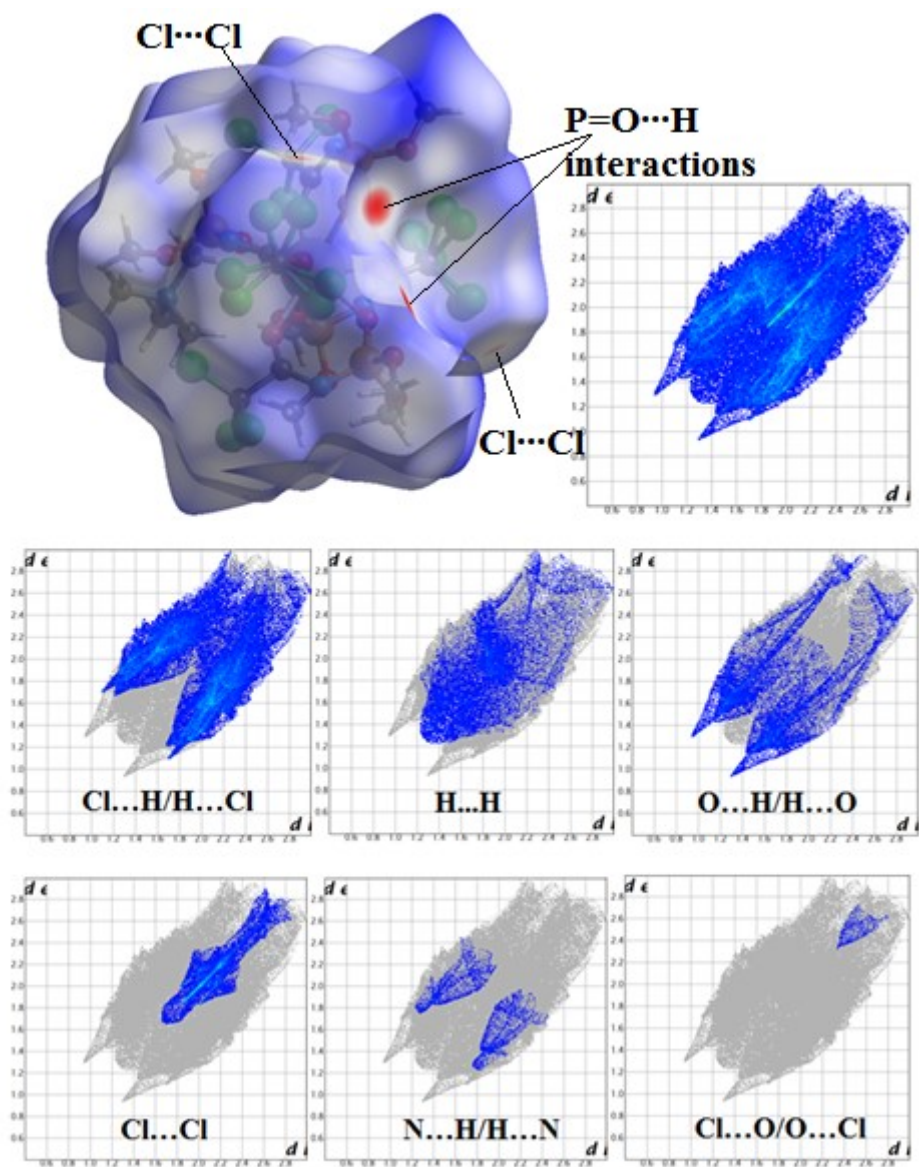

**Figure S6.** The Hirshfeld surface mapped over  $d_{\text{norm}}$  and two-dimensional fingerprint plots for the interactions with major contribution of  $\text{Cl}\cdots\text{H}/\text{H}\cdots\text{Cl}$  (51.5%),  $\text{H}\cdots\text{H}$  (16.5%),  $\text{O}\cdots\text{H}/\text{H}\cdots\text{O}$  (16.5%),  $\text{Cl}\cdots\text{Cl}$  (12.0%),  $\text{H}\cdots\text{N}/\text{N}\cdots\text{H}$  (2.9%), and  $\text{Cl}\cdots\text{O}/\text{O}\cdots\text{Cl}$  (0.4%) in  $\text{NMe}_4[\text{EuL}_4]$ .

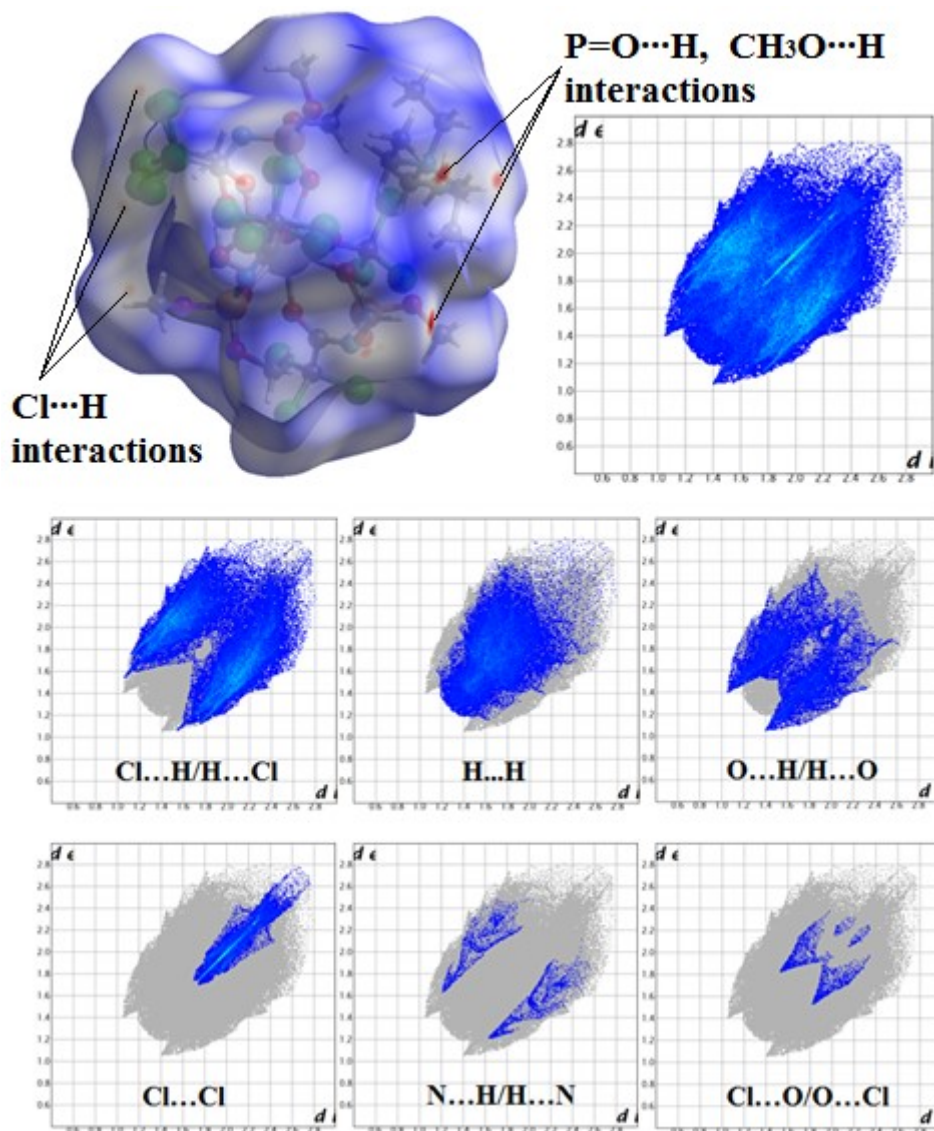

**Figure S7.** The Hirshfeld surface mapped over  $d_{\text{norm}}$  and two-dimensional fingerprint plots for the interactions with major contribution of Cl...H/H...Cl (49.1%), H...H (25.7%), O...H/H...O (13.1%), Cl...Cl (8.8%), H...N/N...H (1.7%), and Cl...O/O...Cl (1.0%) in NEt<sub>4</sub>[EuL<sub>4</sub>].



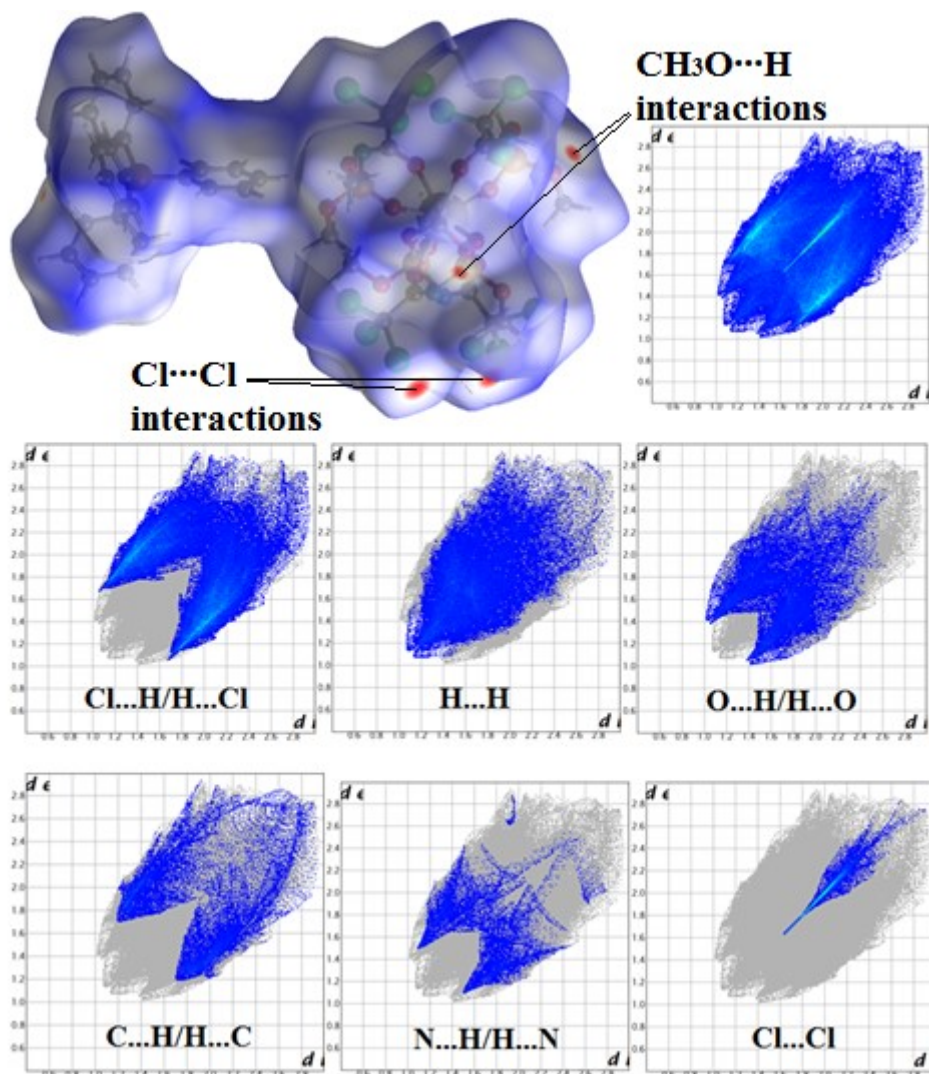

**Figure S8.** The Hirshfeld surface mapped over  $d_{\text{norm}}$  and two-dimensional fingerprint plots for the interactions with major contribution of Cl...H/H...Cl (41.8%), H...H (22.8%), O...H/H...O (12.5%), C...H/H...C (8.8%), H...N/N...H (5.0%), and Cl...Cl (4.9%) in PPh<sub>4</sub>[GdL<sub>4</sub>].

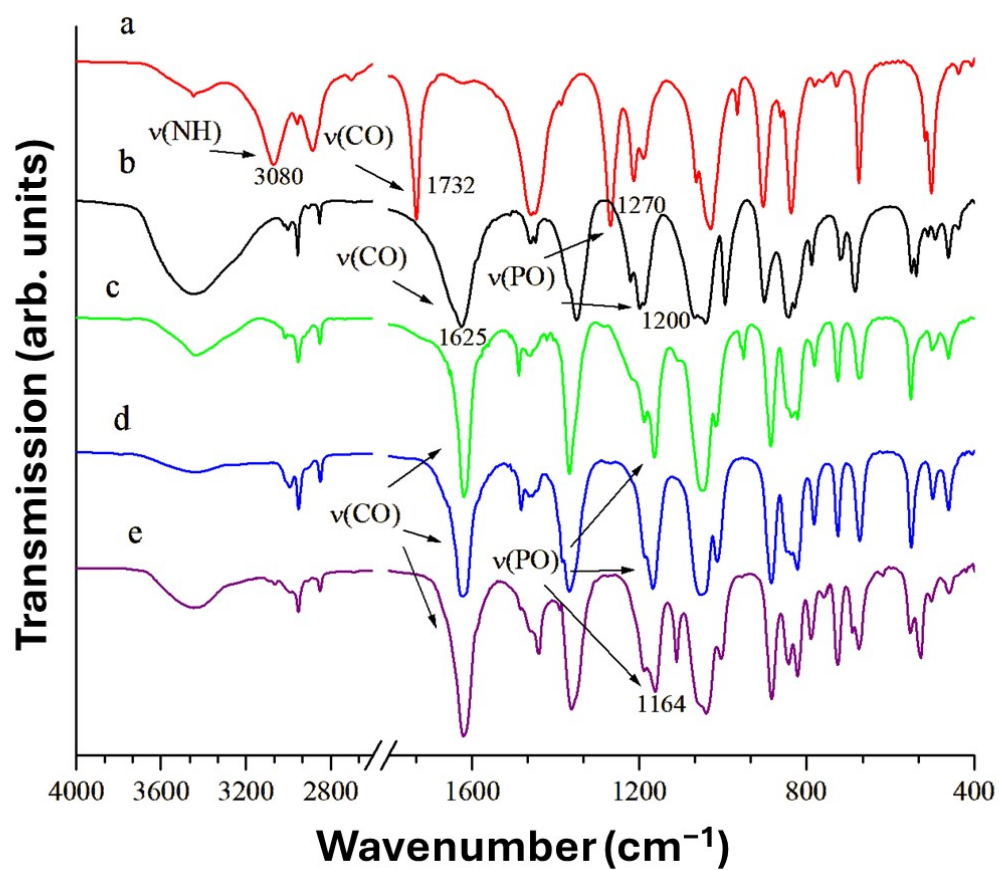

**Figure S9.** IR spectra for a) HL, b) NaL, c) NMe<sub>4</sub>[GdL<sub>4</sub>], d) NEt<sub>4</sub>[GdL<sub>4</sub>], and e) PPh<sub>4</sub>[GdL<sub>4</sub>].

## References

- [1] B.R. Judd, Optical absorption intensities of rare-earth ions, *Phys. Rev.* 127 (1962) 750–761. <https://doi.org/10.1103/PhysRev.127.750>.
- [2] C.K. Jørgensen, B.R. Judd, Hypersensitive pseudoquadrupole transitions in lanthanides, *Mol. Phys.* 8 (1964) 281–290. <https://doi.org/10.1080/00268976400100321>.
- [3] G.S. Ofelt, Intensities of Crystal Spectra of Rare-Earth Ions, *J. Chem. Phys.* 37 (1962) 511–520. <https://doi.org/10.1063/1.1701366>.
- [4] S.F. Mason, R.D. Peacock, B. Stewart, Ligand-polarization contributions to the intensity of hypersensitive trivalent lanthanide transitions, *Mol. Phys.* 30 (1975) 1829–1841. <https://doi.org/10.1080/00268977500103321>.
- [5] B.G. Wybourne, *Spectroscopic Properties of Rare Earths*, John Wiley & Sons, New York, 1965.
- [6] G.F. de Sá, O.L. Malta, C. de Mello Donegá, A.M. Simas, R.L. Longo, P.A. Santa-Cruz, E.F. da Silva, Spectroscopic properties and design of highly luminescent lanthanide coordination complexes, *Coord. Chem. Rev.* 196 (2000) 165–195. [https://doi.org/10.1016/S0010-8545\(99\)00054-5](https://doi.org/10.1016/S0010-8545(99)00054-5).
- [7] R.T. Moura Jr., A.N. Carneiro Neto, R.L. Longo, O.L. Malta, On the calculation and interpretation of covalency in the intensity parameters of 4f-4f transitions in  $\text{Eu}^{3+}$  complexes based on the chemical bond overlap polarizability, *J. Lumin.* 170 (2016) 420–430. <https://doi.org/10.1016/j.jlumin.2015.08.016>.
- [8] R.T. Moura Jr., A.N. Carneiro Neto, E.C. Aguiar, C. V. Santos-Jr., E.M. de Lima, W.M. Faustino, E.E.S. Teotonio, H.F. Brito, M.C.F.C. Felinto, R.A.S. Ferreira, L.D. Carlos, R.L. Longo, O.L. Malta, (INVITED) JOYSpectra: A web platform for luminescence of lanthanides, *Opt. Mater.* X. 11 (2021) 100080. <https://doi.org/10.1016/j.omx.2021.100080>.
- [9] O.L. Malta, H.J. Batista, L.D. Carlos, Overlap polarizability of a chemical bond: a scale of covalency and application to lanthanide compounds, *Chem. Phys.* 282 (2002) 21–30. [https://doi.org/10.1016/S0301-0104\(02\)00631-6](https://doi.org/10.1016/S0301-0104(02)00631-6).
- [10] R.T. Moura, O.L. Malta, R.L. Longo, The chemical bond overlap plasmon as a tool for quantifying covalency in solid state materials and its applications to spectroscopy, *Int. J. Quantum Chem.* 111 (2011) 1626–1638. <https://doi.org/10.1002/qua.22782>.
- [11] R.T. Moura Jr., G.C.S. Duarte, T.E. da Silva, O.L. Malta, R.L. Longo, Features of chemical bonds based on the overlap polarizabilities: diatomic and solid-state systems with the frozen-density embedding approach, *Phys. Chem. Chem. Phys.* 17 (2015) 7731–7742. <https://doi.org/10.1039/C4CP05283H>.
- [12] I.F. Costa, L. Blois, A.N. Carneiro Neto, E.E.S. Teotonio, H.F. Brito, L.D. Carlos, M.C.F.C. Felinto, R.T. Moura Jr., R.L. Longo, W.M. Faustino, O.L. Malta, Chapter 2 Reinterpreting the Judd–Ofelt parameters based on recent theoretical advances, in: M.G. Brik, A.M. Srivastava (Eds.), *Lumin. Mater.*, 1st ed., De Gruyter, 2023: pp. 19–62. <https://doi.org/10.1515/9783110607871-002>.

- [13] A.N. Carneiro Neto, R.T. Moura Jr., Overlap integrals and excitation energies calculations in trivalent lanthanides 4f orbitals in pairs Ln-L (L = Ln, N, O, F, P, S, Cl, Se, Br, and I), *Chem. Phys. Lett.* 757 (2020) 137884. <https://doi.org/10.1016/j.cplett.2020.137884>.
